# Supplementary material
Source: MDPI journal article supplement (https://www.mdpi.com/2075-163X/7/10/202)
Supplement: s1 [file s1]

Archive with 10 entries (10 files):
- Figure S1.pdf
- Figure S2.pdf
- Supplementary Material 1.pdf
- Supplementary Material 2.pdf
- Table S1.pdf
- Table S2.pdf
- Table S3.pdf
- Table S4.pdf
- Table S5.pdf
- Table S6.pdf
