# Supplementary material
Source: MDPI journal article supplement (https://www.mdpi.com/2075-163X/7/10/202)

Figure S1: Detailed description of the sample set. Backscatter electron scans of sample blocks illustrating macroscopic textures and dominant mineralogy.

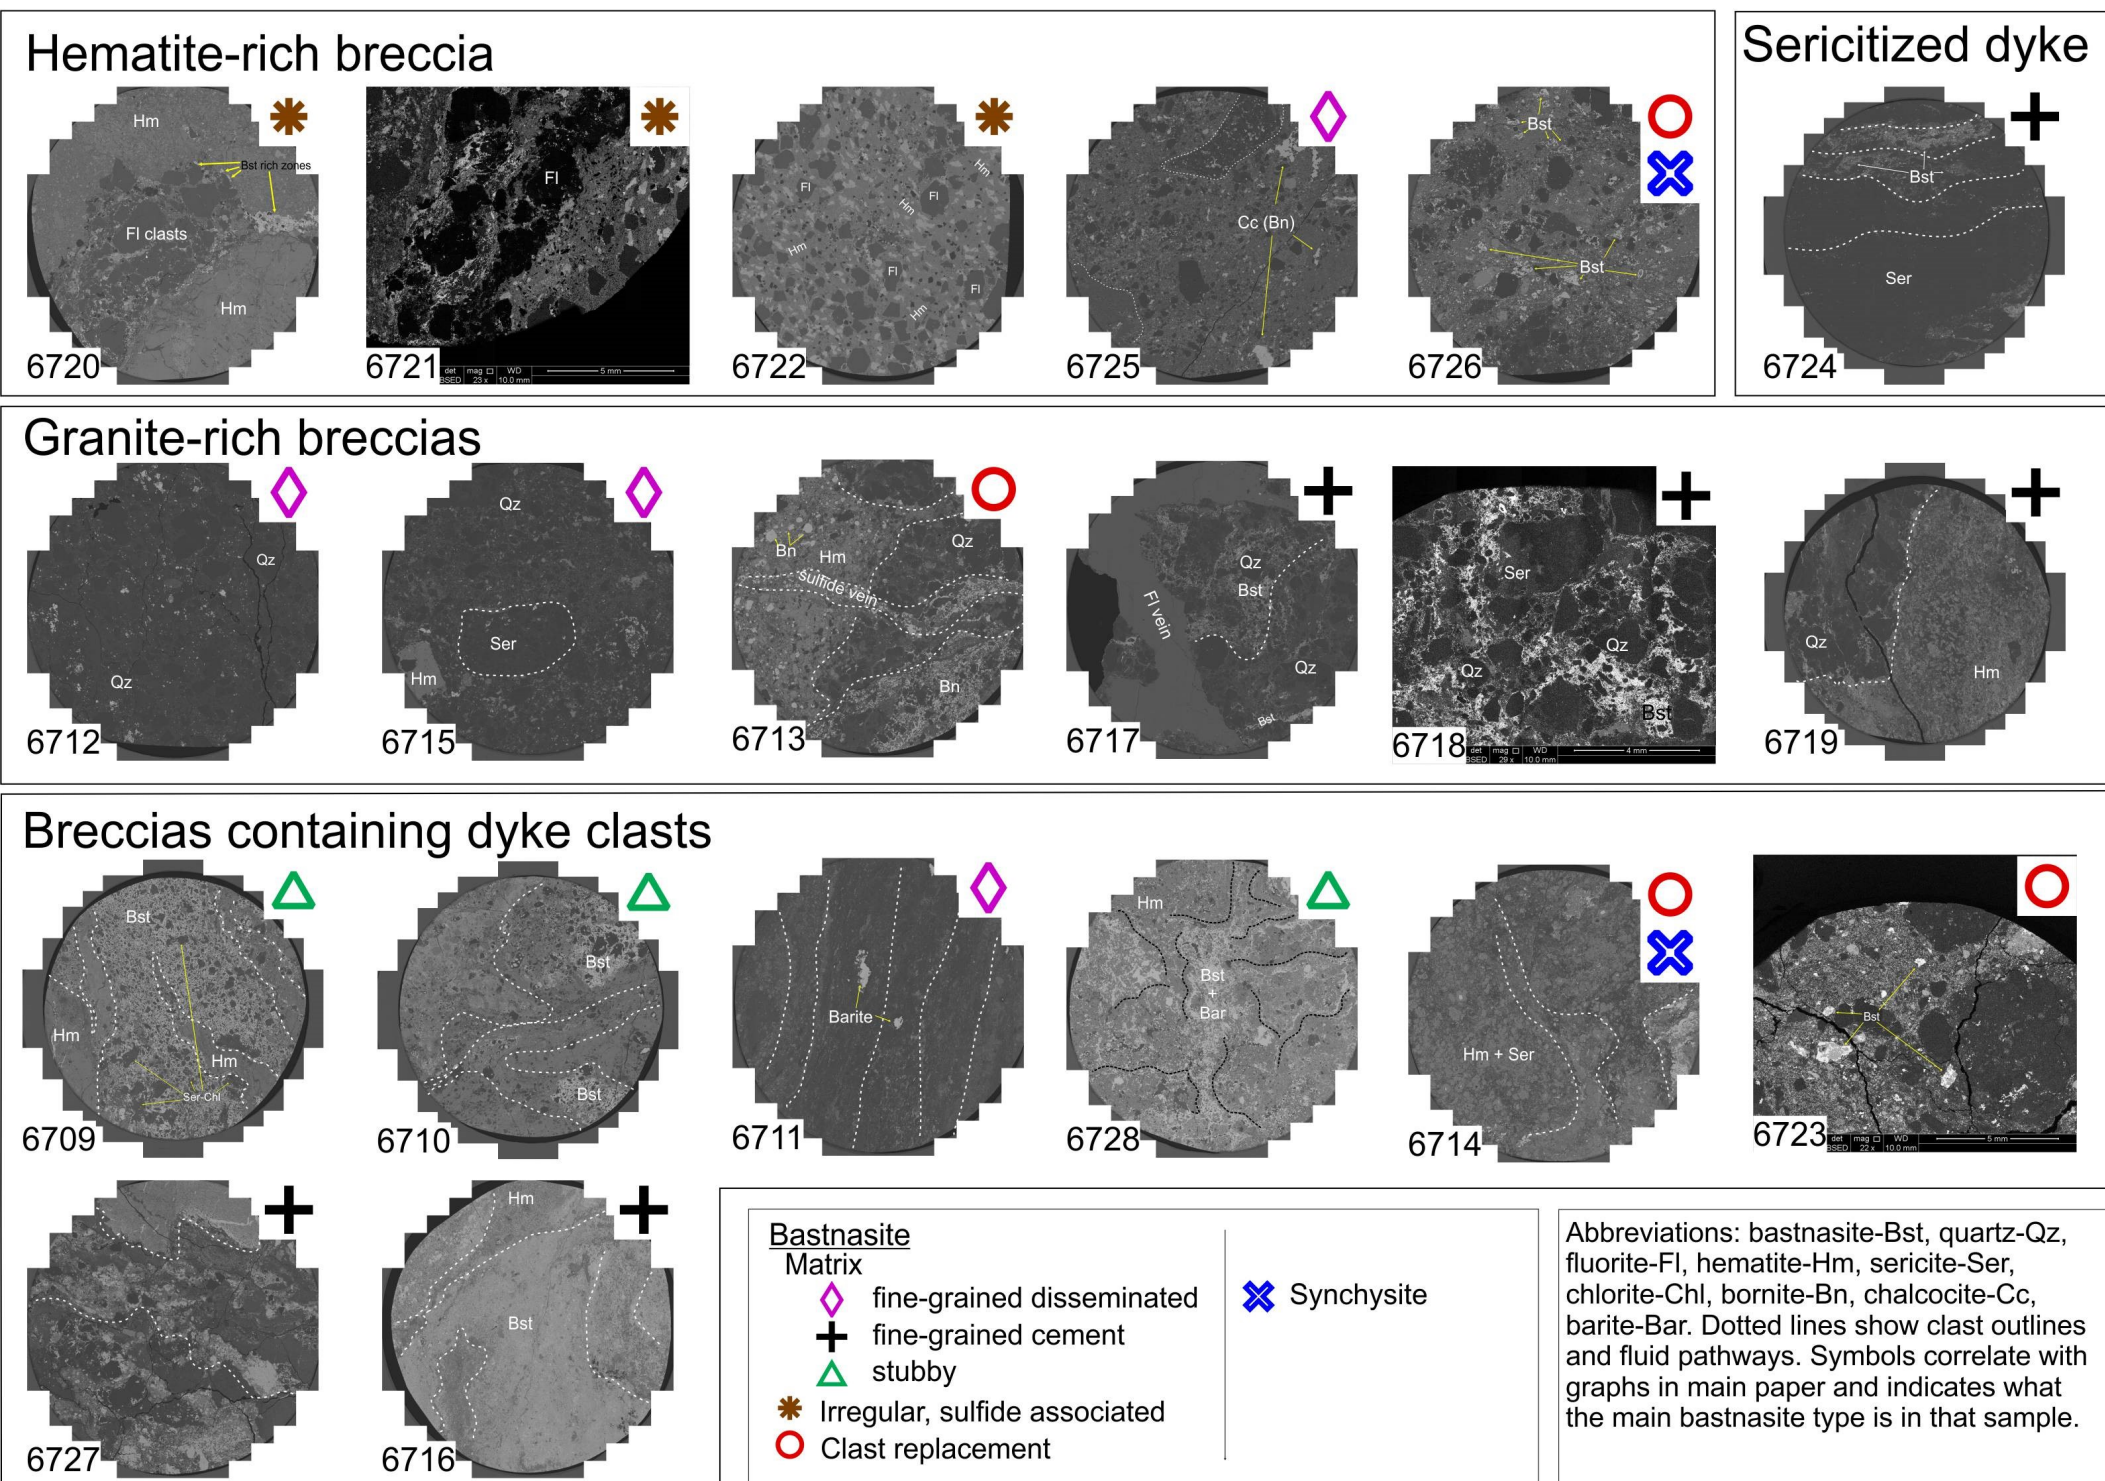

Supplement: s1 [file s1 › Figure S1.pdf]
