# Supplementary material
Source: MDPI journal article supplement (https://www.mdpi.com/2075-163X/7/10/202)
Supplement: s1 [file s1 › Figure S2.pdf]

**Figure S2:** Downhole profiles from LA-ICP-MS analysis demonstrating variation in U and Th and other elements in bastnäsite. Figures A and B show counts-per-second (CPS) vs. time (seconds). Arrows to highlight signals caused by inclusions.

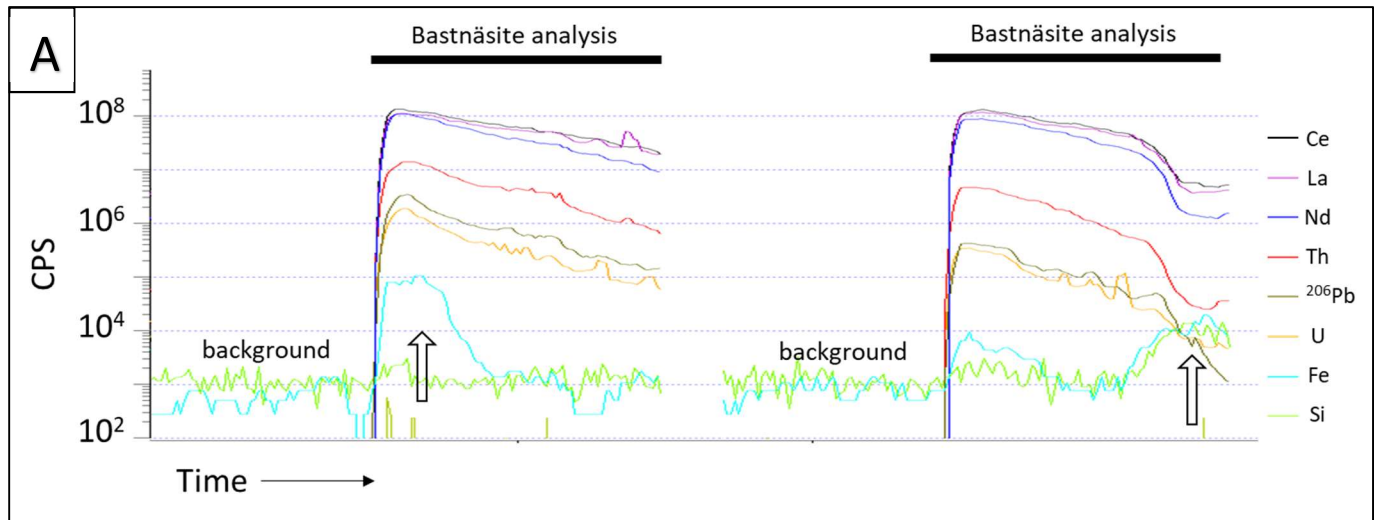

**Figure A:** Bastnäsite analysis with elevated Th, U, and  $^{206}\text{Pb}$  with REE in bastnäsite, and with Fe and Si contained within inclusions. RX6726.

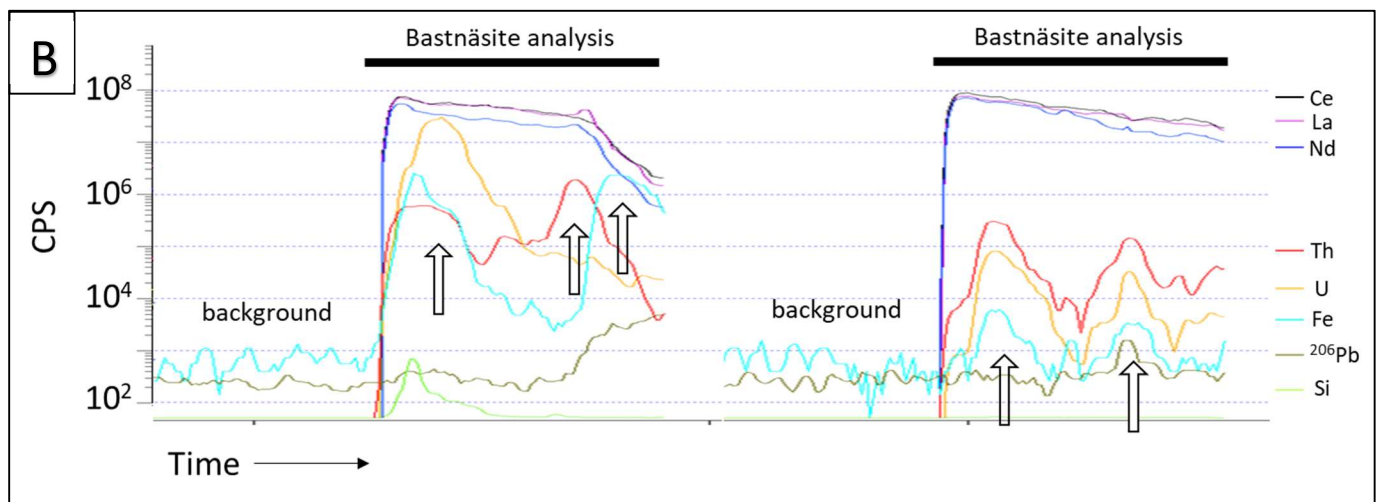

**Figure B:** Bastnasite analysis with inclusions containing U, Th, and Fe. RX6709.
