# Supplementary material
Source: MDPI journal article supplement (https://www.mdpi.com/2075-163X/7/10/202)
Supplement: s1 [file s1 › Supplementary Material 2.pdf]

## Supplementary Material 2: Analytical Methods, Laser Ablation Inductively Coupled Mass Spectrometry

Trace element and isotopic analysis was performed by Laser Ablation Inductively Coupled Mass Spectrometry (LA-ICP-MS) using a RESOLUTION-LR ArF excimer laser ablation system (Australian Scientific Instruments) equipped with a large format S155 sample chamber (Laurin Technic Inc.) and coupled to an Agilent 7900x ICP-MS. Reference standards used were GSD-1G and NIST-610 glasses. Operating conditions were set at 5 Hz and a fluence of 3.5 J/cm<sup>2</sup>. This dataset supplements the EPMA data by: providing quantitative data for (H)REE elements at low concentrations approaching the mdl by EPMA; and concentration data for other potential trace elements well below EPMA mdl values.

Spot size was generally 9 µm, although occasionally up to 29 µm where the mineral grain in question was large enough. Following 5 pulses of pre-ablation cleaning, 30 s of gas background was collected, followed by a sample ablation of 40 s, giving 70 s of instrument analysis. Isotopes measured were <sup>23</sup>Na, <sup>27</sup>Al, <sup>29</sup>Si, <sup>31</sup>P, <sup>43</sup>Ca, <sup>45</sup>Sc, <sup>55</sup>Mn, <sup>57</sup>Fe, <sup>65</sup>Cu, <sup>75</sup>As, <sup>88</sup>Sr, <sup>89</sup>Y, <sup>90</sup>Zr, <sup>93</sup>Nb, <sup>137</sup>Ba, <sup>139</sup>La, <sup>140</sup>Ce, <sup>141</sup>Pr, <sup>146</sup>Nd, <sup>147</sup>Sm, <sup>153</sup>Eu, <sup>157</sup>Gd, <sup>159</sup>Tb, <sup>163</sup>Dy, <sup>165</sup>Ho, <sup>166</sup>Er, <sup>169</sup>Tm, <sup>172</sup>Yb, <sup>175</sup>Lu, <sup>178</sup>Hf, <sup>181</sup>Ta, <sup>182</sup>W, <sup>202</sup>Hg, <sup>204</sup>Pb, <sup>206</sup>Pb, <sup>207</sup>Pb, <sup>208</sup>Pb, <sup>209</sup>Bi, <sup>232</sup>Th, and <sup>238</sup>U. Dwell times for <sup>23</sup>Na, <sup>27</sup>Al, <sup>29</sup>Si, and <sup>31</sup>P were 0.005 s, <sup>206</sup>Pb and <sup>207</sup>Pb were 0.02 s, <sup>232</sup>Th, and <sup>238</sup>U were 0.03 s, and all others were 0.01 s giving a total sweep time of 0.513 seconds. <sup>202</sup>Hg was collected in order to correct for the interference of <sup>204</sup>Hg on <sup>204</sup>Pb. Calibration used Ce as the internal standard element based on the wt.% Ce measured from each location by EPMA. Supplementary Table S4 details the set up and mdl values.

Data reduction was performed using the software Iolite v3.4 [1] and processed using the “Trace\_Elements\_IS” data reduction scheme. LA-ICP-MS data presented in Table 3 of the manuscript shows mean and range data values for textural and mineral groupings. Filtered mean and range LA-ICP-MS values (excluding more than 20% deviation from the mean) was used for the chondrite-normalized REE fractionation patterns given as Figure 9b of the manuscript to aid in the visibility of the individual ranges. The full LA-ICP-MS dataset can be found in supplementary Table S6.

## Supplementary Material 2 References

1. Paton, C.; Hellstrom, J.; Paul, B.; Woodhead, J.; Hergt, J. Iolite: Freeware for the visualisation and processing of mass spectrometric data. *J. Anal. Atom. Spectrom.* **2011**, 26, 2508.
