# Supplementary material
Source: MDPI journal article supplement (https://www.mdpi.com/2075-163X/7/10/202)
Supplement: s1 [file s1 › Table S1.pdf]

Table S1: XRD values from expanded sample material of sample block location for detailed analysis.

| Lithology                       | Sample location |            |            |                | Mineral abundance wt% (XRD)* |      |     |      |      |     |      |      |     |      |     |
|---------------------------------|-----------------|------------|------------|----------------|------------------------------|------|-----|------|------|-----|------|------|-----|------|-----|
|                                 | Area            | Drill hole | Sample no. | Core depth (m) | Hm                           | Qz   | Chl | Fl   | Bar  | Flo | Bst  | Ser  | Cp  | Bn   | Cc  |
| Breccias containing dyke clasts | NW arm          | RU34-3829  | RX6709     | 72.8-73.0      | 31.7                         | -    | 9.9 | -    | 2.3  | 2.9 | 44.2 | 7.5  | -   | 1.5  | -   |
|                                 |                 |            | RX6710     | 73.6-73.7      | 37.8                         | -    | 6.1 | -    | 1.0  | 4.0 | 36.4 | 14.7 | -   | -    | -   |
|                                 |                 |            | RX6711     | 74.7-74.8      | 20.2                         | -    | 8.6 | -    | 1.4  | 3.9 | 0.8  | 65.1 | -   | -    | -   |
|                                 | East edge       | RU41-2571  | RX6728     | 174.8-174.9    | 72.2                         | -    | 6.0 | -    | 7.0  | 1.1 | 9.3  | 4.3  | -   | -    | -   |
|                                 |                 |            | RX6714     | 66.3-66.4      | 46.6                         | -    | -   | -    | 0.4  | 4.0 | 10.6 | 38.4 | -   | -    | -   |
|                                 |                 |            | RX6723     | 4.3-4.4        | 19.8                         | 39.1 | -   | 1.4  | -    | 0.6 | 1.4  | 34.5 | -   | 0.5  | 2.7 |
|                                 | Central         | RU34-454   | RX6716     | 82.9-83.0      | 46.4                         | 1.8  | -   | -    | -    | 1.3 | 36.9 | 13.7 | -   | -    | -   |
|                                 |                 |            | RX6727     | 51.8-51.9      | 16.3                         | 14.0 | -   | 1.1  | 4.3  | 1.6 | 13.9 | 38.9 | -   | 1.5  | 8.4 |
| Granite-rich breccias           | East edge       | RU3-558    | RX6712     | 23.7-23.8      | 10.6                         | 38.7 | -   | -    | 1.2  | 0.8 | 3.7  | 45.0 | -   | -    | -   |
|                                 |                 |            | RX6715     | 12.2-12.3      | 32.8                         | 30.0 | 1.0 | -    | 19.4 | 0.3 | 4.9  | 11.8 | -   | -    | -   |
|                                 | Central         | RU3-954    | RX6713     | 70.1-70.2      | 15.3                         | 32.1 | 0.2 | 7.6  | 1.1  | 1.0 | 0.9  | 34.3 | -   | 7.6  | -   |
|                                 | NW arm          | RU31-751   | RX6717     | 90.3-90.4      | 7.3                          | 36.3 | 3.6 | 1.5  | -    | -   | 6.0  | 45.2 | -   | -    | -   |
|                                 |                 |            | RX6718     | 90.8-91.0      | 7.5                          | 42.5 | 1.2 | 1.8  | -    | -   | 4.6  | 42.2 | -   | -    | -   |
|                                 |                 | RU31-767   | RX6719     | 5.3-5.4        | 21.1                         | 46.9 | -   | 0.9  | -    | -   | 7.9  | 18.1 | -   | 2.5  | 2.7 |
| Hematite-rich breccia           | Central         | RU40-1407  | RX6720     | 19.0-19.2      | 60.1                         | 2.6  | -   | 21.1 | -    | 0.2 | 1.3  | 9.1  | 4.9 | 0.7  | -   |
|                                 |                 |            | RX6721     | 19.4-19.5      | 32.4                         | 3.3  | -   | 33.1 | -    | -   | 14.8 | 7.1  | 2.9 | 6.4  | -   |
|                                 |                 |            | RX6722     | 19.7-19.8      | 61.9                         | 2.2  | -   | 19.1 | -    | -   | 0.8  | -    | 0.3 | 15.8 | -   |
|                                 | East edge       | RU38-2994  | RX6725     | 92.8-92.9      | NO DATA                      |      |     |      |      |     |      |      |     |      |     |
|                                 |                 |            | RX6726     | 77.1-77.3      | 22.3                         | 20.5 | 0.9 | -    | -    | 0.9 | 8.8  | 41.3 | -   | 1.3  | 4.1 |
| Sericitized dyke                | NW arm          | RU41-5181  | RE6724     | 183.7-183.8    | 4.5                          | -    | -   | -    | -    | -   | 17.1 | 78.4 | -   | -    | -   |

mineral abbreviations: Hm - hematite; Qz - quartz; Chl - chlorite; Fl - fluorite; Bar - barite; Flo - florencite; Bst - bastnasite; Ser - sericite; Cp - chalcopyrite; Bn - bornite; Cc - chalcocite.
