# Supplementary material
Source: MDPI journal article supplement (https://www.mdpi.com/2075-163X/7/10/202)
Supplement: s1 [file s1 › Table S2.pdf]

Table S2: Full details of analytical set-up for EPMA analysis; elements analyzed, peak/background positions, count times, standards, elemental overlap corrections used in REE mineral package.

| Element and Line | Diffracting Crystal (Sp#) | Background type/fit | kV/nA  | Peak Count Time | Bkgd Count Times |    | # bkgd points acquired | Standards <sup>1</sup> |                       |                       |                        | Overlapping element and order with their overlap correction standard |         |                  |         |                  |         |                  |         |                  |         |                  |         |  |
|------------------|---------------------------|---------------------|--------|-----------------|------------------|----|------------------------|------------------------|-----------------------|-----------------------|------------------------|----------------------------------------------------------------------|---------|------------------|---------|------------------|---------|------------------|---------|------------------|---------|------------------|---------|--|
|                  |                           |                     |        |                 | Lo               | Hi |                        | Primary standards      | Secondary standards 1 | Secondary standards 2 | Interference standards | Interfering line                                                     | Int std | Interfering line | Int std | Interfering line | Int std | Interfering line | Int std | Interfering line | Int std | Interfering line | Int std |  |
|                  |                           |                     |        |                 |                  |    |                        |                        |                       |                       |                        |                                                                      |         |                  |         |                  |         |                  |         |                  |         |                  |         |  |
| Cu Ka            | LLUF (3)                  | Shared              | 15/20  | 20              | 10               | 10 | 1/3                    | 556                    |                       |                       |                        | Tm I                                                                 | 815     | Tb I             | 814     | Er I             | 805     |                  |         |                  |         |                  |         |  |
| Ho Lb            | LLUF (3)                  | Shared              | 15/100 | 40              | 10               | 10 | 4/8                    | 1109                   | 808                   |                       |                        | Y II                                                                 | 816     | Yb I             | 817     | Sm I             | 635     | Eu I             | 806     | Th II            | 629     |                  |         |  |
| Yb La            | LLUF (3)                  | Shared              | 15/100 | 40              | 10               | 10 | 4/12                   | 1112                   | 817                   |                       |                        | Y II                                                                 | 816     | Ho I             | 808     | Dy I             | 804     | Tb I             | 814     |                  |         |                  |         |  |
| Tm La            | LLUF (3)                  | Shared              | 15/100 | 40              | 10               | 10 | 7/12                   | 1111                   | 815                   |                       |                        | Dy I                                                                 | 804     | Sm I             | 635     |                  |         |                  |         |                  |         |                  |         |  |
| Er La            | LLUF (3)                  | Shared              | 15/100 | 40              | 10               | 10 | 5/8                    | 1110                   | 805                   |                       |                        | Tb I                                                                 | 814     |                  |         |                  |         |                  |         |                  |         |                  |         |  |
| Gd Lb            | LLUF (3)                  | Shared              | 15/100 | 40              | 10               | 10 | 7/8                    | 634                    | 1106                  |                       |                        | U II                                                                 | 631     | Ho I             | 808     |                  |         |                  |         |                  |         |                  |         |  |
| Dy La            | LLUF (3)                  | Shared              | 15/100 | 40              | 10               | 10 | 8/6                    | 1108                   | 804                   |                       |                        | Th II                                                                | 629     | Eu I             | 806     | Pb II            | 627     | Yb I             | 817     |                  |         |                  |         |  |
| Fe Ka            | LLUF (3)                  | Shared              | 15/20  | 20              | 10               | 10 | 8/6                    | 502                    |                       |                       |                        | Th II                                                                | 629     |                  |         |                  |         |                  |         |                  |         |                  |         |  |
| Tb La            | LLUF (3)                  | Shared              | 15/100 | 40              | 10               | 10 | 8/6                    | 1107                   | 814                   |                       |                        | Pb II                                                                | 627     | Pr I             | 637     | Sm I             | 635     |                  |         |                  |         |                  |         |  |
| Sm Lb            | LLUF (3)                  | Shared              | 15/100 | 40              | 10               | 10 | 12/9                   | 635                    | 1104                  |                       |                        | Tb I                                                                 | 814     | Nd I             | 636     |                  |         |                  |         |                  |         |                  |         |  |
| Mn Ka            | LLUF (3)                  | Shared              | 15/20  | 20              | 10               | 10 | 12/6                   | 557                    |                       |                       |                        | As II                                                                | 562     |                  |         |                  |         |                  |         |                  |         |                  |         |  |
| Eu La            | LLUF (3)                  | Shared              | 15/100 | 40              | 10               | 10 | 3/6                    | 1105                   | 806                   |                       |                        | Pr I                                                                 | 637     | Nd I             | 636     |                  |         |                  |         |                  |         |                  |         |  |
| Nd Lb            | LLUF (3)                  | Shared              | 15/100 | 40              | 10               | 10 | 4/3                    | 636                    | 1103                  |                       |                        | U II                                                                 | 631     |                  |         |                  |         |                  |         |                  |         |                  |         |  |
| Pr Lb            | LLUF (3)                  | Shared              | 15/100 | 40              | 10               | 10 | 4/1                    | 637                    | 1102                  |                       |                        | U III                                                                | 631     |                  |         |                  |         |                  |         |                  |         |                  |         |  |
| Ce La            | PET (1)                   | Linear              | 15/100 | 20              | 40               | 40 | 1/1                    | 633                    | 1101                  |                       |                        | Y III                                                                | 816     | Yb II            | 817     | Tm II            | 815     |                  |         |                  |         |                  |         |  |
| La La            | PET (1)                   | Linear              | 15/100 | 20              | 40               | 40 | 1/1                    | 632                    | 1100                  |                       |                        | Nd I                                                                 | 636     | Tm II            | 815     |                  |         |                  |         |                  |         |                  |         |  |
| Ti Ka            | PET (1)                   | Multipoint          | 15/20  | 30              | 20               | 20 | 2/2                    | 559                    |                       |                       |                        | U III                                                                | 631     |                  |         |                  |         |                  |         |                  |         |                  |         |  |
| Ba La            | PET (1)                   | Multipoint          | 15/100 | 20              | 20               | 20 | 1/2                    | 554                    |                       |                       | 816                    | Ti I                                                                 | 559     | U III            | 631     | Pr I             | 637     |                  |         |                  |         |                  |         |  |
| Te La            | PET (1)                   | Multipoint          | 15/100 | 20              | 20               | 20 | 2/2                    | 560                    |                       |                       |                        | Sm II                                                                | 635     | U I              | 631     |                  |         |                  |         |                  |         |                  |         |  |
| Ca Ka            | PET (1)                   | Multipoint          | 15/20  | 20              | 20               | 20 | 2/2                    | 535                    |                       |                       |                        | Y IV                                                                 | 816     | Yb II            | 817     | Th III           | 629     | Dy II            | 804     | Tb II            | 814     |                  |         |  |
| U Mb             | LPET (1)                  | Multipoint          | 15/100 | 60              | 20               | 20 | 2/2                    | 631                    |                       |                       |                        | K I                                                                  | 541     | Th I             | 629     | Ho II            | 808     | Gd II            | 634     |                  |         |                  |         |  |
| K Ka             | LPET (1)                  | Multipoint          | 15/20  | 20              | 20               | 20 | 2/2                    | 541                    |                       |                       |                        | U I                                                                  | 631     |                  |         |                  |         |                  |         |                  |         |                  |         |  |
| Th Ma            | LPET (5)                  | Linear              | 15/100 | 60              | 40               | 40 | 1/1                    | 629                    |                       |                       |                        | Gd II                                                                | 634     | Y V              | 816     |                  |         |                  |         |                  |         |                  |         |  |
| Cl Ka            | LPET (5)                  | Linear              | 15/20  | 15              | 40               | 40 | 1/2                    | 545                    |                       |                       |                        | Ce II                                                                | 633     | Nd II            | 636     | Er III           | 805     | Ho III           | 808     |                  |         |                  |         |  |
| Pb Mb            | LPET (5)                  | Multipoint          | 15/100 | 100             | 30               | 30 | 3/2                    | 627                    | 520                   |                       |                        | U I                                                                  | 631     | S I              | 530     | Ce II            | 633     | Y VI             | 638     |                  |         |                  |         |  |
| S Ka             | LPET (5)                  | Multipoint          | 15/20  | 20              | 20               | 20 | 1/2                    | 530                    |                       |                       |                        | Nd II                                                                | 636     | La II            | 632     |                  |         |                  |         |                  |         |                  |         |  |
| Nb La            | LPET (5)                  | Multipoint          | 15/100 | 20              | 10               | 20 | 1/2                    | 616                    |                       |                       |                        | Mn III                                                               | 557     |                  |         |                  |         |                  |         |                  |         |                  |         |  |
| Zr La            | LPET (5)                  | Multipoint          | 15/100 | 30              | 20               | 20 | 2/1                    | 599                    |                       |                       |                        | Nd III                                                               | 636     | P I              | 740     | Tb IV            | 814     |                  |         |                  |         |                  |         |  |
| P Ka             | LPET (5)                  | Multipoint          | 15/20  | 15              | 20               | 20 | 2/2                    | 504                    |                       |                       |                        | Ca II                                                                | 558     | Cu IV            | 556     | Tm IV            | 815     | Gd III           | 1106    | Ce III           | 1101    |                  |         |  |
| Y La             | LPET (5)                  | Multipoint          | 15/100 | 40              | 20               | 20 | 2/2                    | 628                    | 1115                  | 638                   |                        | La III                                                               | 632     | Ho IV            | 808     |                  |         |                  |         |                  |         |                  |         |  |
| F Ka             | PCO (2)                   | Multipoint          | 15/20  | 20              | 40               | 40 | 4/4                    | 2001                   | 2002                  |                       |                        | Sm VIII                                                              | 635     | Ce VII           | 633     | P III            | 740     | Y III            | 638     | La VIII          | 632     | U V              | 631     |  |
| Sr La            | TAP (4)                   | Multipoint          | 15/100 | 30              | 20               | 20 | 1/3                    | 513                    |                       |                       |                        | Y I                                                                  | 816     | U II             | 631     |                  |         |                  |         |                  |         |                  |         |  |
| Si Ka            | TAP (4)                   | Multipoint          | 15/20  | 40              | 20               | 20 | 1/2                    | 501                    |                       |                       |                        | Y I                                                                  | 638     | Tb IV            | 814     | Nd III           | 636     | Er IV            | 805     |                  |         |                  |         |  |
| Al Ka            | TAP (4)                   | Multipoint          | 15/20  | 20              | 20               | 20 | 2/2                    | 501                    |                       |                       | 740                    | Ti III                                                               | 559     | Yb I             | 817     | Ho I             | 808     |                  |         |                  |         |                  |         |  |
| As La            | TAP (4)                   | Multipoint          | 15/100 | 40              | 20               | 20 | 1/2                    | 562                    |                       |                       | 558                    | Sm I                                                                 | 635     | Nd IV            | 636     |                  |         |                  |         |                  |         |                  |         |  |
| Mg Ka            | TAP (4)                   | Multipoint          | 15/20  | 30              | 20               | 20 | 1/2                    | 502                    |                       |                       |                        | U II                                                                 | 631     |                  |         |                  |         |                  |         |                  |         |                  |         |  |
| Na Ka            | TAP (4)                   | Multipoint          | 15/20  | 20              | 20               | 20 | 2/2                    | 501                    |                       |                       |                        | U III                                                                | 631     |                  |         |                  |         |                  |         |                  |         |                  |         |  |
| V Ka             | LPET (5)                  | Linear              | 15/100 | 40              | 10               | 10 | 1/1                    | 608                    |                       |                       |                        |                                                                      |         |                  |         |                  |         |                  |         |                  |         |                  |         |  |
| W La             | LPET (5)                  | Linear              | 15/100 | 40              | 10               | 10 | 1/1                    | 596                    | 739                   |                       |                        |                                                                      |         |                  |         |                  |         |                  |         |                  |         |                  |         |  |
| Sc Ka            | LPET (5)                  | Linear              | 15/100 | 40              | 10               | 10 | 1/1                    | 619                    | 1116                  |                       |                        | Ca I                                                                 | 535     |                  |         |                  |         |                  |         |                  |         |                  |         |  |
| Ta La            | LPET (5)                  | Linear              | 15/100 | 40              | 10               | 10 | 1/1                    | 601                    |                       |                       |                        |                                                                      |         |                  |         |                  |         |                  |         |                  |         |                  |         |  |
| Bi Ma            | LPET (5)                  | Linear              | 15/100 | 40              | 10               | 10 | 1/1                    | 568                    |                       |                       |                        | Ce II                                                                | 1101    |                  |         |                  |         |                  |         |                  |         |                  |         |  |

<sup>1</sup> See Full Standard List (Table S3) for standard number references
