# Supplementary material
Source: MDPI journal article supplement (https://www.mdpi.com/2075-163X/7/10/202)
Supplement: s1 [file s1 › Table S3.pdf]

Table S3: Full EPMA standard list

| Full Standard List |                                 |                          |           |                           |                          |           |                        |                          |
|--------------------|---------------------------------|--------------------------|-----------|---------------------------|--------------------------|-----------|------------------------|--------------------------|
| Ref. Num.          | Mineral/ Composition            | Manufacturer Information | Ref. Num. | Mineral/ Composition      | Manufacturer Information | Ref. Num. | Mineral/ Composition   | Manufacturer Information |
| 501                | Albite                          | Astimex                  | 608       | Vanadium                  | Astimex metal            | 815       | Tm metal               | Astimex REE block        |
| 502                | Almandine Garnet                | Astimex                  | 616       | Niobium                   | Astimex metal            | 816       | Y metal                | Astimex REE block        |
| 504                | Apatite                         | Astimex                  | 619       | Scandium                  | Astimex metal            | 817       | Yb metal               | Astimex REE block        |
| 513                | Celestite                       | Astimex                  | 627       | Pb Glass                  | NIST                     | 1100      | Lanthanum Phosphate    | Smithsonian REEPO4 std   |
| 520                | Crocoite                        | Astimex                  | 628       | Rare Earth Glass Standard | Drake and Weill glasses  | 1101      | Cerium Phosphate       | Smithsonian REEPO4 std   |
| 530                | Marcasite                       | Astimex                  | 629       | Huttonite (ThSiO4)        | DAS                      | 1102      | Praseodymium Phosphate | Smithsonian REEPO4 std   |
| 535                | Plagioclase                     | Astimex                  | 631       | UO2                       | DAS                      | 1103      | Neodymium Phosphate    | Smithsonian REEPO4 std   |
| 541                | Sanidine                        | Astimex                  | 632       | La Glass                  | University Edinburgh     | 1104      | Samarium Phosphate     | Smithsonian REEPO4 std   |
| 545                | 45 Tugtupite (Na4BeAlSi4O12Cl)  | Astimex                  | 633       | Ce Glass                  | University Edinburgh     | 1105      | Europium Phosphate     | Smithsonian REEPO4 std   |
| 551                | 51 Yttrium Al Garnet (Y3Al5O12) | Astimex                  | 634       | Gd Glass                  | University Edinburgh     | 1106      | Gadolinium Phosphate   | Smithsonian REEPO4 std   |
| 554                | Barite                          | P&H                      | 635       | Sm Glass                  | University Edinburgh     | 1107      | Terbium Phosphate      | Smithsonian REEPO4 std   |
| 556                | Chalcopyrite                    | P&H                      | 636       | Nd Glass                  | University Edinburgh     | 1108      | Dysprosium Phosphate   | Smithsonian REEPO4 std   |
| 557                | Rhodonite                       | P&H                      | 637       | Pr Glass                  | University Edinburgh     | 1109      | Holmium Phosphate      | Smithsonian REEPO4 std   |
| 558                | Wollastonite                    | P&H                      | 638       | Y2O3                      | University Edinburgh     | 1110      | Erbium Phosphate       | Smithsonian REEPO4 std   |
| 559                | Rutile                          | P&H                      | 739       | CaWO4                     | Taylor Block             | 1111      | Thulium Phosphate      | Smithsonian REEPO4 std   |
| 560                | Silver Telluride                | P&H                      | 740       | GaP                       | Taylor Block             | 1112      | Ytterbium Phosphate    | Smithsonian REEPO4 std   |
| 562                | Gallium Arsenide                | P&H                      | 804       | Dy metal                  | Astimex REE block        | 1115      | Yttrium Phosphate      | Smithsonian REEPO4 std   |
| 568                | Guajuvate Bi2Se3 Synthetic      | P&H                      | 805       | Er metal                  | Astimex REE block        | 1116      | Scandium Phosphate     | Smithsonian REEPO4 std   |
| 596                | Tungsten                        | Astimex metal            | 806       | EuF3                      | Astimex REE block        | 2001      | Apatite                | Astimex Apatite          |
| 599                | Zirconium                       | Astimex metal            | 808       | Ho metal                  | Astimex REE block        | 2002      | Apatite                | P&H                      |
| 601                | Tantalum                        | Astimex metal            | 814       | Tb metal                  | Astimex REE block        |           |                        |                          |
