# Supplementary material
Source: MDPI journal article supplement (https://www.mdpi.com/2075-163X/7/10/202)
Supplement: s1 [file s1 › Table S4.pdf]

**Table S4: Full details of analytical set-up for LA-ICP-MS analysis of REE fluorocarbonates.**

| Analysis Details |         |                |                           |
|------------------|---------|----------------|---------------------------|
| Mass             | Element | Dwell Time (s) | Avg Detection Limit (ppm) |
| 23               | Na      | 0.005          | 64.3                      |
| 27               | Al      | 0.005          | 4.66                      |
| 29               | Si      | 0.005          | 1385                      |
| 31               | P       | 0.005          | 208                       |
| 43               | Ca      | 0.01           | 892                       |
| 45               | Sc      | 0.01           | 1.16                      |
| 55               | Mn      | 0.01           | 3.55                      |
| 57               | Fe      | 0.01           | 73.0                      |
| 65               | Cu      | 0.01           | 5.21                      |
| 75               | As      | 0.01           | 6.85                      |
| 88               | Sr      | 0.01           | 0.067                     |
| 89               | Y       | 0.01           | 0.041                     |
| 90               | Zr      | 0.01           | 0.076                     |
| 93               | Nb      | 0.01           | 0.019                     |
| 137              | Ba      | 0.01           | 0.245                     |
| 139              | La      | 0.01           | 0.013                     |
| 141              | Pr      | 0.01           | 0.013                     |
| 146              | Nd      | 0.01           | 0.050                     |
| 147              | Sm      | 0.01           | 0.051                     |
| 153              | Eu      | 0.01           | 0.038                     |
| 157              | Gd      | 0.01           | 0.177                     |
| 159              | Tb      | 0.01           | 0.014                     |
| 163              | Dy      | 0.01           | 0.034                     |
| 165              | Ho      | 0.01           | 0.008                     |
| 166              | Er      | 0.01           | 0.032                     |
| 169              | Tm      | 0.01           | 0.008                     |
| 172              | Yb      | 0.01           | 0.036                     |
| 175              | Lu      | 0.01           | 0.011                     |
| 178              | Hf      | 0.01           | 0.029                     |
| 181              | Ta      | 0.01           | 0.010                     |
| 182              | W       | 0.01           | 0.039                     |
| 202              | Hg      | 0.01           | -                         |
| 204              | Pb      | 0.01           | 18.4                      |
| 206              | Pb      | 0.02           | 0.197                     |
| 207              | Pb      | 0.02           | 0.169                     |
| 208              | Pb      | 0.01           | 0.166                     |
| 209              | Bi      | 0.01           | 0.275                     |
| 232              | Th      | 0.03           | 0.009                     |
| 238              | U       | 0.03           | 0.008                     |

| Operating Conditions         |                |    |                              |
|------------------------------|----------------|----|------------------------------|
|                              | Spot Size (um) | Hz | Fluence (J/cm <sup>2</sup> ) |
| Unknowns                     | 9-29           | 5  | 3.5                          |
| Standards (GSD-1G, NIST-610) | 51             |    |                              |
