# Supplementary material
Source: MDPI journal article supplement (https://www.mdpi.com/2075-163X/7/10/202)
Supplement: s1 [file s1 › Table S5.pdf]

Table S5: Complete EPMA dataset for REE fluorocarbonates in weight percent (wt%).  
 Type bastnasite abbreviations: Mx-stby, Matrix-stubby; Mx-diss, Matrix-disseminated; Mx-f.g., Matrix-fine grained; CR, Clast Replacement; Irr., Irregular sulfide associated.

| Sample Type                           | RX6709 Mx-stby | RX6709 Mx-stby | RX6709 Mx-stby | RX6709 Mx-stby | RX6710 Mx-stby |
|---------------------------------------|----------------|----------------|----------------|----------------|----------------|----------------|----------------|----------------|----------------|----------------|----------------|----------------|----------------|----------------|----------------|----------------|----------------|----------------|----------------|
| Number                                | 17306          | 17307          | 17308          | 17309          | 305            | 306            | 307            | 308            | 296            | 297            | 298            | 299            | 292            | 293            | 294            | 295            | 287            | 288            | 309            |
| Ca                                    | 0.02           | 0.02           | <0.008         | <0.008         | 0.04           | 0.02           | 0.03           | 0.03           | 0.03           | 0.06           | 0.03           | 0.09           | 0.03           | 0.03           | 0.05           | 0.02           | 0.01           | 0.03           | 0.02           |
| K                                     | <0.008         | 0.01           | 0.009          | <0.008         | <0.008         | <0.008         | <0.008         | <0.008         | 0.01           | 0.01           | <0.008         | <0.008         | 0.009          | 0.009          | <0.008         | 0.01           | 0.02           | 0.02           | <0.008         |
| U                                     | <0.02          | <0.03          | <0.03          | <0.03          | <0.02          | <0.02          | <0.02          | <0.02          | <0.02          | <0.02          | <0.02          | <0.02          | <0.02          | <0.02          | <0.02          | <0.02          | <0.02          | <0.02          | <0.03          |
| La                                    | 16.8           | 21.3           | 16.3           | 20.9           | 15.4           | 15.8           | 14.2           | 14.9           | 17.3           | 20.0           | 17.3           | 15.5           | 18.7           | 17.7           | 17.6           | 18.7           | 17.9           | 14.1           | 14.6           |
| Ce                                    | 37.3           | 38.0           | 36.7           | 35.1           | 32.5           | 33.9           | 30.9           | 32.1           | 34.5           | 23.8           | 33.2           | 33.2           | 35.1           | 33.9           | 34.4           | 34.6           | 33.8           | 32.1           | 33.2           |
| F                                     | 7.6            | 7.3            | 7.3            | 7.4            | 7.3            | 7.4            | 7.3            | 7.2            | 7.3            | 7.4            | 7.4            | 7.2            | 7.7            | 7.4            | 7.4            | 7.3            | 7.4            | 7.3            | 7.4            |
| Fe                                    | 0.06           | 0.15           | 0.07           | 0.10           | 0.49           | <0.04          | <0.04          | <0.04          | 0.26           | 0.17           | 0.26           | 0.12           | 0.09           | 0.15           | 0.44           | 0.15           | 0.27           | 0.65           | 0.94           |
| Ho                                    | <0.09          | <0.09          | <0.09          | <0.09          | <0.09          | <0.09          | <0.09          | <0.09          | <0.09          | <0.09          | <0.09          | <0.09          | <0.09          | <0.09          | <0.09          | <0.09          | <0.09          | <0.09          | <0.09          |
| Yb                                    | <0.05          | <0.05          | <0.05          | <0.05          | <0.05          | <0.05          | <0.05          | 0.07           | <0.05          | <0.05          | <0.05          | <0.05          | <0.05          | <0.05          | <0.05          | <0.05          | <0.05          | <0.05          | <0.05          |
| Tm                                    | <0.05          | <0.05          | <0.05          | <0.05          | <0.05          | <0.05          | <0.05          | <0.05          | <0.05          | <0.05          | <0.05          | <0.05          | <0.05          | <0.05          | <0.05          | <0.05          | <0.05          | <0.05          | <0.05          |
| Er                                    | 0.06           | <0.05          | 0.06           | <0.05          | 0.08           | 0.06           | 0.09           | 0.14           | <0.05          | 0.10           | <0.05          | 0.11           | <0.05          | <0.05          | <0.05          | <0.05          | <0.05          | 0.08           | 0.09           |
| Gd                                    | 0.41           | 0.16           | 0.51           | 0.37           | 0.50           | 0.36           | 0.56           | 0.78           | 0.23           | 1.0            | 0.20           | 0.59           | 0.13           | 0.09           | 0.21           | 0.09           | 0.14           | 0.59           | 0.55           |
| Dy                                    | 0.18           | <0.05          | 0.22           | 0.20           | 0.24           | 0.08           | 0.29           | 0.42           | <0.05          | 0.35           | <0.05          | 0.27           | <0.05          | <0.05          | <0.05          | <0.05          | <0.05          | 0.24           | 0.22           |
| Tb                                    | 0.08           | 0.08           | 0.08           | 0.08           | 0.08           | <0.05          | 0.08           | 0.11           | <0.05          | 0.05           | <0.05          | 0.06           | <0.05          | 0.05           | 0.06           | <0.05          | <0.05          | 0.06           | 0.07           |
| Sm                                    | 1.1            | 0.59           | 1.3            | 0.95           | 1.1            | 0.98           | 1.3            | 1.5            | 0.79           | 1.7            | 0.75           | 1.2            | 0.52           | 0.59           | 0.71           | 0.44           | 0.59           | 1.4            | 1.4            |
| Eu                                    | 0.54           | 0.27           | 0.64           | 0.45           | 0.46           | 0.43           | 0.67           | 0.73           | 0.37           | 0.76           | 0.35           | 0.58           | 0.26           | 0.24           | 0.31           | 0.23           | 0.27           | 0.60           | 0.60           |
| Nd                                    | 11.1           | 9.5            | 12.4           | 11.8           | 11.3           | 11.2           | 12.4           | 12.6           | 10.5           | 13.6           | 10.4           | 11.8           | 9.2            | 9.3            | 9.9            | 8.6            | 9.7            | 12.1           | 12.4           |
| Pr                                    | 3.7            | 3.5            | 3.9            | 4.1            | 3.6            | 3.7            | 3.8            | 3.8            | 3.5            | 4.0            | 3.5            | 3.7            | 3.4            | 3.5            | 3.5            | 3.3            | 3.3            | 3.7            | 3.8            |
| Na                                    | <0.03          | <0.03          | <0.03          | <0.03          | <0.03          | <0.03          | <0.03          | <0.03          | <0.03          | <0.03          | <0.03          | <0.03          | <0.03          | <0.03          | <0.03          | <0.03          | <0.03          | <0.03          | <0.03          |
| Si                                    | <0.01          | <0.01          | <0.01          | <0.01          | <0.01          | <0.01          | <0.01          | <0.01          | <0.01          | <0.01          | <0.01          | <0.01          | <0.01          | <0.01          | <0.01          | <0.01          | <0.01          | <0.01          | <0.01          |
| Al                                    | <0.01          | 0.07           | <0.01          | <0.01          | 0.03           | <0.01          | <0.01          | <0.01          | <0.01          | <0.01          | <0.01          | <0.01          | <0.01          | <0.01          | <0.01          | <0.01          | <0.01          | 0.58           | 0.03           |
| Sr                                    | 0.02           | 0.02           | 0.02           | 0.02           | 0.03           | 0.02           | 0.02           | <0.01          | 0.05           | 0.02           | 0.02           | 0.04           | 0.02           | 0.02           | 0.02           | 0.03           | 0.03           | 0.21           | 0.04           |
| As                                    | <0.02          | <0.02          | <0.02          | <0.02          | <0.02          | <0.02          | <0.02          | <0.02          | <0.02          | <0.02          | <0.02          | <0.02          | <0.02          | <0.02          | <0.02          | <0.02          | <0.02          | <0.02          | <0.02          |
| P                                     | <0.01          | <0.01          | <0.01          | <0.01          | <0.01          | <0.01          | <0.01          | <0.01          | <0.01          | <0.01          | <0.01          | <0.01          | <0.01          | <0.01          | <0.01          | <0.01          | <0.01          | <0.01          | <0.01          |
| S                                     | 0.07           | 0.04           | 0.03           | <0.01          | 0.04           | 0.04           | 0.03           | 0.02           | 0.02           | <0.01          | 0.06           | 0.03           | 0.05           | 0.05           | 0.03           | 0.02           | 0.03           | 0.10           | 0.03           |
| Cl                                    | 0.02           | 0.02           | <0.01          | 0.02           | 0.04           | 0.02           | 0.01           | 0.02           | 0.01           | 0.01           | <0.01          | 0.01           | 0.01           | 0.02           | <0.01          | 0.01           | 0.02           | 0.02           | 0.02           |
| Th                                    | <0.02          | <0.02          | <0.02          | <0.02          | 0.02           | <0.02          | <0.02          | <0.02          | 0.05           | <0.02          | <0.02          | 0.17           | <0.02          | <0.02          | <0.02          | <0.02          | <0.02          | <0.02          | <0.02          |
| Pb                                    | <0.03          | <0.03          | <0.03          | <0.03          | <0.03          | <0.03          | <0.03          | <0.03          | <0.03          | <0.03          | <0.03          | <0.03          | <0.03          | <0.03          | <0.03          | <0.03          | <0.03          | <0.03          | <0.03          |
| Y                                     | 0.35           | 0.07           | 0.50           | 0.41           | 0.70           | 0.34           | 0.95           | 1.2            | 0.19           | 1.0            | 0.15           | 0.85           | 0.07           | 0.08           | 0.14           | 0.04           | 0.05           | 0.73           | 0.70           |
| Nb                                    | <0.02          | <0.02          | <0.02          | <0.02          | <0.02          | <0.02          | <0.02          | <0.02          | <0.02          | <0.02          | <0.02          | <0.02          | <0.02          | <0.02          | <0.02          | <0.02          | <0.02          | <0.02          | <0.02          |
| Zr                                    | <0.02          | <0.02          | <0.02          | <0.02          | <0.02          | <0.02          | <0.02          | <0.02          | <0.02          | <0.02          | <0.02          | <0.02          | <0.02          | <0.02          | <0.02          | <0.02          | <0.02          | <0.02          | <0.02          |
| '<' indicates minimum detection limit |                |                |                |                |                |                |                |                |                |                |                |                |                |                |                |                |                |                |                |

## Appendix 4: EMPA data (cont.)

| RX6710<br>Mx-stby | RX6710<br>Mx-stby | RX6728<br>Mx-stby |
|-------------------|-------------------|-------------------|-------------------|-------------------|-------------------|-------------------|-------------------|-------------------|-------------------|-------------------|-------------------|-------------------|-------------------|-------------------|-------------------|-------------------|-------------------|-------------------|-------------------|
| 310               | 311               | 268               | 269               | 270               | 271               | 272               | 273               | 258               | 259               | 260               | 261               | 247               | 248               | 249               | 250               | 251               | 252               | 253               | 254               |
| 0.01              | 0.04              | 0.02              | 0.07              | 0.04              | 0.01              | 0.02              | 0.08              | <0.008            | <0.008            | 0.009             | 0.07              | <0.008            | 0.02              | 0.02              | 0.03              | 0.05              | <0.008            | 0.03              | 0.03              |
| 0.01              | <0.008            | <0.008            | <0.008            | <0.008            | <0.008            | <0.008            | <0.008            | <0.008            | <0.008            | 0.01              | 0.009             | <0.008            | 0.009             | <0.008            | <0.008            | <0.008            | <0.008            | <0.008            | 0.01              |
| <0.02             | <0.02             | <0.03             | <0.03             | <0.02             | <0.03             | <0.02             | <0.02             | <0.02             | <0.02             | <0.02             | <0.02             | <0.02             | <0.02             | <0.02             | <0.03             | <0.02             | <0.02             | <0.02             | <0.02             |
| 15.2              | 18.9              | 15.4              | 17.2              | 17.8              | 15.3              | 18.1              | 15.5              | 14.1              | 14.9              | 15.2              | 17.3              | 18.8              | 17.6              | 17.3              | 16.2              | 16.9              | 15.8              | 17.9              | 18.9              |
| 33.9              | 34.1              | 34.5              | 33.8              | 33.0              | 33.8              | 34.7              | 32.3              | 33.0              | 33.2              | 33.9              | 33.4              | 35.8              | 34.2              | 33.0              | 34.6              | 32.5              | 33.7              | 36.0              | 35.2              |
| 7.3               | 7.3               | 7.2               | 7.3               | 7.6               | 7.4               | 7.3               | 7.4               | 7.2               | 7.0               | 7.0               | 7.3               | 7.3               | 7.3               | 7.0               | 7.3               | 7.4               | 7.1               | 7.1               | 7.2               |
| 0.35              | 0.69              | 0.56              | 0.17              | 0.18              | 0.09              | 0.12              | 0.23              | <0.04             | 0.12              | <0.04             | 0.07              | <0.04             | <0.04             | <0.04             | 0.05              | 0.05              | 0.35              | 0.11              | 0.68              |
| <0.09             | <0.09             | <0.09             | <0.09             | <0.09             | <0.09             | <0.09             | <0.09             | <0.09             | <0.09             | <0.09             | <0.09             | <0.09             | <0.09             | <0.09             | <0.09             | <0.09             | <0.09             | <0.09             | <0.09             |
| <0.05             | <0.05             | <0.05             | <0.05             | <0.05             | <0.05             | <0.05             | <0.05             | <0.05             | <0.05             | <0.05             | <0.05             | <0.05             | <0.05             | <0.05             | <0.05             | <0.05             | <0.05             | <0.05             | <0.05             |
| <0.05             | <0.05             | <0.05             | <0.05             | <0.05             | <0.05             | <0.05             | <0.05             | <0.05             | <0.05             | <0.05             | <0.05             | <0.05             | <0.05             | <0.05             | <0.05             | <0.05             | <0.05             | <0.05             | <0.05             |
| <0.05             | <0.05             | 0.08              | 0.08              | <0.05             | <0.05             | <0.05             | <0.05             | 0.11              | 0.07              | <0.05             | <0.05             | 0.05              | <0.05             | <0.05             | 0.10              | <0.05             | <0.05             | <0.05             | <0.05             |
| 0.37              | 0.13              | 0.66              | 0.57              | 0.38              | 0.47              | 0.16              | 0.21              | 0.60              | 0.47              | 0.42              | 0.24              | 0.11              | 0.19              | 0.48              | 0.59              | 0.41              | 0.37              | 0.18              | 0.13              |
| 0.16              | <0.05             | 0.24              | 0.22              | 0.07              | 0.15              | <0.05             | <0.05             | 0.26              | 0.15              | 0.13              | 0.06              | <0.05             | <0.05             | 0.19              | 0.27              | 0.10              | 0.12              | <0.05             | <0.05             |
| 0.07              | <0.05             | 0.07              | 0.07              | 0.05              | <0.05             | <0.05             | <0.05             | 0.07              | 0.06              | 0.05              | <0.05             | <0.05             | <0.05             | <0.05             | 0.07              | <0.05             | <0.05             | 0.05              | <0.05             |
| 1.1               | 0.57              | 1.4               | 1.0               | 0.96              | 1.2               | 0.60              | 0.77              | 1.4               | 1.2               | 1.1               | 0.87              | 0.44              | 0.59              | 1.1               | 1.3               | 1.1               | 0.99              | 0.74              | 0.63              |
| 0.48              | 0.28              | 0.64              | 0.50              | 0.41              | 0.54              | 0.29              | 0.35              | 0.62              | 0.51              | 0.49              | 0.39              | 0.20              | 0.29              | 0.48              | 0.61              | 0.53              | 0.47              | 0.33              | 0.29              |
| 11.7              | 9.4               | 12.9              | 10.5              | 10.7              | 12.2              | 9.6               | 10.7              | 12.6              | 12.0              | 11.5              | 10.4              | 8.9               | 9.8               | 10.6              | 12.4              | 11.8              | 11.7              | 10.6              | 9.7               |
| 3.8               | 3.4               | 3.8               | 3.4               | 3.5               | 3.8               | 3.4               | 3.7               | 3.9               | 3.7               | 3.7               | 3.5               | 3.3               | 3.4               | 3.5               | 3.9               | 3.5               | 3.7               | 3.7               | 3.5               |
| <0.03             | <0.03             | <0.03             | <0.03             | <0.03             | <0.03             | <0.03             | <0.03             | <0.03             | <0.03             | <0.03             | <0.03             | <0.03             | <0.03             | <0.03             | <0.03             | <0.03             | <0.03             | <0.03             | <0.03             |
| <0.01             | <0.01             | <0.01             | <0.01             | <0.01             | <0.01             | <0.01             | <0.01             | <0.01             | <0.01             | <0.01             | <0.01             | <0.01             | <0.01             | <0.01             | <0.01             | <0.01             | <0.01             | <0.01             | <0.01             |
| <0.01             | <0.01             | <0.01             | <0.01             | <0.01             | <0.01             | <0.01             | <0.01             | <0.01             | <0.01             | <0.01             | <0.01             | <0.01             | <0.01             | <0.01             | <0.01             | <0.01             | <0.01             | <0.01             | <0.01             |
| <0.01             | 0.03              | 0.02              | 0.02              | 0.03              | <0.01             | 0.02              | 0.02              | 0.02              | 0.02              | 0.02              | 0.02              | 0.03              | 0.03              | 0.03              | <0.01             | 0.04              | 0.02              | 0.03              | 0.02              |
| <0.02             | <0.02             | <0.02             | <0.02             | <0.02             | <0.02             | <0.02             | <0.02             | <0.02             | <0.02             | <0.02             | <0.02             | <0.02             | <0.02             | <0.02             | <0.02             | <0.02             | <0.02             | <0.02             | <0.02             |
| <0.01             | <0.01             | <0.01             | <0.01             | <0.01             | <0.01             | <0.01             | <0.01             | <0.01             | <0.01             | <0.01             | <0.01             | <0.01             | <0.01             | <0.01             | <0.01             | <0.01             | <0.01             | <0.01             | <0.01             |
| 0.03              | 0.04              | 0.03              | 0.02              | 0.04              | 0.02              | 0.05              | 0.07              | 0.04              | 0.03              | 0.04              | 0.03              | 0.03              | 0.06              | <0.01             | 0.03              | 0.02              | 0.02              | 0.03              | 0.06              |
| 0.02              | <0.01             | 0.02              | 0.01              | 0.01              | <0.01             | 0.01              | 0.01              | 0.02              | <0.01             | 0.02              | 0.02              | 0.02              | <0.01             | <0.01             | 0.02              | 0.01              | 0.01              | 0.02              | 0.02              |
| <0.02             | <0.02             | <0.02             | <0.02             | <0.02             | <0.02             | <0.02             | <0.02             | <0.02             | <0.02             | <0.02             | <0.02             | <0.02             | <0.02             | <0.02             | <0.02             | <0.02             | <0.02             | <0.02             | <0.02             |
| <0.03             | <0.03             | <0.03             | <0.03             | <0.03             | <0.03             | <0.03             | <0.03             | <0.03             | <0.03             | <0.03             | <0.03             | <0.03             | <0.03             | <0.03             | <0.03             | <0.03             | <0.03             | <0.03             | <0.03             |
| 0.40              | 0.10              | 0.64              | 0.66              | 0.34              | 0.47              | 0.09              | 0.26              | 0.82              | 0.37              | 0.38              | 0.20              | 0.04              | 0.09              | 0.59              | 0.83              | 0.38              | 0.34              | 0.19              | 0.09              |
| <0.02             | <0.02             | <0.02             | <0.02             | <0.02             | <0.02             | <0.02             | <0.02             | <0.02             | <0.02             | <0.02             | <0.02             | <0.02             | <0.02             | <0.02             | <0.02             | <0.02             | <0.02             | <0.02             | <0.02             |
| <0.02             | <0.02             | <0.02             | <0.02             | <0.02             | <0.02             | <0.02             | <0.02             | <0.02             | <0.02             | <0.02             | <0.02             | <0.02             | <0.02             | <0.02             | <0.02             | <0.02             | <0.02             | <0.02             | <0.02             |
|                   |                   |                   |                   |                   |                   |                   |                   |                   |                   |                   |                   |                   |                   |                   |                   |                   |                   |                   |                   |

## Appendix 4: EMPA data (cont.)

| RX6728<br>Mx-stby | RX6711<br>Mx-diss | RX6711<br>Mx-diss | RX6711<br>Mx-diss | RX6711<br>Mx-diss | RX6712<br>Mx-diss | RX6712<br>Mx-diss | RX6715<br>Mx-diss | RX6715<br>Mx-diss | RX6715<br>Mx-diss | RX6715<br>Mx-diss | RX6723<br>Mx-diss | RX6723<br>Mx-diss |
|-------------------|-------------------|-------------------|-------------------|-------------------|-------------------|-------------------|-------------------|-------------------|-------------------|-------------------|-------------------|-------------------|-------------------|-------------------|-------------------|-------------------|-------------------|-------------------|
| 255               | 256               | 257               | 235               | 236               | 237               | 238               | 17327             | 17328             | 17329             | 17330             | 496               | 497               | 17352             | 17354             | 17355             | 17357             | 477               | 478               |
| 0.08              | 0.07              | 0.02              | 0.04              | 0.06              | 0.03              | 0.03              | 0.17              | 1.1               | 1.1               | 0.91              | 0.11              | 0.03              | 0.08              | 0.13              | 0.02              | 0.08              | 0.30              | 0.32              |
| <0.008            | <0.009            | <0.008            | <0.008            | 0.01              | <0.008            | <0.008            | 0.02              | 0.06              | 0.08              | 0.09              | 0.03              | 0.06              | 0.12              | 0.07              | 0.08              | 0.13              | 0.14              | 0.03              |
| <0.02             | <0.02             | <0.02             | <0.02             | <0.02             | <0.02             | <0.02             | <0.03             | <0.03             | <0.03             | <0.03             | <0.02             | <0.02             | <0.02             | <0.03             | 0.08              | <0.03             | <0.02             | <0.03             |
| 16.7              | 17.2              | 16.6              | 17.7              | 17.9              | 18.2              | 16.8              | 10.0              | 16.8              | 17.6              | 17.3              | 14.9              | 15.6              | 15.2              | 20.1              | 14.5              | 18.0              | 13.9              | 16.9              |
| 33.3              | 34.6              | 33.1              | 33.1              | 33.7              | 33.8              | 34.9              | 33.8              | 33.8              | 34.0              | 33.6              | 34.1              | 34.1              | 31.2              | 37.3              | 30.5              | 35.2              | 30.3              | 33.0              |
| 7.8               | 7.3               | 7.3               | 7.3               | 7.6               | 7.3               | 7.4               | 7.1               | 6.6               | 6.6               | 6.6               | 7.1               | 7.3               | 7.1               | 7.5               | 7.6               | 7.7               | 7.0               | 7.4               |
| 0.21              | 0.28              | 0.41              | 0.07              | 0.10              | 0.06              | 0.07              | 0.74              | 0.62              | 1.0               | 0.86              | <0.04             | 0.05              | 1.0               | 0.84              | 0.88              | 1.3               | 0.49              | 0.57              |
| <0.09             | <0.09             | <0.09             | <0.09             | <0.09             | <0.09             | <0.09             | <0.09             | <0.09             | <0.09             | <0.09             | <0.09             | <0.09             | <0.09             | <0.09             | <0.09             | <0.09             | <0.09             | <0.09             |
| <0.05             | <0.05             | <0.05             | <0.05             | <0.05             | <0.05             | <0.05             | <0.05             | <0.05             | <0.05             | <0.05             | <0.05             | <0.05             | <0.05             | <0.05             | <0.05             | <0.05             | <0.05             | <0.05             |
| <0.05             | <0.05             | <0.05             | <0.05             | <0.05             | <0.05             | <0.05             | <0.05             | <0.05             | <0.05             | <0.05             | <0.05             | <0.05             | <0.05             | <0.05             | <0.05             | <0.05             | <0.05             | <0.05             |
| <0.05             | <0.05             | 0.07              | <0.05             | <0.05             | 0.08              | <0.05             | 0.14              | 0.06              | 0.09              | <0.05             | 0.07              | 0.07              | <0.05             | <0.05             | <0.05             | <0.05             | <0.05             | <0.05             |
| 0.11              | 0.33              | 0.55              | 0.43              | 0.29              | 0.32              | 0.22              | 1.2               | 0.43              | 0.30              | 0.32              | 0.46              | 0.41              | 0.12              | 0.46              | 0.40              | 0.38              | 0.65              | 0.47              |
| <0.05             | 0.08              | 0.18              | 0.11              | 0.06              | <0.05             | 0.05              | 0.57              | 0.20              | 0.18              | 0.14              | 0.16              | 0.21              | <0.04             | 0.20              | 0.16              | 0.10              | 0.18              | 0.13              |
| <0.04             | 0.07              | 0.07              | <0.05             | <0.05             | <0.05             | <0.05             | 0.17              | 0.07              | 0.09              | 0.06              | 0.06              | 0.07              | <0.04             | 0.11              | 0.09              | 0.07              | 0.05              | <0.05             |
| 0.64              | 0.91              | 1.0               | 1.1               | 0.81              | 0.89              | 0.74              | 1.9               | 0.89              | 0.76              | 0.84              | 0.98              | 0.90              | 0.59              | 0.95              | 1.0               | 1.0               | 1.4               | 1.0               |
| 0.27              | 0.42              | 0.47              | 0.49              | 0.39              | 0.38              | 0.31              | 0.60              | 0.42              | 0.37              | 0.37              | 0.56              | 0.50              | 0.26              | 0.48              | 0.48              | 0.50              | 0.54              | 0.43              |
| 9.5               | 11.3              | 10.6              | 11.2              | 10.7              | 10.6              | 10.5              | 16.2              | 10.2              | 8.9               | 9.7               | 10.1              | 9.4               | 7.3               | 10.4              | 10.9              | 9.5               | 11.6              | 10.5              |
| 3.5               | 3.8               | 3.6               | 3.6               | 3.4               | 3.5               | 3.7               | 4.6               | 3.4               | 3.2               | 3.2               | 3.5               | 3.5               | 2.2               | 3.7               | 3.6               | 3.0               | 3.4               | 3.5               |
| <0.03             | <0.03             | <0.03             | <0.03             | <0.03             | <0.03             | <0.03             | <0.03             | <0.03             | 0.08              | 0.06              | <0.03             | <0.03             | <0.03             | <0.03             | <0.03             | <0.03             | <0.03             | <0.03             |
| <0.01             | <0.01             | <0.01             | <0.01             | <0.01             | <0.01             | <0.01             | <0.01             | <0.01             | <0.01             | <0.01             | <0.01             | <0.01             | <0.01             | <0.01             | <0.01             | <0.01             | <0.01             | <0.01             |
| <0.01             | <0.01             | <0.01             | <0.01             | <0.01             | <0.01             | <0.01             | 0.04              | 0.01              | 0.02              | 0.03              | <0.01             | <0.01             | <0.01             | 0.13              | <0.01             | 0.11              | 0.22              | 0.03              |
| 0.03              | 0.03              | 0.02              | 0.03              | 0.02              | 0.04              | 0.02              | <0.01             | 0.24              | 0.18              | 0.17              | 0.04              | 0.05              | 0.02              | 0.04              | 0.03              | 0.04              | 0.06              | 0.12              |
| <0.02             | <0.02             | <0.02             | <0.02             | <0.02             | <0.02             | <0.02             | <0.02             | <0.02             | <0.02             | <0.02             | <0.02             | <0.02             | <0.02             | <0.02             | <0.02             | <0.02             | <0.02             | <0.02             |
| <0.01             | <0.01             | <0.01             | <0.01             | <0.01             | <0.01             | <0.01             | <0.01             | <0.01             | <0.01             | <0.01             | <0.01             | <0.01             | <0.01             | <0.01             | <0.01             | <0.01             | <0.01             | <0.01             |
| 0.09              | 0.03              | 0.03              | 0.04              | <0.01             | 0.02              | 0.02              | <0.01             | 0.08              | 0.09              | 0.07              | <0.01             | <0.01             | <0.01             | <0.01             | <0.01             | <0.01             | 0.03              | <0.01             |
| 0.02              | 0.01              | 0.01              | 0.02              | 0.01              | 0.02              | 0.02              | 0.02              | 0.07              | 0.08              | 0.06              | 0.02              | 0.01              | 0.02              | 0.04              | <0.01             | 0.06              | 0.02              | 0.02              |
| <0.02             | <0.02             | <0.02             | <0.02             | <0.02             | <0.02             | <0.02             | 0.26              | 1.3               | 1.2               | 0.93              | 0.17              | 0.47              | 0.30              | 0.37              | 0.43              | 0.31              | 0.36              | 0.37              |
| <0.02             | <0.03             | <0.03             | <0.03             | <0.03             | <0.03             | <0.03             | <0.03             | <0.03             | 0.06              | 0.03              | <0.03             | <0.03             | 0.04              | <0.03             | <0.03             | <0.03             | <0.03             | <0.03             |
| 0.09              | 0.42              | 0.50              | 0.35              | 0.34              | 0.22              | 0.16              | 1.5               | 0.89              | 0.86              | 0.65              | 0.28              | 0.53              | 0.12              | 0.20              | 0.27              | 0.15              | 0.45              | 0.36              |
| <0.02             | <0.02             | <0.02             | <0.02             | <0.02             | <0.02             | <0.02             | <0.02             | <0.02             | <0.02             | <0.02             | <0.02             | <0.02             | <0.02             | <0.02             | <0.02             | <0.02             | <0.02             | <0.02             |
| <0.02             | <0.02             | <0.02             | <0.02             | <0.02             | <0.02             | <0.02             | <0.02             | <0.02             | <0.02             | <0.02             | <0.02             | <0.02             | <0.02             | <0.02             | <0.02             | <0.02             | <0.02             | <0.02             |
|                   |                   |                   |                   |                   |                   |                   |                   |                   |                   |                   |                   |                   |                   |                   |                   |                   |                   |                   |

## Appendix 4: EMPA data (cont.)

| RX6723<br>Mx-diss | RX6725<br>Mx-diss | RX6725<br>Mx-diss | RX6716<br>Mx-f.g. |
|-------------------|-------------------|-------------------|-------------------|-------------------|-------------------|-------------------|-------------------|-------------------|-------------------|-------------------|-------------------|-------------------|-------------------|-------------------|-------------------|-------------------|-------------------|-------------------|
| 488               | 489               | 490               | 491               | 492               | 493               | 494               | 495               | 534               | 535               | 17331             | 17332             | 17333             | 17334             | 17335             | 17336             | 17337             | 17338             | 17339             |
| 0.07              | 0.32              | 0.34              | 0.29              | 0.20              | 0.05              | 0.23              | 0.13              | 0.15              | 0.11              | 0.15              | 0.13              | 0.04              | 0.44              | 0.12              | 0.07              | 0.04              | 0.19              | 0.03              |
| 0.01              | 0.01              | <0.008            | 0.01              | <0.008            | <0.008            | <0.008            | 0.06              | 0.02              | 0.02              | <0.008            | 0.02              | <0.008            | 0.01              | <0.008            | 0.03              | <0.008            | 0.01              | <0.008            |
| <0.02             | <0.03             | 0.03              | <0.03             | <0.03             | <0.02             | <0.02             | <0.03             | <0.02             | <0.02             | <0.03             | <0.02             | <0.02             | <0.02             | <0.02             | <0.03             | 0.10              | <0.02             | <0.02             |
| 12.3              | 15.3              | 14.0              | 14.8              | 14.7              | 11.8              | 13.3              | 15.9              | 17.1              | 18.1              | 26.0              | 23.5              | 25.2              | 23.9              | 23.5              | 27.0              | 24.5              | 24.5              | 24.8              |
| 33.4              | 33.1              | 31.5              | 34.4              | 34.4              | 33.0              | 31.6              | 34.1              | 34.8              | 35.3              | 36.0              | 32.5              | 34.5              | 34.0              | 35.4              | 36.6              | 34.3              | 33.9              | 32.7              |
| 7.5               | 7.3               | 7.2               | 7.5               | 7.8               | 7.3               | 7.2               | 7.6               | 6.9               | 7.3               | 7.2               | 7.1               | 7.4               | 7.2               | 7.3               | 7.7               | 7.4               | 7.4               | 7.5               |
| <0.04             | <0.04             | 0.37              | 0.06              | 0.13              | <0.04             | <0.04             | 0.08              | 0.24              | 0.37              | <0.04             | 0.19              | <0.04             | 0.20              | 0.13              | <0.04             | <0.04             | <0.04             | 0.16              |
| <0.09             | <0.09             | <0.09             | <0.10             | <0.09             | <0.09             | <0.09             | <0.10             | <0.09             | <0.09             | <0.09             | <0.09             | <0.09             | <0.09             | <0.09             | <0.09             | <0.09             | <0.09             | <0.09             |
| <0.05             | <0.05             | <0.05             | <0.05             | <0.05             | <0.05             | <0.05             | <0.05             | <0.05             | <0.05             | <0.05             | <0.05             | <0.05             | <0.05             | <0.05             | <0.05             | <0.05             | <0.05             | <0.05             |
| <0.05             | <0.05             | <0.05             | <0.05             | <0.05             | <0.05             | <0.05             | <0.05             | <0.05             | <0.05             | <0.05             | <0.05             | <0.05             | <0.05             | <0.05             | 0.09              | <0.05             | <0.05             | <0.05             |
| <0.05             | 0.16              | 0.07              | 0.06              | 0.06              | 0.11              | 0.07              | 0.14              | 0.10              | 0.10              | <0.05             | <0.05             | <0.05             | 0.06              | <0.05             | <0.05             | <0.05             | <0.05             | <0.05             |
| 0.96              | 0.95              | 0.44              | 0.73              | 0.66              | 1.1               | 0.85              | 1.1               | 0.39              | 0.46              | 0.14              | 0.09              | 0.17              | 0.17              | 0.14              | 0.18              | 0.11              | 0.14              | <0.08             |
| 0.30              | 0.45              | 0.19              | 0.25              | 0.22              | 0.54              | 0.37              | 0.52              | 0.25              | 0.24              | 0.05              | <0.05             | 0.06              | 0.12              | 0.08              | 0.10              | 0.09              | 0.07              | 0.05              |
| 0.07              | 0.12              | <0.04             | 0.08              | 0.07              | 0.12              | 0.09              | 0.14              | 0.09              | 0.07              | 0.08              | 0.05              | 0.08              | 0.08              | 0.06              | 0.11              | 0.08              | 0.07              | 0.06              |
| 1.8               | 1.4               | 0.85              | 1.4               | 1.3               | 1.8               | 1.5               | 1.5               | 0.85              | 0.73              | 0.30              | 0.28              | 0.36              | 0.46              | 0.37              | 0.41              | 0.35              | 0.37              | 0.32              |
| 0.67              | 0.55              | 0.33              | 0.53              | 0.51              | 0.65              | 0.53              | 0.59              | 0.37              | 0.38              | 0.23              | 0.20              | 0.24              | 0.26              | 0.22              | 0.29              | 0.23              | 0.18              | 0.23              |
| 14.6              | 11.9              | 9.6               | 12.8              | 12.5              | 14.4              | 12.6              | 12.2              | 9.1               | 9.0               | 6.3               | 5.9               | 6.1               | 6.4               | 6.4               | 6.9               | 6.2               | 6.1               | 5.9               |
| 4.3               | 3.5               | 3.2               | 3.8               | 3.9               | 4.2               | 3.9               | 3.9               | 3.4               | 3.3               | 2.6               | 2.5               | 2.6               | 2.8               | 2.8               | 2.9               | 2.6               | 2.6               | 2.5               |
| <0.03             | <0.03             | <0.03             | <0.03             | <0.03             | <0.03             | <0.03             | 0.18              | <0.03             | <0.03             | <0.03             | <0.03             | <0.03             | <0.03             | <0.03             | <0.03             | <0.03             | <0.03             | <0.03             |
| <0.01             | <0.01             | <0.01             | <0.01             | <0.01             | <0.01             | <0.01             | <0.01             | <0.01             | <0.01             | <0.01             | <0.01             | <0.01             | <0.01             | <0.01             | <0.01             | <0.01             | <0.01             | <0.01             |
| <0.01             | <0.01             | <0.01             | <0.01             | <0.01             | <0.01             | <0.01             | 0.29              | <0.01             | <0.01             | <0.01             | <0.01             | <0.01             | <0.01             | <0.01             | <0.01             | <0.01             | <0.01             | <0.01             |
| 0.05              | 0.10              | 0.07              | 0.09              | 0.06              | 0.04              | 0.11              | 0.06              | 0.02              | 0.05              | 0.03              | 0.12              | 0.02              | 0.03              | 0.03              | 0.02              | 0.04              | 0.02              | 0.02              |
| <0.02             | <0.02             | <0.02             | <0.02             | <0.02             | <0.02             | <0.02             | <0.02             | <0.02             | <0.02             | <0.02             | <0.02             | <0.02             | <0.02             | <0.02             | <0.02             | <0.02             | <0.02             | <0.02             |
| <0.01             | <0.01             | <0.01             | <0.01             | <0.01             | <0.01             | <0.01             | <0.01             | <0.01             | <0.01             | <0.01             | <0.01             | <0.01             | <0.01             | <0.01             | <0.01             | <0.01             | <0.01             | <0.01             |
| <0.01             | <0.01             | 0.02              | <0.01             | 0.02              | <0.01             | <0.01             | <0.01             | <0.01             | <0.01             | <0.01             | <0.01             | <0.01             | <0.01             | <0.01             | <0.01             | <0.01             | 0.02              | <0.01             |
| 0.02              | <0.01             | 0.04              | 0.03              | 0.02              | 0.02              | 0.01              | <0.01             | <0.01             | 0.01              | 0.03              | 0.01              | 0.02              | 0.04              | 0.05              | 0.01              | <0.01             | 0.08              | 0.03              |
| 0.07              | 0.56              | 0.71              | 0.33              | 0.25              | 0.16              | 0.09              | 0.31              | 0.22              | 0.21              | <0.02             | <0.02             | <0.02             | <0.02             | <0.02             | <0.02             | <0.02             | <0.02             | <0.02             |
| <0.03             | 0.03              | 0.03              | <0.03             | <0.03             | <0.03             | <0.03             | <0.03             | <0.03             | <0.03             | <0.03             | <0.03             | <0.03             | <0.03             | <0.03             | <0.03             | <0.02             | <0.03             | <0.03             |
| 0.64              | 1.0               | 0.93              | 0.62              | 0.58              | 0.73              | 0.90              | 1.2               | 0.89              | 0.94              | 0.21              | 0.24              | 0.22              | 0.36              | 0.17              | 0.29              | 0.23              | 0.18              | 0.19              |
| <0.02             | <0.02             | <0.02             | <0.02             | <0.02             | <0.02             | <0.02             | <0.02             | <0.02             | <0.02             | <0.02             | <0.02             | <0.02             | <0.02             | <0.02             | <0.02             | <0.02             | <0.02             | <0.02             |
| <0.02             | <0.02             | <0.02             | <0.02             | <0.02             | <0.02             | <0.02             | <0.02             | <0.02             | <0.02             | <0.02             | <0.02             | <0.02             | <0.02             | <0.02             | <0.02             | <0.02             | <0.02             | <0.02             |
|                   |                   |                   |                   |                   |                   |                   |                   |                   |                   |                   |                   |                   |                   |                   |                   |                   |                   |                   |

Appendix 4: EMPA data (cont.)

| RX6716<br>Mx-f.g. | RX6717<br>Mx-f.g. | RX6717<br>Mx-f.g. | RX6717<br>Mx-f.g. | RX6717<br>Mx-f.g. | RX6717<br>Mx-f.g. | RX6718<br>Mx-f.g. | RX6718<br>Mx-f.g. | RX6718<br>Mx-f.g. |
|-------------------|-------------------|-------------------|-------------------|-------------------|-------------------|-------------------|-------------------|-------------------|-------------------|-------------------|-------------------|-------------------|-------------------|-------------------|-------------------|-------------------|-------------------|
| 17340             | 17341             | 17342             | 17343             | 17344             | 17345             | 17346             | 17347             | 17348             | 17349             | 17388             | 17389             | 17393             | 17394             | 17395             | 312               | 313               | 315               |
| 0.15              | 0.17              | 0.27              | 0.13              | 0.03              | 0.01              | 0.16              | 0.22              | 0.16              | 0.10              | 0.29              | 0.42              | 0.17              | 0.42              | 0.38              | 0.42              | 0.37              | 0.36              |
| 0.02              | 0.02              | <0.008            | 0.01              | 0.03              | 0.04              | 0.01              | <0.008            | <0.008            | <0.008            | 0.01              | 0.01              | <0.008            | <0.008            | <0.008            | 0.06              | 0.08              | 0.03              |
| <0.03             | <0.03             | <0.02             | <0.02             | <0.03             | <0.03             | <0.02             | <0.02             | <0.02             | <0.02             | <0.02             | 0.07              | <0.03             | <0.03             | <0.03             | 0.13              | 0.05              | <0.02             |
| 27.3              | 25.5              | 23.7              | 24.6              | 30.2              | 33.2              | 27.5              | 25.3              | 26.3              | 24.1              | 21.0              | 22.7              | 22.8              | 22.9              | 22.2              | 22.5              | 22.8              | 21.4              |
| 37.3              | 35.9              | 34.2              | 34.3              | 35.4              | 34.7              | 32.6              | 34.5              | 36.1              | 34.8              | 31.9              | 35.2              | 36.8              | 36.9              | 37.6              | 32.1              | 30.7              | 32.4              |
| 7.2               | 7.3               | 7.1               | 7.4               | 7.3               | 7.0               | 7.0               | 7.4               | 7.4               | 7.4               | 8.0               | 6.8               | 7.2               | 7.2               | 7.1               | 6.8               | 7.2               | 6.9               |
| 0.05              | <0.04             | 0.07              | 0.12              | <0.04             | <0.04             | 0.17              | 0.09              | 0.26              | 0.04              | 0.78              | 0.11              | 0.04              | 0.22              | 0.04              | 0.06              | 0.06              | <0.04             |
| <0.09             | <0.09             | <0.09             | <0.09             | <0.10             | <0.10             | <0.09             | <0.09             | <0.09             | <0.09             | <0.09             | <0.09             | <0.09             | <0.09             | <0.09             | <0.09             | <0.09             | <0.09             |
| 0.06              | <0.05             | <0.05             | <0.05             | <0.05             | <0.05             | <0.05             | <0.05             | <0.05             | <0.05             | <0.05             | <0.05             | <0.05             | <0.05             | <0.05             | <0.05             | 0.06              | <0.05             |
| 0.05              | <0.05             | <0.05             | <0.05             | 0.06              | <0.05             | <0.05             | <0.05             | <0.05             | <0.05             | <0.05             | <0.05             | <0.05             | <0.05             | <0.05             | <0.05             | <0.05             | <0.05             |
| <0.05             | <0.05             | 0.06              | <0.05             | <0.05             | <0.05             | <0.05             | <0.05             | 0.07              | 0.06              | <0.05             | 0.09              | 0.06              | 0.05              | <0.05             | 0.08              | <0.05             | 0.09              |
| 0.18              | 0.17              | 0.16              | 0.18              | 0.14              | <0.09             | <0.08             | 0.12              | 0.18              | 0.18              | 0.18              | 0.34              | 0.22              | 0.22              | 0.16              | 0.25              | 0.34              | 0.31              |
| 0.10              | 0.09              | 0.12              | 0.07              | <0.05             | <0.05             | <0.05             | <0.05             | 0.09              | 0.09              | 0.13              | 0.18              | 0.12              | 0.12              | 0.09              | 0.12              | 0.18              | 0.16              |
| 0.10              | 0.10              | 0.10              | 0.05              | 0.07              | 0.06              | <0.05             | 0.06              | 0.07              | 0.07              | 0.06              | 0.08              | 0.05              | 0.06              | 0.09              | 0.05              | 0.09              | 0.06              |
| 0.41              | 0.34              | 0.44              | 0.34              | 0.33              | 0.17              | 0.21              | 0.33              | 0.37              | 0.38              | 0.49              | 0.58              | 0.42              | 0.47              | 0.44              | 0.51              | 0.51              | 0.49              |
| 0.25              | 0.19              | 0.25              | 0.22              | 0.20              | 0.12              | 0.12              | 0.16              | 0.26              | 0.24              | 0.26              | 0.29              | 0.22              | 0.27              | 0.22              | 0.22              | 0.27              | 0.28              |
| 6.8               | 6.5               | 6.6               | 6.3               | 6.2               | 5.2               | 5.9               | 6.0               | 6.5               | 6.4               | 6.7               | 7.0               | 6.8               | 7.1               | 7.1               | 6.3               | 6.7               | 6.7               |
| 2.9               | 2.7               | 2.6               | 2.5               | 2.5               | 2.3               | 2.3               | 2.6               | 2.6               | 2.7               | 2.6               | 2.8               | 2.8               | 2.9               | 3.0               | 2.5               | 2.6               | 2.7               |
| <0.03             | <0.03             | <0.03             | <0.03             | <0.03             | <0.03             | <0.03             | <0.03             | <0.03             | <0.03             | <0.03             | <0.03             | <0.03             | <0.03             | <0.03             | <0.03             | <0.03             | <0.03             |
| <0.01             | <0.01             | <0.01             | <0.01             | <0.01             | <0.01             | <0.01             | <0.01             | <0.01             | <0.01             | <0.01             | <0.01             | <0.01             | <0.01             | <0.01             | <0.01             | <0.01             | <0.01             |
| <0.01             | <0.01             | <0.01             | <0.01             | <0.01             | <0.01             | <0.01             | <0.01             | <0.01             | <0.01             | <0.01             | <0.01             | <0.01             | <0.01             | 0.06              | <0.01             | 0.17              | <0.01             |
| 0.03              | 0.03              | 0.02              | 0.04              | 0.03              | 0.03              | 0.05              | 0.02              | 0.03              | 0.04              | 0.06              | 0.07              | 0.08              | 0.06              | 0.05              | 0.07              | 0.07              | 0.07              |
| <0.02             | <0.02             | <0.02             | <0.02             | <0.02             | <0.02             | <0.02             | <0.02             | <0.02             | <0.02             | <0.02             | <0.02             | <0.02             | <0.02             | <0.02             | <0.02             | <0.02             | <0.02             |
| <0.01             | <0.01             | <0.01             | <0.01             | <0.01             | <0.01             | <0.01             | <0.01             | <0.01             | <0.01             | <0.01             | <0.01             | <0.01             | <0.01             | <0.01             | <0.01             | <0.01             | <0.01             |
| <0.01             | <0.01             | <0.01             | <0.01             | <0.01             | <0.01             | <0.01             | <0.01             | <0.01             | <0.01             | 0.02              | 0.02              | <0.01             | 0.01              | 0.02              | <0.01             | <0.01             | <0.01             |
| 0.03              | 0.04              | 0.07              | 0.04              | 0.01              | 0.01              | 0.02              | 0.03              | 0.05              | 0.03              | 0.01              | 0.04              | <0.01             | 0.04              | 0.05              | 0.04              | 0.03              | 0.03              |
| <0.02             | <0.02             | <0.02             | <0.02             | <0.02             | <0.02             | <0.02             | <0.02             | <0.02             | <0.02             | 0.02              | <0.02             | <0.02             | <0.02             | <0.02             | 0.04              | 0.07              | 0.05              |
| <0.03             | <0.03             | <0.03             | <0.03             | <0.03             | <0.03             | <0.03             | <0.03             | <0.03             | <0.03             | <0.03             | <0.03             | <0.03             | <0.03             | <0.03             | <0.02             | <0.03             | <0.03             |
| 0.22              | 0.20              | 0.27              | 0.26              | 0.11              | 0.04              | 0.06              | 0.23              | 0.20              | 0.38              | 0.62              | 0.79              | 0.52              | 0.55              | 0.36              | 0.65              | 0.66              | 0.73              |
| <0.02             | <0.02             | <0.02             | <0.02             | <0.02             | <0.02             | <0.02             | <0.02             | <0.02             | <0.02             | <0.02             | <0.02             | <0.02             | <0.02             | <0.02             | <0.02             | <0.02             | <0.02             |
| <0.02             | <0.02             | <0.02             | <0.02             | <0.02             | <0.02             | <0.02             | <0.02             | <0.02             | <0.02             | <0.02             | <0.02             | <0.02             | <0.02             | <0.02             | <0.02             | <0.02             | <0.02             |
|                   |                   |                   |                   |                   |                   |                   |                   |                   |                   |                   |                   |                   |                   |                   |                   |                   |                   |

## Appendix 4: EMPA data (cont.)

| RX6718<br>Mx-f.g. | RX6719<br>Mx-f.g. |
|-------------------|-------------------|-------------------|-------------------|-------------------|-------------------|-------------------|-------------------|-------------------|-------------------|-------------------|-------------------|-------------------|-------------------|-------------------|-------------------|-------------------|-------------------|-------------------|-------------------|-------------------|
| 316               | 317               | 318               | 319               | 320               | 321               | 322               | 323               | 324               | 325               | 300               | 301               | 302               | 303               | 304               | 326               | 327               | 328               | 329               | 331               | 332               |
| 0.43              | 0.42              | 0.41              | 0.40              | 0.34              | 0.38              | 0.44              | 0.47              | 0.40              | 0.47              | 0.74              | 0.77              | 0.59              | 0.76              | 0.57              | 0.75              | 0.81              | 0.69              | 0.75              | 0.54              | 0.53              |
| 0.07              | 0.05              | <0.008            | <0.008            | 0.03              | 0.03              | 0.06              | 0.03              | 0.08              | 0.05              | 0.02              | <0.008            | <0.008            | 0.03              | 0.18              | 0.02              | 0.008             | 0.03              | 0.01              | 0.33              | 0.02              |
| 0.05              | 5.7               | 0.05              | 0.06              | 0.05              | 0.06              | <0.02             | <0.03             | <0.03             | 0.08              | <0.02             | <0.02             | 0.30              | 0.05              | 0.03              | 0.03              | <0.03             | 0.07              | <0.03             | <0.02             | 0.04              |
| 22.2              | 18.5              | 22.0              | 22.3              | 23.7              | 22.2              | 21.6              | 22.8              | 22.1              | 22.1              | 23.0              | 22.9              | 22.1              | 20.9              | 20.3              | 25.2              | 24.5              | 22.7              | 23.7              | 21.0              | 22.8              |
| 32.2              | 29.1              | 33.2              | 32.6              | 34.2              | 33.4              | 32.5              | 35.3              | 35.3              | 32.9              | 32.6              | 32.6              | 31.5              | 32.1              | 28.2              | 35.0              | 34.9              | 32.0              | 33.8              | 29.4              | 31.9              |
| 7.0               | 7.3               | 7.1               | 7.1               | 6.8               | 7.0               | 7.0               | 7.0               | 7.1               | 7.0               | 7.2               | 7.9               | 7.3               | 7.3               | 6.7               | 6.1               | 6.2               | 6.2               | 6.8               | 7.5               | 7.2               |
| 0.13              | 0.82              | <0.04             | <0.04             | <0.04             | <0.04             | 0.06              | <0.04             | 0.08              | 0.18              | 0.11              | 0.04              | 0.37              | 0.08              | <0.04             | 0.12              | 0.09              | 0.50              | 0.09              | 0.13              | 0.29              |
| <0.09             | <0.09             | <0.09             | <0.09             | <0.09             | <0.09             | <0.09             | <0.10             | <0.10             | <0.09             | <0.09             | <0.09             | <0.09             | <0.09             | <0.09             | <0.10             | <0.09             | <0.09             | <0.09             | <0.09             | <0.09             |
| 0.07              | <0.05             | <0.05             | <0.05             | <0.05             | <0.05             | <0.05             | <0.05             | <0.05             | <0.05             | <0.05             | <0.05             | <0.05             | <0.05             | <0.05             | <0.05             | <0.05             | <0.05             | <0.05             | <0.05             | <0.05             |
| 0.08              | <0.05             | <0.05             | <0.05             | <0.05             | <0.05             | <0.05             | <0.05             | <0.05             | <0.05             | <0.05             | <0.05             | <0.05             | <0.05             | <0.05             | <0.05             | <0.05             | <0.05             | <0.05             | <0.05             | <0.05             |
| 0.10              | 0.09              | 0.07              | 0.08              | 0.06              | 0.10              | 0.06              | 0.08              | 0.09              | <0.05             | 0.07              | <0.05             | 0.06              | 0.06              | <0.05             | <0.05             | 0.06              | 0.07              | 0.06              | 0.05              | <0.05             |
| 0.32              | 0.26              | 0.33              | 0.30              | 0.30              | 0.41              | 0.29              | 0.35              | 0.45              | 0.26              | 0.22              | 0.22              | 0.22              | <0.08             | 0.15              | 0.24              | 0.22              | 0.17              | 0.24              | 0.21              | 0.23              |
| 0.09              | 0.12              | 0.16              | 0.15              | 0.14              | 0.17              | 0.15              | 0.18              | 0.20              | 0.12              | 0.09              | 0.08              | 0.08              | 0.07              | 0.07              | 0.07              | 0.08              | 0.05              | 0.07              | 0.08              | 0.10              |
| <0.04             | <0.04             | 0.08              | 0.08              | 0.06              | 0.07              | 0.06              | 0.07              | 0.08              | 0.05              | 0.07              | <0.05             | 0.06              | <0.05             | <0.04             | 0.05              | <0.05             | <0.05             | 0.05              | 0.05              | 0.05              |
| 0.34              | 0.52              | 0.50              | 0.49              | 0.50              | 0.54              | 0.50              | 0.54              | 0.56              | 0.40              | 0.41              | 0.38              | 0.31              | 0.33              | 0.37              | 0.39              | 0.37              | 0.34              | 0.42              | 0.35              | 0.41              |
| 0.19              | 0.24              | 0.25              | 0.23              | 0.26              | 0.32              | 0.27              | 0.29              | 0.30              | 0.21              | 0.19              | 0.17              | 0.09              | 0.15              | 0.14              | 0.21              | 0.17              | 0.16              | 0.22              | 0.17              | 0.17              |
| 5.8               | 6.8               | 6.8               | 6.6               | 6.9               | 7.0               | 6.9               | 7.3               | 7.0               | 6.4               | 6.2               | 6.3               | 5.9               | 6.1               | 5.4               | 6.5               | 6.5               | 5.7               | 6.1               | 5.4               | 6.0               |
| 2.2               | 2.6               | 2.7               | 2.6               | 2.7               | 2.6               | 2.6               | 2.7               | 2.6               | 2.5               | 2.5               | 2.5               | 2.3               | 2.5               | 2.3               | 2.5               | 2.5               | 2.3               | 2.4               | 2.2               | 2.4               |
| <0.03             | <0.03             | <0.03             | <0.03             | <0.03             | <0.03             | <0.03             | <0.03             | <0.03             | <0.03             | <0.03             | 0.06              | <0.03             | 0.08              | 0.43              | <0.03             | <0.03             | <0.03             | 0.09              | 0.05              | <0.03             |
| <0.01             | <0.01             | <0.01             | <0.01             | <0.01             | <0.01             | <0.01             | <0.01             | <0.01             | <0.01             | <0.01             | <0.01             | <0.01             | <0.01             | <0.01             | <0.01             | <0.01             | <0.01             | <0.01             | <0.01             | <0.01             |
| 0.35              | 0.37              | <0.01             | <0.01             | <0.01             | <0.01             | 0.06              | <0.01             | 0.03              | <0.01             | <0.01             | <0.01             | <0.01             | <0.01             | <0.01             | <0.01             | <0.01             | <0.01             | <0.01             | 0.60              | <0.01             |
| 0.07              | 0.10              | 0.08              | 0.07              | 0.06              | 0.08              | 0.10              | 0.08              | 0.15              | 0.06              | 0.12              | 0.13              | 0.12              | 0.14              | 0.12              | 0.14              | 0.15              | 0.12              | 0.13              | 0.11              | 0.10              |
| <0.02             | <0.02             | <0.02             | <0.02             | <0.02             | <0.02             | <0.02             | <0.02             | <0.02             | <0.02             | <0.02             | <0.02             | <0.02             | <0.02             | <0.02             | <0.02             | <0.02             | <0.02             | <0.02             | <0.02             | <0.02             |
| <0.01             | <0.01             | <0.01             | <0.01             | <0.01             | <0.01             | <0.01             | <0.01             | <0.01             | <0.01             | <0.01             | <0.01             | <0.01             | <0.01             | <0.01             | <0.01             | <0.01             | <0.01             | <0.01             | <0.01             | <0.01             |
| 0.01              | 0.05              | <0.01             | 0.01              | 0.02              | <0.01             | 0.02              | <0.01             | 0.01              | <0.01             | 0.01              | 0.03              | 0.02              | 0.03              | 0.02              | 0.03              | 0.02              | 0.12              | 0.02              | <0.01             | <0.01             |
| 0.03              | 0.05              | 0.04              | 0.02              | 0.03              | 0.02              | 0.04              | 0.04              | 0.05              | 0.06              | 0.05              | 0.06              | 0.06              | 0.07              | 0.03              | 0.06              | 0.07              | 0.07              | 0.06              | 0.03              | 0.04              |
| <0.02             | <0.02             | 0.12              | 0.12              | 0.05              | 0.09              | 0.06              | 0.26              | 0.27              | 0.18              | 0.02              | 0.04              | 0.07              | 0.09              | 0.04              | 0.05              | 0.04              | 0.02              | 0.06              | <0.02             | 0.02              |
| <0.03             | 0.04              | <0.03             | <0.03             | <0.03             | <0.03             | <0.03             | <0.03             | <0.03             | <0.03             | <0.03             | <0.03             | <0.03             | <0.02             | <0.02             | <0.03             | <0.03             | <0.03             | <0.03             | <0.02             | <0.03             |
| 0.60              | 0.68              | 0.73              | 0.74              | 0.75              | 0.73              | 0.72              | 0.73              | 0.91              | 0.63              | 0.53              | 0.49              | 0.63              | 0.45              | 0.36              | 0.55              | 0.52              | 0.44              | 0.47              | 0.54              | 0.63              |
| <0.02             | <0.02             | <0.02             | <0.02             | <0.02             | <0.02             | <0.02             | <0.02             | <0.02             | <0.02             | <0.02             | <0.02             | <0.02             | <0.02             | <0.02             | <0.02             | <0.02             | <0.02             | <0.02             | <0.02             | <0.02             |
| <0.02             | <0.02             | <0.02             | <0.02             | <0.02             | <0.02             | <0.02             | <0.02             | <0.02             | <0.02             | <0.02             | <0.02             | <0.02             | <0.02             | <0.02             | <0.02             | <0.02             | <0.02             | <0.02             | <0.02             | <0.02             |
|                   |                   |                   |                   |                   |                   |                   |                   |                   |                   |                   |                   |                   |                   |                   |                   |                   |                   |                   |                   |                   |

Appendix 4: EMPA data (cont.)

| RX6719<br>Mx-f.g. | RX6719<br>Mx-f.g. | RX6719<br>Mx-f.g. | RX6719<br>Mx-f.g. | RX6723<br>Mx-f.g. | RX6724<br>Mx-f.g. | RX6724<br>Mx-f.g. | RX6724<br>Mx-f.g. | RX6724<br>Mx-f.g. | RX6724<br>Mx-f.g. | RX6724<br>Mx-f.g. |
|-------------------|-------------------|-------------------|-------------------|-------------------|-------------------|-------------------|-------------------|-------------------|-------------------|-------------------|-------------------|-------------------|-------------------|-------------------|-------------------|-------------------|-------------------|-------------------|-------------------|
| 333               | 334               | 335               | 337               | 498               | 499               | 500               | 501               | 502               | 503               | 479               | 504               | 505               | 506               | 544               | 545               | 551               | 17475             | 17476             | 17477             |
| 0.64              | 0.90              | 0.61              | 0.49              | 0.27              | 0.24              | 0.33              | 0.38              | 0.27              | 0.30              | 0.20              | 0.45              | 0.14              | 0.31              | 0.40              | 0.40              | 0.42              | 0.58              | 0.50              | 0.48              |
| <0.008            | 0.38              | 0.52              | <0.008            | <0.008            | <0.008            | <0.008            | 0.02              | 0.01              | 0.02              | 0.01              | 0.03              | <0.009            | 0.02              | 0.05              | 0.04              | 0.05              | 0.01              | 0.02              | 0.009             |
| <0.02             | 0.76              | <0.02             | 0.07              | 0.05              | <0.03             | <0.03             | <0.02             | <0.03             | <0.03             | <0.03             | 0.04              | <0.02             | <0.02             | <0.03             | <0.02             | <0.02             | <0.02             | <0.03             | <0.03             |
| 23.7              | 19.7              | 20.0              | 23.9              | 14.0              | 14.8              | 14.6              | 13.2              | 16.1              | 15.7              | 13.5              | 15.6              | 13.8              | 15.6              | 23.0              | 23.5              | 18.7              | 19.7              | 20.7              | 19.3              |
| 33.7              | 27.9              | 28.0              | 33.5              | 33.4              | 34.7              | 34.6              | 32.0              | 34.5              | 32.8              | 33.4              | 31.8              | 33.3              | 33.5              | 31.6              | 31.4              | 35.0              | 34.0              | 36.6              | 38.9              |
| 7.0               | 7.6               | 7.7               | 7.0               | 7.2               | 7.4               | 7.2               | 7.1               | 7.4               | 7.3               | 7.3               | 7.1               | 7.3               | 7.3               | 7.1               | 7.2               | 7.1               | 7.4               | 7.5               | 7.5               |
| <0.04             | 2.1               | 0.52              | 0.06              | 0.14              | 0.12              | 0.06              | 0.19              | <0.04             | 0.25              | 0.64              | 1.0               | 1.4               | 0.25              | 0.04              | 0.06              | 0.30              | 0.14              | 0.05              | 0.18              |
| <0.09             | <0.09             | <0.09             | <0.09             | <0.09             | <0.09             | <0.10             | <0.09             | <0.09             | <0.09             | <0.09             | <0.09             | <0.09             | <0.09             | <0.09             | <0.09             | <0.09             | <0.09             | <0.09             | <0.09             |
| <0.05             | <0.05             | <0.05             | <0.05             | <0.05             | <0.05             | <0.05             | <0.05             | <0.05             | <0.05             | <0.05             | 0.07              | <0.05             | <0.05             | <0.05             | 0.06              | <0.05             | <0.05             | <0.05             | <0.05             |
| <0.05             | <0.05             | <0.05             | <0.05             | <0.05             | <0.05             | <0.05             | <0.05             | <0.05             | <0.05             | <0.05             | <0.05             | <0.05             | <0.05             | <0.05             | <0.05             | <0.05             | <0.05             | <0.05             | <0.05             |
| <0.05             | <0.05             | <0.05             | 0.05              | 0.16              | 0.10              | 0.09              | 0.07              | 0.12              | 0.11              | 0.08              | 0.14              | 0.06              | 0.08              | 0.11              | 0.12              | 0.09              | 0.12              | 0.10              | 0.09              |
| 0.24              | 0.17              | 0.20              | 0.21              | 1.2               | 0.76              | 0.83              | 0.88              | 0.83              | 0.74              | 0.89              | 0.79              | 0.80              | 0.85              | 0.31              | 0.33              | 0.28              | 0.28              | 0.33              | 0.31              |
| 0.08              | 0.09              | 0.10              | 0.06              | 0.62              | 0.26              | 0.28              | 0.28              | 0.32              | 0.30              | 0.29              | 0.39              | 0.26              | 0.33              | 0.20              | 0.21              | 0.18              | 0.20              | 0.24              | 0.26              |
| 0.05              | 0.08              | 0.12              | 0.07              | 0.12              | 0.10              | 0.09              | 0.06              | 0.08              | 0.08              | 0.08              | 0.10              | 0.08              | 0.12              | 0.07              | 0.07              | 0.05              | 0.05              | 0.10              | 0.10              |
| 0.36              | 0.40              | 0.27              | 0.38              | 1.7               | 1.4               | 1.5               | 1.6               | 1.3               | 1.2               | 1.7               | 1.3               | 1.4               | 1.4               | 0.50              | 0.55              | 0.41              | 0.50              | 0.50              | 0.52              |
| 0.19              | 0.14              | 0.19              | 0.16              | 0.63              | 0.55              | 0.56              | 0.59              | 0.52              | 0.49              | 0.62              | 0.43              | 0.51              | 0.55              | 0.23              | 0.22              | 0.19              | 0.22              | 0.21              | 0.25              |
| 6.4               | 4.6               | 4.5               | 6.3               | 13.1              | 12.8              | 13.2              | 13.0              | 11.8              | 10.8              | 13.5              | 10.5              | 12.8              | 11.8              | 6.7               | 6.6               | 5.4               | 6.5               | 5.9               | 6.0               |
| 2.5               | 1.8               | 1.7               | 2.5               | 3.8               | 3.9               | 3.9               | 3.7               | 3.6               | 3.5               | 3.9               | 3.3               | 3.9               | 3.7               | 2.7               | 2.6               | 2.1               | 2.5               | 2.3               | 2.3               |
| 0.05              | 0.08              | 0.15              | 0.04              | <0.03             | <0.03             | <0.03             | <0.03             | <0.03             | <0.03             | <0.03             | <0.03             | <0.03             | <0.03             | <0.03             | <0.03             | <0.03             | 0.03              | <0.03             | <0.03             |
| <0.01             | <0.01             | <0.01             | <0.01             | <0.01             | <0.01             | <0.01             | <0.01             | <0.01             | <0.01             | <0.01             | <0.01             | <0.01             | <0.01             | <0.01             | <0.01             | <0.01             | <0.01             | <0.01             | <0.01             |
| <0.01             | 0.89              | 0.73              | <0.01             | <0.01             | <0.01             | 0.03              | 0.08              | <0.01             | <0.01             | 0.02              | <0.01             | 0.05              | <0.01             | <0.01             | <0.01             | <0.01             | <0.01             | <0.01             | <0.01             |
| 0.11              | 0.13              | 0.12              | 0.12              | 0.06              | 0.08              | 0.06              | 0.08              | 0.11              | 0.13              | 0.05              | 0.04              | 0.03              | 0.10              | 0.04              | 0.05              | 0.05              | 0.05              | 0.06              | 0.06              |
| <0.02             | <0.02             | <0.02             | <0.02             | <0.02             | <0.02             | <0.02             | <0.02             | <0.02             | <0.02             | <0.02             | <0.02             | <0.02             | <0.02             | <0.02             | <0.02             | <0.02             | <0.02             | <0.02             | <0.02             |
| <0.01             | <0.01             | <0.01             | <0.01             | <0.01             | <0.01             | <0.01             | <0.01             | <0.01             | <0.01             | <0.01             | <0.01             | <0.01             | <0.01             | <0.01             | <0.01             | <0.01             | <0.01             | <0.01             | <0.01             |
| 0.01              | <0.01             | 0.01              | 0.02              | 0.02              | 0.02              | 0.02              | 0.03              | <0.01             | 0.02              | 0.02              | 0.07              | 0.02              | 0.01              | 0.01              | <0.01             | 0.02              | <0.01             | <0.01             | 0.04              |
| 0.04              | 0.07              | 0.03              | 0.04              | 0.03              | 0.03              | 0.03              | 0.03              | 0.01              | 0.02              | 0.03              | 0.12              | 0.09              | 0.05              | 0.03              | 0.03              | 0.04              | 0.04              | 0.05              | 0.07              |
| 0.04              | <0.02             | <0.02             | <0.02             | 0.24              | 0.13              | 0.17              | 0.30              | 0.32              | 0.19              | 0.41              | 0.09              | 0.13              | 0.13              | 0.17              | 0.13              | 0.17              | 0.16              | 0.18              | 0.16              |
| <0.03             | 0.04              | <0.02             | <0.03             | <0.03             | <0.03             | <0.03             | <0.03             | <0.03             | <0.03             | <0.03             | <0.03             | <0.03             | <0.03             | 0.03              | <0.03             | 0.05              | 0.03              | <0.03             | <0.03             |
| 0.50              | 0.55              | 0.49              | 0.50              | 1.4               | 0.72              | 0.78              | 0.73              | 0.88              | 0.83              | 0.70              | 1.2               | 0.63              | 0.98              | 0.90              | 0.99              | 1.1               | 1.0               | 1.2               | 1.1               |
| <0.02             | <0.02             | <0.02             | <0.02             | <0.02             | <0.02             | <0.02             | <0.02             | <0.02             | <0.02             | <0.02             | <0.02             | <0.02             | <0.02             | <0.02             | <0.02             | <0.02             | <0.02             | <0.02             | <0.02             |
| <0.02             | <0.02             | <0.02             | <0.02             | <0.02             | <0.02             | <0.02             | <0.02             | <0.02             | <0.02             | <0.02             | <0.02             | <0.02             | <0.02             | <0.02             | <0.02             | <0.02             | <0.02             | <0.02             | <0.02             |
|                   |                   |                   |                   |                   |                   |                   |                   |                   |                   |                   |                   |                   |                   |                   |                   |                   |                   |                   |                   |

## Appendix 4: EMPA data (cont.)

| RX6724<br>Mx-f.g. | RX6726<br>Mx-f.g. | RX6726<br>Mx-f.g. | RX6726<br>Mx-f.g. | RX6726<br>Mx-f.g. | RX6727<br>Mx-f.g. |
|-------------------|-------------------|-------------------|-------------------|-------------------|-------------------|-------------------|-------------------|-------------------|-------------------|-------------------|-------------------|-------------------|-------------------|-------------------|-------------------|-------------------|-------------------|-------------------|-------------------|
| 552               | 553               | 554               | 555               | 556               | 557               | 558               | 559               | 17434             | 17435             | 17437             | 17440             | 274               | 275               | 276               | 277               | 278               | 279               | 280               | 281               |
| 0.35              | 0.32              | 0.50              | 0.34              | 0.34              | 0.35              | 0.32              | 0.37              | 0.15              | 0.04              | 0.25              | 0.06              | 0.23              | 0.27              | 0.22              | 0.09              | 0.11              | 0.52              | 0.27              | 0.49              |
| <0.008            | 0.01              | <0.008            | 0.02              | 0.01              | 0.01              | 0.01              | <0.008            | 0.02              | 0.04              | 0.009             | 0.02              | 0.03              | 0.06              | 0.02              | 0.04              | 0.009             | 0.02              | <0.008            | 0.009             |
| <0.02             | <0.02             | <0.02             | <0.02             | <0.02             | <0.02             | <0.02             | <0.02             | <0.02             | <0.02             | <0.03             | <0.03             | 0.03              | <0.02             | <0.02             | <0.02             | <0.02             | <0.02             | 0.08              | 0.12              |
| 21.5              | 29.6              | 24.2              | 25.1              | 24.9              | 18.8              | 28.6              | 25.3              | 20.3              | 21.6              | 22.2              | 20.6              | 21.8              | 18.8              | 18.8              | 19.7              | 19.4              | 22.0              | 19.4              | 22.2              |
| 31.1              | 18.8              | 31.7              | 30.2              | 30.0              | 38.7              | 25.9              | 28.5              | 35.9              | 36.0              | 35.2              | 36.1              | 30.7              | 31.4              | 32.0              | 33.8              | 31.6              | 31.3              | 33.6              | 32.9              |
| 7.1               | 7.0               | 7.2               | 6.9               | 7.1               | 7.3               | 7.2               | 7.2               | 7.1               | 7.5               | 7.4               | 7.2               | 7.3               | 7.0               | 7.3               | 7.4               | 7.2               | 7.1               | 7.0               | 7.0               |
| <0.04             | 0.20              | <0.04             | 0.05              | <0.04             | <0.04             | <0.04             | <0.04             | 1.0               | 0.94              | <0.04             | 0.67              | <0.04             | 0.08              | <0.04             | <0.04             | <0.04             | 1.7               | 0.39              | 0.25              |
| <0.09             | <0.09             | <0.09             | <0.09             | <0.09             | <0.09             | <0.09             | <0.09             | <0.09             | <0.09             | <0.09             | <0.09             | <0.09             | <0.09             | <0.09             | <0.09             | <0.09             | <0.09             | <0.09             | <0.09             |
| 0.10              | 0.06              | <0.05             | <0.05             | <0.05             | <0.05             | <0.05             | 0.10              | <0.05             | <0.05             | <0.05             | <0.05             | <0.05             | <0.05             | <0.05             | <0.05             | <0.05             | <0.05             | <0.05             | <0.05             |
| <0.05             | <0.05             | <0.05             | <0.05             | <0.05             | <0.05             | <0.05             | <0.05             | <0.05             | <0.05             | <0.05             | <0.05             | <0.05             | <0.05             | <0.05             | <0.05             | <0.05             | <0.05             | <0.05             | <0.05             |
| 0.09              | 0.10              | 0.11              | 0.08              | 0.11              | 0.15              | 0.08              | 0.07              | 0.06              | 0.08              | 0.07              | 0.07              | 0.07              | 0.06              | <0.05             | 0.10              | 0.08              | <0.05             | 0.09              | <0.05             |
| 0.35              | 0.48              | 0.37              | 0.38              | 0.37              | 0.43              | 0.44              | 0.34              | 0.30              | 0.27              | 0.24              | 0.34              | 0.31              | 0.25              | 0.35              | 0.35              | 0.34              | 0.18              | 0.42              | 0.25              |
| 0.15              | 0.16              | 0.22              | 0.20              | 0.18              | 0.25              | 0.19              | 0.15              | 0.20              | 0.12              | 0.08              | 0.07              | 0.10              | 0.14              | 0.14              | 0.18              | 0.17              | 0.09              | 0.20              | 0.10              |
| 0.05              | 0.06              | 0.05              | 0.05              | <0.05             | 0.08              | 0.08              | 0.05              | 0.10              | 0.06              | 0.05              | 0.06              | 0.07              | 0.06              | 0.05              | 0.06              | 0.05              | 0.05              | 0.08              | <0.05             |
| 0.56              | 0.83              | 0.49              | 0.57              | 0.60              | 0.49              | 0.60              | 0.59              | 0.78              | 0.76              | 0.54              | 0.76              | 0.54              | 0.57              | 0.70              | 0.64              | 0.63              | 0.43              | 0.69              | 0.48              |
| 0.25              | 0.41              | 0.23              | 0.26              | 0.29              | 0.22              | 0.33              | 0.28              | 0.38              | 0.38              | 0.27              | 0.41              | 0.30              | 0.32              | 0.39              | 0.38              | 0.41              | 0.22              | 0.44              | 0.29              |
| 7.2               | 10.4              | 6.4               | 7.1               | 7.5               | 5.7               | 7.8               | 7.6               | 8.9               | 8.6               | 7.9               | 8.9               | 7.0               | 7.4               | 7.6               | 7.5               | 7.2               | 6.8               | 7.9               | 7.1               |
| 2.7               | 3.7               | 2.5               | 2.8               | 2.9               | 2.1               | 3.2               | 2.9               | 3.2               | 3.1               | 2.9               | 3.2               | 2.6               | 2.7               | 2.9               | 2.9               | 2.7               | 2.6               | 2.9               | 2.6               |
| <0.03             | <0.03             | <0.03             | <0.03             | <0.03             | <0.03             | <0.03             | <0.03             | <0.03             | <0.03             | <0.03             | <0.03             | <0.03             | <0.03             | <0.03             | <0.03             | <0.03             | <0.03             | <0.03             | <0.03             |
| <0.01             | <0.01             | <0.01             | <0.01             | <0.01             | <0.01             | <0.01             | <0.01             | <0.01             | <0.01             | <0.01             | <0.01             | <0.01             | <0.01             | <0.01             | <0.01             | <0.01             | <0.01             | <0.01             | <0.01             |
| 0.03              | <0.01             | <0.01             | <0.01             | <0.01             | <0.01             | <0.01             | <0.01             | <0.01             | <0.01             | <0.01             | <0.01             | <0.01             | <0.01             | <0.01             | 0.02              | <0.01             | 0.04              | <0.01             | <0.01             |
| 0.04              | 0.04              | 0.05              | 0.04              | 0.03              | 0.06              | 0.04              | 0.03              | 0.04              | 0.06              | 0.07              | 0.02              | 0.07              | 0.05              | 0.05              | 0.07              | 0.05              | 0.04              | 0.04              | 0.06              |
| <0.02             | <0.02             | <0.02             | <0.02             | <0.02             | <0.02             | <0.02             | <0.02             | <0.02             | <0.02             | <0.02             | <0.02             | <0.02             | <0.02             | <0.02             | <0.02             | <0.02             | <0.02             | <0.02             | <0.02             |
| <0.01             | <0.01             | <0.01             | <0.01             | <0.01             | <0.01             | <0.01             | <0.01             | <0.01             | <0.01             | <0.01             | <0.01             | <0.01             | <0.01             | <0.01             | <0.01             | <0.01             | <0.01             | <0.01             | <0.01             |
| <0.01             | <0.01             | <0.01             | 0.04              | <0.01             | 0.02              | 0.02              | 0.02              | <0.01             | <0.01             | <0.01             | <0.01             | 0.01              | <0.01             | <0.01             | <0.01             | <0.01             | 0.04              | <0.01             | 0.03              |
| 0.02              | <0.01             | 0.03              | 0.02              | 0.04              | 0.06              | 0.02              | 0.04              | 0.02              | 0.01              | 0.01              | 0.03              | 0.03              | 0.02              | 0.01              | 0.01              | 0.01              | 0.10              | 0.04              | 0.08              |
| 0.04              | 0.06              | <0.02             | 0.04              | 0.03              | 0.04              | 0.06              | 0.03              | 0.02              | <0.02             | <0.02             | <0.02             | <0.02             | <0.02             | <0.02             | <0.02             | <0.02             | <0.02             | <0.02             | <0.02             |
| <0.03             | <0.03             | <0.03             | 0.03              | <0.03             | 0.03              | 0.03              | <0.03             | <0.03             | <0.03             | <0.03             | <0.03             | <0.03             | <0.03             | <0.03             | <0.03             | <0.03             | <0.03             | <0.03             | <0.03             |
| 0.88              | 0.84              | 1.0               | 1.1               | 1.1               | 1.2               | 0.94              | 0.88              | 0.52              | 0.36              | 0.25              | 0.41              | 0.56              | 0.48              | 0.51              | 0.71              | 0.84              | 0.54              | 0.64              | 0.52              |
| <0.02             | <0.02             | <0.02             | <0.02             | <0.02             | <0.02             | <0.02             | <0.02             | <0.02             | <0.02             | <0.02             | <0.02             | <0.02             | <0.02             | <0.02             | <0.02             | <0.02             | <0.02             | <0.02             | <0.02             |
| <0.02             | <0.02             | <0.02             | <0.02             | <0.02             | <0.02             | <0.02             | <0.02             | <0.02             | <0.02             | <0.02             | <0.02             | <0.02             | <0.02             | <0.02             | <0.02             | <0.02             | <0.02             | <0.02             | <0.02             |
|                   |                   |                   |                   |                   |                   |                   |                   |                   |                   |                   |                   |                   |                   |                   |                   |                   |                   |                   |                   |

## Appendix 4: EMPA data (cont.)

| RX6727<br>Mx-f.g. | RX6727<br>Mx-f.g. | RX6727<br>Mx-f.g. | RX6727<br>Mx-f.g. | RX6727<br>Mx-f.g. | RX6713<br>CR |
|-------------------|-------------------|-------------------|-------------------|-------------------|--------------|--------------|--------------|--------------|--------------|--------------|--------------|--------------|--------------|--------------|--------------|--------------|--------------|
| 282               | 283               | 284               | 285               | 286               | 17383        | 17384        | 17385        | 17386        | 17379        | 17380        | 17382        | 17363        | 17373        | 17374        | 17375        | 17376        | 17377        |
| 0.21              | 0.44              | 0.32              | 0.34              | 0.37              | 0.32         | 0.33         | 0.21         | 0.36         | 0.34         | 0.24         | 0.62         | 0.25         | 0.34         | 0.30         | 0.27         | 0.39         | 0.30         |
| 0.01              | 0.01              | <0.008            | 0.01              | 0.009             | 0.01         | 0.01         | 0.02         | 0.03         | <0.008       | <0.008       | 0.23         | 0.02         | 0.05         | <0.008       | 0.01         | <0.008       | <0.008       |
| <0.02             | 0.15              | <0.02             | <0.02             | <0.03             | <0.03        | <0.03        | <0.03        | <0.02        | 0.08         | <0.03        | 0.05         | 0.04         | <0.02        | <0.03        | <0.02        | <0.03        | <0.02        |
| 19.3              | 20.8              | 19.6              | 21.3              | 20.5              | 18.0         | 18.7         | 18.8         | 18.4         | 18.0         | 21.5         | 18.0         | 16.7         | 18.7         | 19.8         | 20.5         | 19.8         | 19.3         |
| 31.9              | 31.5              | 32.3              | 33.8              | 33.4              | 33.6         | 33.9         | 33.9         | 34.0         | 33.7         | 33.9         | 28.2         | 33.7         | 34.1         | 35.0         | 36.0         | 35.2         | 34.7         |
| 7.4               | 7.1               | 7.3               | 7.3               | 7.8               | 7.5          | 7.5          | 7.2          | 7.0          | 7.1          | 7.4          | 6.8          | 7.4          | 7.2          | 7.5          | 7.3          | 7.2          | 7.4          |
| 0.35              | 0.52              | 1.2               | 0.35              | 0.35              | 0.26         | 0.37         | 0.41         | 0.64         | <0.04        | 0.07         | 1.1          | 1.7          | 0.18         | 0.17         | 0.48         | 0.29         | 0.59         |
| <0.09             | <0.09             | <0.09             | <0.09             | <0.09             | <0.09        | <0.09        | <0.09        | <0.09        | <0.09        | <0.09        | <0.09        | <0.10        | <0.09        | <0.09        | <0.09        | <0.09        | <0.10        |
| 0.06              | <0.05             | <0.05             | <0.05             | <0.05             | 0.20         | 0.25         | 0.25         | 0.35         | <0.05        | <0.05        | <0.05        | <0.05        | <0.05        | <0.05        | 0.06         | <0.05        | <0.05        |
| <0.05             | <0.05             | <0.05             | <0.05             | <0.05             | <0.05        | <0.05        | <0.05        | <0.05        | <0.05        | <0.05        | <0.05        | <0.05        | <0.05        | <0.05        | <0.05        | <0.05        | <0.05        |
| 0.05              | <0.05             | 0.06              | <0.05             | 0.08              | <0.05        | 0.06         | <0.05        | 0.08         | 0.07         | 0.09         | <0.05        | 0.09         | <0.05        | <0.05        | 0.06         | <0.05        | <0.05        |
| 0.32              | 0.28              | 0.24              | 0.27              | 0.32              | 0.73         | 0.64         | 0.64         | 0.54         | 0.50         | 0.56         | 0.35         | 0.83         | 0.66         | 0.51         | 0.66         | 0.43         | 0.47         |
| 0.15              | 0.17              | 0.12              | 0.13              | 0.16              | 0.31         | 0.26         | 0.26         | 0.35         | 0.22         | 0.25         | 0.13         | 0.36         | 0.21         | 0.19         | 0.27         | 0.18         | 0.17         |
| 0.05              | 0.06              | 0.06              | 0.06              | 0.06              | 0.12         | 0.10         | 0.10         | 0.12         | 0.10         | 0.07         | <0.04        | 0.13         | 0.12         | 0.12         | 0.10         | 0.08         | 0.08         |
| 0.62              | 0.53              | 0.59              | 0.59              | 0.61              | 1.2          | 1.1          | 1.0          | 0.92         | 0.90         | 0.80         | 0.63         | 1.3          | 1.2          | 0.93         | 1.0          | 0.85         | 0.92         |
| 0.38              | 0.30              | 0.31              | 0.33              | 0.32              | 0.64         | 0.56         | 0.53         | 0.53         | 0.48         | 0.56         | 0.42         | 0.66         | 0.62         | 0.56         | 0.57         | 0.47         | 0.50         |
| 7.6               | 7.1               | 7.3               | 7.4               | 7.4               | 10.3         | 10.2         | 10.1         | 8.3          | 8.5          | 8.0          | 6.6          | 10.6         | 9.9          | 9.1          | 9.3          | 8.9          | 9.0          |
| 2.8               | 2.6               | 2.8               | 2.9               | 2.8               | 3.3          | 3.3          | 3.3          | 3.2          | 3.2          | 2.8          | 2.4          | 3.5          | 3.2          | 3.2          | 3.3          | 3.3          | 3.2          |
| <0.03             | <0.03             | <0.03             | <0.03             | <0.03             | <0.03        | <0.03        | <0.03        | <0.03        | <0.03        | <0.03        | <0.03        | <0.03        | <0.03        | <0.03        | <0.03        | <0.03        | <0.03        |
| <0.01             | <0.01             | <0.01             | <0.01             | <0.01             | <0.01        | <0.01        | <0.01        | <0.01        | <0.01        | <0.01        | <0.01        | <0.01        | <0.01        | <0.01        | <0.01        | <0.01        | <0.01        |
| 0.04              | <0.01             | <0.01             | <0.01             | 0.09              | <0.01        | <0.01        | <0.01        | 0.02         | <0.01        | 0.03         | 1.7          | <0.01        | <0.01        | <0.01        | <0.01        | <0.01        | <0.01        |
| 0.07              | 0.06              | 0.08              | 0.08              | 0.08              | 0.04         | 0.05         | 0.04         | 0.04         | 0.07         | 0.03         | 0.06         | 0.08         | 0.03         | 0.04         | 0.05         | 0.08         | 0.07         |
| <0.02             | <0.02             | <0.02             | <0.02             | <0.02             | <0.02        | <0.02        | <0.02        | <0.02        | <0.02        | <0.02        | <0.02        | <0.02        | <0.02        | <0.02        | <0.02        | <0.02        | <0.02        |
| <0.01             | <0.01             | <0.01             | <0.01             | <0.01             | <0.01        | <0.01        | <0.01        | <0.01        | <0.01        | <0.01        | <0.01        | <0.01        | <0.01        | <0.01        | <0.01        | <0.01        | <0.01        |
| 0.05              | 0.04              | 0.01              | 0.02              | 0.02              | <0.01        | <0.01        | <0.01        | <0.01        | <0.01        | <0.01        | 0.02         | 1.1          | <0.01        | <0.01        | 0.01         | 0.02         | 0.01         |
| 0.04              | 0.04              | 0.05              | 0.05              | 0.05              | <0.01        | 0.03         | 0.04         | 0.05         | <0.01        | 0.02         | 0.05         | 0.03         | 0.02         | 0.03         | 0.03         | 0.03         | 0.01         |
| <0.02             | <0.02             | <0.02             | <0.02             | <0.02             | 0.26         | 0.28         | 0.22         | <0.02        | <0.02        | <0.02        | 0.13         | 0.22         | 0.08         | <0.02        | <0.02        | <0.02        | <0.02        |
| <0.03             | <0.03             | <0.03             | <0.03             | <0.03             | <0.03        | <0.03        | <0.03        | <0.03        | <0.03        | <0.03        | <0.02        | <0.03        | <0.03        | <0.03        | <0.03        | <0.03        | <0.03        |
| 0.54              | 0.56              | 0.52              | 0.50              | 0.59              | 1.1          | 1.1          | 1.0          | 1.3          | 1.0          | 0.91         | 0.54         | 1.3          | 0.61         | 0.77         | 0.70         | 0.70         | 0.62         |
| <0.02             | <0.02             | <0.02             | <0.02             | <0.02             | <0.02        | <0.02        | <0.02        | <0.02        | <0.02        | <0.02        | <0.02        | <0.02        | <0.02        | <0.02        | <0.02        | <0.02        | <0.02        |
| <0.02             | <0.02             | <0.02             | <0.02             | <0.02             | <0.02        | <0.02        | <0.02        | <0.02        | <0.02        | <0.02        | <0.02        | <0.02        | <0.02        | <0.02        | <0.02        | <0.02        | <0.02        |
|                   |                   |                   |                   |                   |              |              |              |              |              |              |              |              |              |              |              |              |              |

## Appendix 4: EMPA data (cont.)

| RX6713<br>CR | RX6713<br>CR | RX6713<br>CR | RX6713<br>CR | RX6714<br>CR | RX6714<br>CR | RX6714<br>CR | RX6714<br>CR | RX6714<br>CR | RX6714<br>CR | RX6717<br>CR |
|--------------|--------------|--------------|--------------|--------------|--------------|--------------|--------------|--------------|--------------|--------------|--------------|--------------|--------------|--------------|--------------|--------------|--------------|
| 17378        | 17358        | 17359        | 17360        | 17316        | 17317        | 17318        | 17319        | 17320        | 17321        | 17390        | 17391        | 17392        | 17396        | 17397        | 17398        | 572          | 573          |
| 0.08         | 0.08         | 0.36         | 0.05         | 0.26         | 0.10         | 0.33         | 0.23         | 0.15         | 0.09         | 0.39         | 0.45         | 0.50         | 0.50         | 0.36         | 0.48         | 0.31         | 0.22         |
| 0.02         | <0.008       | 0.01         | 0.01         | 0.13         | 0.03         | 0.03         | 0.02         | <0.008       | <0.008       | 0.009        | 0.01         | <0.008       | 0.02         | 0.01         | 0.07         | 0.21         | <0.008       |
| <0.02        | <0.03        | <0.03        | <0.03        | 0.13         | <0.03        | <0.03        | <0.03        | <0.02        | <0.03        | 0.03         | <0.03        | 0.03         | <0.03        | <0.03        | 0.05         | 0.09         | 0.04         |
| 20.5         | 19.5         | 20.8         | 14.0         | 17.9         | 20.4         | 20.5         | 17.0         | 27.2         | 22.4         | 23.3         | 22.6         | 23.0         | 23.3         | 22.9         | 19.0         | 18.6         | 21.4         |
| 32.7         | 36.4         | 35.8         | 33.2         | 37.6         | 36.0         | 35.0         | 40.8         | 24.7         | 34.1         | 36.9         | 36.3         | 36.8         | 35.7         | 35.8         | 31.5         | 31.2         | 34.5         |
| 7.2          | 7.3          | 7.1          | 7.5          | 7.0          | 7.4          | 7.1          | 7.3          | 7.3          | 7.3          | 7.3          | 7.3          | 6.9          | 7.2          | 7.5          | 6.2          | 7.0          | 6.5          |
| 0.86         | <0.04        | 0.10         | <0.04        | 0.36         | 0.40         | 0.13         | 0.14         | 0.79         | 0.56         | <0.04        | 0.10         | 0.12         | <0.04        | 0.05         | 0.40         | 0.28         | 0.12         |
| <0.09        | <0.10        | <0.10        | <0.09        | <0.09        | <0.10        | <0.09        | <0.09        | <0.09        | <0.09        | <0.09        | <0.09        | <0.09        | <0.10        | <0.10        | <0.09        | <0.09        | <0.10        |
| <0.05        | <0.05        | <0.05        | <0.05        | <0.05        | <0.05        | <0.05        | <0.05        | <0.05        | <0.05        | <0.05        | <0.05        | <0.05        | 0.66         | 0.99         | 1.1          | 1.1          | 1.2          |
| <0.05        | <0.05        | <0.05        | <0.05        | <0.05        | <0.05        | 0.06         | <0.05        | <0.05        | <0.05        | <0.05        | <0.05        | <0.05        | <0.05        | <0.05        | <0.05        | <0.05        | <0.05        |
| <0.05        | 0.08         | 0.07         | 0.06         | 0.08         | 0.06         | 0.07         | 0.06         | <0.05        | 0.05         | 0.06         | 0.07         | <0.05        | <0.05        | <0.05        | <0.05        | 0.07         | <0.05        |
| 0.31         | 0.54         | 0.60         | 1.8          | 0.45         | 0.47         | 0.58         | 0.55         | 0.48         | 0.39         | 0.28         | 0.28         | 0.28         | 0.11         | 0.34         | 0.29         | 0.27         | 0.35         |
| 0.15         | 0.22         | 0.27         | 0.43         | 0.20         | 0.21         | 0.24         | 0.27         | 0.18         | 0.22         | 0.17         | 0.13         | 0.13         | 0.06         | 0.16         | 0.15         | 0.16         | 0.16         |
| 0.09         | 0.08         | 0.14         | 0.15         | 0.06         | 0.10         | 0.10         | 0.12         | 0.08         | 0.10         | 0.09         | 0.06         | 0.06         | 0.05         | 0.08         | 0.05         | 0.06         | 0.06         |
| 0.74         | 0.93         | 0.95         | 2.8          | 0.76         | 0.89         | 0.94         | 0.94         | 1.2          | 0.90         | 0.53         | 0.47         | 0.48         | 0.37         | 0.51         | 0.44         | 0.46         | 0.56         |
| 0.37         | 0.55         | 0.57         | 1.4          | 0.35         | 0.39         | 0.40         | 0.41         | 0.55         | 0.36         | 0.30         | 0.30         | 0.25         | 0.18         | 0.31         | 0.26         | 0.29         | 0.33         |
| 8.5          | 9.6          | 9.0          | 15.7         | 8.7          | 9.5          | 9.7          | 9.6          | 13.5         | 9.8          | 7.3          | 7.2          | 7.0          | 6.4          | 7.3          | 6.5          | 6.0          | 7.2          |
| 3.1          | 3.3          | 3.3          | 4.1          | 2.9          | 3.4          | 3.4          | 3.3          | 4.5          | 3.5          | 3.0          | 2.9          | 2.9          | 2.8          | 2.8          | 2.5          | 2.3          | 2.7          |
| <0.03        | <0.03        | <0.03        | <0.03        | <0.03        | <0.03        | <0.03        | <0.03        | <0.03        | <0.03        | <0.03        | <0.03        | <0.03        | <0.03        | <0.03        | <0.03        | <0.03        | <0.03        |
| <0.01        | <0.01        | <0.01        | <0.01        | <0.01        | <0.01        | <0.01        | <0.01        | <0.01        | <0.01        | <0.01        | <0.01        | <0.01        | <0.01        | <0.01        | <0.01        | <0.01        | <0.01        |
| <0.01        | <0.01        | <0.01        | <0.01        | 0.07         | <0.01        | <0.01        | <0.01        | <0.01        | <0.01        | <0.01        | <0.01        | <0.01        | <0.01        | <0.01        | <0.01        | 1.5          | <0.01        |
| 0.02         | 0.02         | 0.02         | 0.04         | <0.01        | 0.03         | 0.02         | 0.02         | 0.04         | 0.02         | 0.05         | 0.07         | 0.09         | 0.06         | 0.07         | 0.07         | 0.04         | 0.04         |
| <0.02        | <0.02        | <0.02        | <0.02        | <0.02        | <0.02        | <0.02        | <0.02        | <0.02        | <0.02        | <0.02        | <0.02        | <0.02        | <0.02        | <0.02        | <0.02        | <0.02        | <0.02        |
| <0.01        | <0.01        | <0.01        | <0.01        | <0.01        | <0.01        | <0.01        | <0.01        | <0.01        | <0.01        | <0.01        | <0.01        | <0.01        | <0.01        | <0.01        | <0.01        | <0.01        | <0.01        |
| <0.01        | <0.01        | 0.03         | <0.01        | 0.02         | <0.01        | <0.01        | <0.01        | <0.01        | 0.01         | 0.03         | <0.01        | 0.03         | <0.01        | 0.02         | <0.01        | <0.01        | <0.01        |
| 0.02         | 0.02         | 0.01         | <0.01        | 0.04         | 0.04         | 0.07         | 0.05         | 0.04         | 0.05         | 0.03         | 0.04         | 0.04         | 0.04         | 0.02         | 0.04         | 0.02         | 0.02         |
| <0.02        | <0.02        | <0.02        | 0.10         | <0.02        | <0.02        | <0.02        | <0.02        | <0.02        | <0.02        | <0.02        | <0.02        | <0.02        | <0.02        | 0.16         | 0.10         | 0.18         | 0.16         |
| <0.03        | <0.03        | <0.03        | <0.03        | <0.03        | <0.03        | <0.03        | <0.03        | <0.03        | <0.03        | <0.03        | <0.03        | <0.03        | <0.03        | <0.03        | <0.03        | <0.03        | <0.03        |
| 0.58         | 0.95         | 0.94         | 0.91         | 0.60         | 0.53         | 0.57         | 0.54         | 0.44         | 0.43         | 0.58         | 0.54         | 0.56         | 0.41         | 0.90         | 0.71         | 0.67         | 0.68         |
| <0.02        | <0.02        | <0.02        | <0.02        | <0.02        | <0.02        | <0.02        | <0.02        | <0.02        | <0.02        | <0.02        | <0.02        | <0.02        | <0.02        | <0.02        | <0.02        | <0.02        | <0.02        |
| <0.02        | <0.02        | <0.02        | <0.02        | <0.02        | <0.02        | <0.02        | <0.02        | <0.02        | <0.02        | <0.02        | <0.02        | <0.02        | <0.02        | <0.02        | <0.02        | <0.02        | <0.02        |
|              |              |              |              |              |              |              |              |              |              |              |              |              |              |              |              |              |              |

## Appendix 4: EMPA data (cont.)

| RX6720<br>CR | RX6723<br>CR | RX6723<br>CR | RX6723<br>CR | RX6726<br>CR | RX6726<br>CR | RX6726<br>CR | RX6726<br>CR | RX6726<br>CR | RX6726<br>CR |
|--------------|--------------|--------------|--------------|--------------|--------------|--------------|--------------|--------------|--------------|--------------|--------------|--------------|--------------|--------------|--------------|--------------|--------------|--------------|--------------|
| 451          | 452          | 453          | 376          | 377          | 378          | 379          | 380          | 381          | 382          | 383          | 474          | 475          | 476          | 17442        | 17443        | 17444        | 17445        | 17446        | 17447        |
| 0.58         | 0.15         | 0.63         | 0.36         | 0.45         | 0.49         | 0.35         | 0.41         | 0.48         | 0.47         | 0.51         | 0.47         | 0.39         | 0.37         | 0.20         | 0.09         | 0.12         | 0.11         | 0.14         | 0.22         |
| 0.009        | <0.008       | <0.008       | 0.01         | <0.008       | 0.01         | 0.22         | <0.008       | <0.008       | 0.009        | <0.008       | 0.01         | <0.008       | <0.008       | 0.02         | <0.008       | <0.008       | 0.01         | <0.008       | 0.009        |
| <0.03        | <0.02        | <0.03        | <0.02        | <0.02        | <0.03        | 0.24         | <0.02        | <0.02        | <0.03        | <0.02        | <0.03        | <0.03        | <0.03        | <0.02        | 0.12         | <0.03        | 0.02         | <0.03        | <0.02        |
| 21.3         | 18.0         | 21.1         | 19.7         | 20.6         | 19.4         | 14.9         | 21.1         | 21.8         | 19.6         | 18.4         | 17.1         | 17.0         | 18.8         | 21.8         | 20.4         | 22.6         | 21.8         | 21.7         | 22.3         |
| 32.5         | 30.8         | 32.2         | 32.6         | 31.2         | 31.0         | 27.3         | 33.3         | 32.4         | 33.4         | 31.8         | 33.1         | 33.3         | 33.8         | 34.3         | 34.7         | 35.8         | 33.7         | 34.8         | 35.3         |
| 7.1          | 7.1          | 7.1          | 7.2          | 6.7          | 7.2          | 6.7          | 7.0          | 7.1          | 7.2          | 7.0          | 7.0          | 7.3          | 7.4          | 7.2          | 7.4          | 7.2          | 7.3          | 7.4          | 7.4          |
| 0.31         | 0.22         | 0.44         | 0.05         | 5.7          | 1.8          | 2.1          | 0.33         | 0.77         | 0.17         | 0.51         | 0.24         | 0.06         | 0.09         | 0.04         | <0.04        | <0.04        | 0.14         | 0.09         | 0.09         |
| <0.09        | <0.09        | <0.09        | <0.09        | <0.09        | <0.09        | <0.09        | <0.09        | <0.09        | <0.09        | <0.09        | <0.09        | <0.09        | <0.09        | <0.09        | <0.09        | <0.09        | <0.09        | <0.09        | <0.09        |
| <0.05        | <0.05        | <0.05        | <0.05        | <0.05        | <0.05        | <0.05        | <0.05        | <0.05        | <0.05        | <0.05        | <0.05        | <0.05        | <0.05        | <0.05        | 0.08         | <0.05        | <0.05        | <0.05        | <0.05        |
| <0.05        | <0.05        | <0.05        | <0.05        | <0.05        | <0.05        | <0.05        | <0.05        | <0.05        | <0.05        | <0.05        | 0.05         | <0.05        | <0.05        | <0.05        | <0.05        | <0.05        | <0.05        | <0.05        | <0.05        |
| <0.05        | <0.05        | <0.05        | 0.06         | <0.05        | <0.05        | <0.05        | 0.06         | <0.05        | 0.08         | <0.05        | 0.06         | 0.12         | 0.07         | <0.05        | 0.18         | 0.09         | 0.06         | 0.05         | <0.05        |
| 0.32         | 0.49         | 0.34         | 0.49         | 0.32         | 0.40         | 0.41         | 0.29         | 0.27         | 0.54         | 0.46         | 0.49         | 0.67         | 0.47         | 0.13         | 0.40         | 0.24         | 0.31         | 0.23         | 0.09         |
| 0.12         | 0.10         | 0.13         | 0.14         | 0.14         | 0.14         | 0.13         | 0.11         | 0.12         | 0.14         | 0.15         | 0.11         | 0.27         | 0.19         | 0.07         | 0.26         | 0.13         | 0.18         | 0.10         | 0.07         |
| 0.06         | 0.05         | 0.05         | 0.08         | 0.06         | 0.07         | 0.07         | 0.06         | 0.06         | 0.08         | 0.07         | 0.06         | 0.08         | 0.05         | 0.05         | 0.07         | 0.06         | 0.07         | 0.06         | 0.05         |
| 0.63         | 1.0          | 0.61         | 0.75         | 0.59         | 0.74         | 0.83         | 0.58         | 0.58         | 0.88         | 0.83         | 1.1          | 1.1          | 0.93         | 0.53         | 0.85         | 0.68         | 0.59         | 0.60         | 0.52         |
| 0.34         | 0.45         | 0.33         | 0.37         | 0.34         | 0.39         | 0.44         | 0.37         | 0.35         | 0.43         | 0.43         | 0.48         | 0.53         | 0.43         | 0.27         | 0.41         | 0.33         | 0.33         | 0.33         | 0.26         |
| 7.9          | 9.4          | 7.8          | 8.8          | 7.6          | 8.6          | 8.8          | 7.9          | 7.7          | 9.3          | 9.2          | 11.0         | 10.2         | 9.5          | 7.8          | 8.6          | 8.2          | 7.1          | 8.2          | 7.9          |
| 2.7          | 3.1          | 2.8          | 3.1          | 2.7          | 2.9          | 2.8          | 2.8          | 2.6          | 3.1          | 3.0          | 3.5          | 3.3          | 3.1          | 2.9          | 3.1          | 3.0          | 2.7          | 3.0          | 3.0          |
| <0.03        | <0.03        | <0.03        | <0.03        | <0.03        | <0.03        | <0.03        | <0.03        | <0.03        | <0.03        | <0.03        | <0.03        | <0.03        | <0.03        | <0.03        | <0.03        | <0.03        | <0.03        | <0.03        | <0.03        |
| <0.01        | <0.01        | <0.01        | <0.01        | <0.01        | <0.01        | <0.01        | <0.01        | <0.01        | <0.01        | <0.01        | <0.01        | <0.01        | <0.01        | <0.01        | <0.01        | <0.01        | <0.01        | <0.01        | <0.01        |
| <0.01        | <0.01        | <0.01        | <0.01        | 0.07         | 0.02         | 0.48         | <0.01        | <0.01        | <0.01        | <0.01        | 0.05         | <0.01        | <0.01        | 0.02         | <0.01        | <0.01        | <0.01        | <0.01        | <0.01        |
| 0.06         | 0.07         | 0.08         | 0.06         | 0.07         | 0.08         | 0.04         | 0.06         | 0.05         | 0.07         | 0.08         | 0.12         | 0.11         | 0.11         | 0.07         | 0.05         | 0.03         | 0.06         | 0.07         | 0.05         |
| <0.02        | <0.02        | <0.02        | <0.02        | <0.02        | <0.02        | <0.02        | <0.02        | <0.02        | <0.02        | <0.02        | <0.02        | <0.02        | <0.02        | <0.02        | <0.02        | <0.02        | <0.02        | <0.02        | <0.02        |
| <0.01        | <0.01        | <0.01        | <0.01        | <0.01        | <0.01        | <0.01        | <0.01        | <0.01        | <0.01        | <0.01        | <0.01        | <0.01        | <0.01        | <0.01        | <0.01        | <0.01        | <0.01        | <0.01        | <0.01        |
| 0.03         | <0.01        | 0.02         | <0.01        | <0.01        | 0.02         | 0.02         | <0.01        | 0.02         | 0.02         | 0.02         | 0.03         | <0.01        | 0.01         | <0.01        | <0.01        | <0.01        | <0.01        | <0.01        | <0.01        |
| 0.04         | 0.02         | 0.05         | 0.03         | 0.03         | 0.04         | 0.04         | 0.10         | 0.02         | 0.05         | 0.04         | 0.03         | 0.02         | 0.02         | 0.01         | 0.01         | <0.01        | 0.02         | <0.01        | <0.01        |
| 0.34         | 0.97         | 0.35         | 0.41         | 0.30         | 0.35         | 0.31         | 0.29         | 0.31         | 0.36         | 0.40         | 0.48         | 0.35         | 0.29         | <0.02        | <0.02        | <0.02        | 0.06         | <0.02        | <0.02        |
| <0.03        | 0.04         | <0.03        | <0.03        | <0.03        | <0.03        | <0.02        | <0.03        | <0.03        | <0.03        | <0.03        | <0.03        | <0.03        | <0.03        | <0.03        | <0.03        | <0.03        | <0.03        | <0.03        | <0.03        |
| 0.56         | 0.36         | 0.60         | 0.60         | 0.58         | 0.62         | 0.48         | 0.52         | 0.53         | 0.70         | 0.64         | 0.53         | 0.72         | 0.62         | 0.25         | 0.91         | 0.51         | 0.60         | 0.35         | 0.19         |
| <0.02        | <0.02        | <0.02        | <0.02        | <0.02        | <0.02        | <0.02        | <0.02        | <0.02        | <0.02        | <0.02        | <0.02        | <0.02        | <0.02        | <0.02        | <0.02        | <0.02        | <0.02        | <0.02        | <0.02        |
| <0.02        | <0.02        | <0.02        | <0.02        | <0.02        | <0.02        | <0.02        | <0.02        | <0.02        | <0.02        | <0.02        | <0.02        | <0.02        | <0.02        | <0.02        | <0.02        | <0.02        | <0.02        | <0.02        | <0.02        |
|              |              |              |              |              |              |              |              |              |              |              |              |              |              |              |              |              |              |              |              |

## Appendix 4: EMPA data (cont.)

| RX6726<br>CR | RX6727<br>CR |
|--------------|--------------|--------------|--------------|--------------|--------------|--------------|--------------|--------------|--------------|--------------|--------------|--------------|--------------|--------------|--------------|--------------|--------------|
| 17448        | 17449        | 17450        | 17451        | 17452        | 17453        | 17454        | 17455        | 17456        | 17457        | 17458        | 17459        | 17460        | 17461        | 17462        | 17464        | 17465        | 241          |
| 0.15         | 0.11         | 0.06         | 0.06         | 0.11         | 0.22         | 0.16         | 0.12         | 0.11         | 0.09         | 0.06         | 0.08         | 0.18         | 0.13         | 0.09         | 0.03         | 0.14         | 0.37         |
| <0.008       | <0.008       | 0.02         | 0.01         | <0.008       | <0.008       | <0.008       | <0.008       | 0.02         | 0.02         | 0.008        | <0.008       | <0.008       | 0.01         | <0.008       | 0.02         | <0.008       | 0.02         |
| <0.03        | 0.04         | <0.03        | <0.03        | <0.03        | <0.03        | 0.06         | <0.02        | <0.02        | <0.02        | 0.09         | 0.12         | <0.02        | 0.05         | <0.02        | <0.02        | <0.02        | <0.03        |
| 21.0         | 19.9         | 22.3         | 22.6         | 21.3         | 21.6         | 20.7         | 21.8         | 19.5         | 21.6         | 20.3         | 19.9         | 20.1         | 20.5         | 16.0         | 22.4         | 20.4         | 19.9         |
| 34.9         | 34.4         | 35.7         | 36.1         | 35.3         | 35.0         | 35.7         | 34.4         | 33.7         | 34.1         | 34.0         | 33.8         | 36.3         | 33.9         | 35.0         | 35.9         | 33.2         | 34.5         |
| 7.4          | 7.5          | 7.5          | 7.3          | 7.3          | 7.5          | 7.3          | 7.3          | 7.2          | 7.1          | 7.3          | 7.3          | 7.5          | 7.4          | 7.3          | 7.3          | 7.3          | 7.4          |
| 0.04         | <0.04        | <0.04        | <0.04        | <0.04        | <0.04        | <0.04        | <0.04        | 0.06         | 0.08         | <0.04        | <0.04        | <0.04        | 0.06         | <0.04        | 0.15         | 0.06         | 0.60         |
| <0.09        | <0.09        | <0.09        | <0.09        | <0.09        | <0.09        | <0.09        | <0.09        | <0.09        | <0.09        | <0.09        | <0.09        | <0.09        | <0.09        | <0.09        | <0.09        | <0.09        | <0.09        |
| <0.05        | <0.05        | <0.05        | <0.05        | <0.05        | <0.05        | <0.05        | <0.05        | <0.05        | <0.05        | <0.05        | <0.05        | <0.05        | <0.05        | <0.05        | 0.05         | <0.05        | <0.05        |
| <0.05        | <0.05        | <0.05        | <0.05        | <0.05        | <0.05        | <0.05        | <0.05        | <0.05        | <0.05        | <0.05        | <0.05        | <0.05        | <0.05        | <0.05        | <0.05        | <0.05        | <0.05        |
| 0.07         | 0.09         | 0.06         | 0.08         | 0.06         | <0.05        | 0.07         | 0.08         | 0.09         | <0.05        | 0.10         | 0.07         | 0.08         | <0.05        | <0.05        | 0.12         | 0.07         | 0.09         |
| 0.30         | 0.45         | 0.24         | 0.26         | 0.27         | 0.26         | 0.36         | 0.25         | 0.40         | 0.21         | 0.37         | 0.38         | 0.38         | 0.23         | 0.46         | 0.34         | 0.20         | 0.38         |
| 0.19         | 0.24         | 0.11         | 0.11         | 0.11         | 0.09         | 0.21         | 0.14         | 0.23         | 0.09         | 0.17         | 0.21         | 0.14         | 0.13         | 0.11         | 0.22         | 0.14         | 0.20         |
| 0.05         | 0.08         | 0.06         | 0.08         | 0.05         | <0.05        | 0.09         | 0.06         | 0.10         | 0.05         | 0.07         | 0.09         | 0.08         | 0.05         | 0.07         | 0.10         | 0.08         | 0.07         |
| 0.75         | 0.87         | 0.70         | 0.62         | 0.65         | 0.62         | 0.86         | 0.64         | 0.90         | 0.51         | 0.77         | 0.82         | 0.88         | 0.67         | 1.0          | 0.76         | 0.65         | 0.64         |
| 0.37         | 0.43         | 0.37         | 0.32         | 0.31         | 0.35         | 0.44         | 0.29         | 0.44         | 0.28         | 0.35         | 0.42         | 0.42         | 0.33         | 0.46         | 0.40         | 0.32         | 0.40         |
| 8.3          | 8.8          | 8.2          | 8.1          | 8.2          | 8.2          | 9.0          | 8.0          | 8.9          | 7.5          | 8.3          | 8.6          | 9.1          | 8.3          | 9.7          | 8.3          | 8.2          | 7.9          |
| 2.9          | 3.1          | 3.0          | 3.0          | 3.0          | 3.0          | 3.1          | 3.0          | 3.1          | 2.8          | 3.0          | 3.2          | 3.2          | 3.1          | 3.4          | 3.1          | 3.0          | 2.9          |
| <0.03        | <0.03        | <0.03        | <0.03        | <0.03        | <0.03        | <0.03        | <0.03        | <0.03        | <0.03        | <0.03        | <0.03        | <0.03        | <0.03        | <0.03        | <0.03        | <0.03        | <0.03        |
| <0.01        | <0.01        | <0.01        | <0.01        | <0.01        | <0.01        | <0.01        | <0.01        | <0.01        | <0.01        | <0.01        | <0.01        | <0.01        | <0.01        | <0.01        | <0.01        | <0.01        | <0.01        |
| <0.01        | <0.01        | 0.02         | <0.01        | <0.01        | <0.01        | <0.01        | <0.01        | 0.02         | <0.01        | <0.01        | <0.01        | <0.01        | <0.01        | <0.01        | <0.01        | <0.01        | 0.02         |
| 0.05         | 0.03         | 0.04         | 0.03         | 0.04         | 0.07         | 0.02         | 0.04         | 0.04         | 0.07         | 0.04         | 0.04         | 0.02         | 0.05         | 0.02         | 0.04         | 0.05         | 0.08         |
| <0.02        | <0.02        | <0.02        | <0.02        | <0.02        | <0.02        | <0.02        | <0.02        | <0.02        | <0.02        | <0.02        | <0.02        | <0.02        | <0.02        | <0.02        | <0.02        | <0.02        | <0.02        |
| <0.01        | <0.01        | <0.01        | <0.01        | <0.01        | <0.01        | <0.01        | <0.01        | <0.01        | <0.01        | <0.01        | <0.01        | <0.01        | <0.01        | <0.01        | <0.01        | <0.01        | <0.01        |
| <0.01        | <0.01        | <0.01        | <0.01        | <0.01        | <0.01        | <0.01        | <0.01        | <0.01        | <0.01        | <0.01        | <0.01        | <0.01        | <0.01        | 0.01         | <0.01        | <0.01        | <0.01        |
| 0.03         | 0.03         | 0.02         | 0.02         | 0.04         | 0.02         | 0.01         | <0.01        | <0.01        | 0.02         | 0.02         | <0.01        | <0.01        | <0.01        | 0.02         | <0.01        | <0.01        | 0.03         |
| <0.02        | <0.02        | <0.02        | <0.02        | <0.02        | <0.02        | <0.02        | <0.02        | <0.02        | <0.02        | <0.02        | 0.03         | 0.03         | 0.03         | <0.02        | <0.02        | <0.02        | 0.06         |
| <0.03        | <0.03        | <0.03        | <0.03        | <0.03        | <0.03        | <0.03        | <0.03        | <0.03        | <0.02        | <0.03        | <0.03        | <0.03        | <0.03        | <0.03        | <0.03        | <0.03        | <0.03        |
| 0.57         | 0.86         | 0.36         | 0.45         | 0.37         | 0.26         | 0.57         | 0.62         | 0.74         | 0.21         | 0.62         | 0.59         | 0.31         | 0.37         | 0.17         | 0.70         | 0.66         | 0.70         |
| <0.02        | <0.02        | <0.02        | <0.02        | <0.02        | <0.02        | <0.02        | <0.02        | <0.02        | <0.02        | <0.02        | <0.02        | <0.02        | <0.02        | <0.02        | <0.02        | <0.02        | <0.02        |
| <0.02        | <0.02        | <0.02        | <0.02        | <0.02        | <0.02        | <0.02        | <0.02        | <0.02        | <0.02        | <0.02        | <0.02        | <0.02        | <0.02        | <0.02        | <0.02        | <0.02        | <0.02        |
|              |              |              |              |              |              |              |              |              |              |              |              |              |              |              |              |              |              |

Appendix 4: EMPA data (cont.)

| RX6727<br>CR | RX6727<br>CR | RX6727<br>CR | RX6728<br>CR | RX6728<br>CR | RX6728<br>CR | RX6728<br>CR | RX6728<br>CR | RX6720<br>Irr. |
|--------------|--------------|--------------|--------------|--------------|--------------|--------------|--------------|----------------|----------------|----------------|----------------|----------------|----------------|----------------|----------------|----------------|----------------|----------------|----------------|----------------|
| 242          | 239          | 240          | 262          | 263          | 265          | 266          | 267          | 374            | 375            | 436            | 437            | 438            | 439            | 440            | 441            | 442            | 443            | 444            | 445            | 390            |
| 0.28         | 0.37         | 0.28         | 0.02         | 0.01         | 0.03         | <0.008       | 0.04         | 0.18           | 0.23           | 0.25           | 0.53           | 0.08           | 0.34           | 0.28           | 0.69           | 0.29           | 0.28           | 0.62           | 0.50           | 0.26           |
| 0.02         | 0.03         | 0.01         | 0.01         | <0.008       | <0.008       | 0.01         | 0.02         | 0.02           | <0.008         | <0.008         | 0.01           | <0.008         | <0.008         | <0.008         | <0.008         | <0.008         | <0.008         | <0.008         | <0.008         | <0.008         |
| <0.03        | 0.04         | <0.02        | <0.02        | <0.02        | <0.02        | <0.02        | <0.02        | 0.19           | 0.27           | 0.22           | 0.23           | 0.10           | 0.13           | 0.23           | 0.37           | 0.16           | 0.31           | 0.18           | 0.27           | 0.23           |
| 20.5         | 20.5         | 19.7         | 18.1         | 15.4         | 17.1         | 16.0         | 15.0         | 19.1           | 22.4           | 22.0           | 23.3           | 21.6           | 22.9           | 21.5           | 20.8           | 21.7           | 23.1           | 22.5           | 20.2           | 24.2           |
| 32.8         | 33.0         | 34.6         | 34.6         | 33.2         | 33.9         | 33.2         | 31.7         | 29.8           | 30.9           | 31.7           | 31.7           | 31.7           | 31.5           | 33.1           | 29.3           | 30.9           | 31.0           | 30.7           | 31.7           | 32.4           |
| 7.5          | 7.5          | 7.3          | 7.2          | 7.3          | 7.4          | 7.2          | 7.3          | 7.4            | 7.1            | 7.2            | 7.1            | 7.1            | 7.0            | 7.0            | 7.1            | 7.1            | 7.0            | 7.1            | 6.9            | 7.0            |
| 0.47         | 0.25         | 0.10         | 0.18         | <0.04        | 0.15         | 0.16         | 0.19         | 0.13           | 0.17           | 0.19           | 0.28           | <0.04          | 0.19           | 0.24           | 0.06           | 0.15           | 0.07           | 0.12           | 0.26           | <0.04          |
| <0.09        | <0.09        | <0.09        | <0.09        | <0.09        | <0.09        | <0.09        | <0.09        | <0.09          | <0.09          | <0.09          | <0.09          | <0.09          | <0.09          | <0.09          | <0.09          | <0.09          | <0.09          | <0.09          | <0.09          | <0.09          |
| <0.05        | <0.05        | <0.05        | <0.05        | <0.05        | <0.05        | <0.05        | 0.07         | <0.05          | <0.05          | <0.05          | <0.05          | <0.05          | <0.05          | <0.05          | 0.09           | <0.05          | 0.05           | <0.05          | <0.05          | <0.05          |
| <0.05        | <0.05        | <0.05        | <0.05        | <0.05        | <0.05        | <0.05        | <0.05        | <0.05          | <0.05          | <0.05          | <0.05          | <0.05          | <0.05          | <0.05          | <0.05          | <0.05          | <0.05          | <0.05          | <0.05          | <0.05          |
| 0.09         | 0.07         | 0.07         | <0.05        | <0.05        | <0.05        | <0.05        | 0.19         | 0.08           | <0.05          | 0.07           | 0.09           | 0.07           | 0.08           | 0.07           | 0.12           | <0.05          | 0.10           | <0.05          | 0.08           | 0.08           |
| 0.39         | 0.30         | 0.43         | 0.17         | 0.31         | 0.20         | 0.41         | 0.96         | 0.31           | 0.25           | 0.26           | 0.23           | 0.32           | 0.21           | 0.34           | 0.32           | 0.23           | 0.26           | 0.15           | 0.39           | 0.21           |
| 0.19         | 0.13         | 0.22         | <0.05        | 0.09         | <0.05        | 0.12         | 0.50         | 0.12           | 0.12           | 0.10           | 0.09           | 0.14           | 0.06           | 0.17           | 0.20           | 0.09           | 0.12           | 0.05           | 0.17           | 0.08           |
| 0.07         | 0.05         | 0.07         | 0.05         | <0.05        | <0.05        | <0.05        | 0.11         | 0.05           | <0.04          | <0.05          | 0.07           | <0.05          | <0.05          | <0.05          | 0.06           | <0.05          | 0.06           | <0.04          | <0.05          | <0.05          |
| 0.61         | 0.58         | 0.71         | 0.61         | 1.0          | 0.67         | 1.1          | 1.3          | 0.63           | 0.46           | 0.46           | 0.42           | 0.64           | 0.40           | 0.61           | 0.53           | 0.50           | 0.40           | 0.35           | 0.61           | 0.41           |
| 0.33         | 0.32         | 0.39         | 0.29         | 0.50         | 0.33         | 0.50         | 0.65         | 0.31           | 0.21           | 0.23           | 0.20           | 0.32           | 0.19           | 0.32           | 0.25           | 0.21           | 0.17           | 0.14           | 0.30           | 0.18           |
| 7.6          | 7.3          | 8.4          | 9.4          | 11.2         | 10.3         | 11.9         | 12.2         | 7.8            | 6.8            | 7.1            | 7.0            | 7.9            | 7.1            | 7.8            | 7.2            | 7.4            | 6.8            | 6.6            | 8.1            | 6.8            |
| 2.8          | 2.7          | 3.1          | 3.4          | 3.6          | 3.5          | 3.7          | 3.8          | 2.7            | 2.6            | 2.6            | 2.5            | 2.8            | 2.5            | 2.9            | 2.5            | 2.7            | 2.5            | 2.4            | 3.0            | 2.5            |
| <0.03        | <0.03        | <0.03        | <0.03        | <0.03        | <0.03        | <0.03        | <0.03        | <0.03          | <0.03          | <0.03          | <0.03          | <0.03          | <0.03          | <0.03          | <0.03          | <0.03          | <0.03          | <0.03          | <0.03          | <0.03          |
| <0.01        | <0.01        | <0.01        | <0.01        | <0.01        | <0.01        | <0.01        | <0.01        | <0.01          | <0.01          | <0.01          | <0.01          | <0.01          | <0.01          | <0.01          | <0.01          | <0.01          | <0.01          | <0.01          | <0.01          | <0.01          |
| <0.01        | <0.01        | <0.01        | <0.01        | <0.01        | <0.01        | <0.01        | <0.01        | <0.01          | <0.01          | <0.01          | 0.01           | <0.01          | <0.01          | <0.01          | 0.02           | <0.01          | <0.01          | <0.01          | <0.01          | <0.01          |
| 0.06         | 0.08         | 0.05         | 0.03         | 0.02         | 0.03         | <0.01        | 0.03         | 0.04           | 0.06           | 0.07           | 0.06           | 0.03           | 0.05           | 0.03           | 0.07           | 0.03           | 0.04           | 0.06           | 0.07           | 0.05           |
| <0.02        | <0.02        | <0.02        | <0.02        | <0.02        | <0.02        | <0.02        | <0.02        | <0.02          | <0.02          | <0.02          | <0.02          | <0.02          | <0.02          | <0.02          | <0.02          | <0.02          | <0.02          | <0.02          | <0.02          | <0.02          |
| <0.01        | <0.01        | <0.01        | <0.01        | <0.01        | <0.01        | <0.01        | <0.01        | <0.01          | <0.01          | <0.01          | <0.01          | <0.01          | <0.01          | <0.01          | <0.01          | <0.01          | <0.01          | <0.01          | <0.01          | <0.01          |
| 0.05         | 0.05         | 0.01         | 0.09         | 0.02         | 0.04         | 0.02         | 0.02         | <0.01          | <0.01          | <0.01          | <0.01          | <0.01          | <0.01          | <0.01          | 0.03           | <0.01          | 0.02           | 0.03           | 0.03           | <0.01          |
| 0.04         | 0.07         | 0.03         | 0.04         | 0.01         | 0.02         | 0.02         | <0.01        | 0.02           | 0.02           | 0.03           | 0.04           | 0.03           | 0.03           | 0.03           | 0.02           | 0.04           | 0.05           | 0.04           | 0.02           | 0.04           |
| 0.03         | <0.02        | <0.02        | <0.02        | <0.02        | <0.02        | <0.02        | 0.04         | <0.02          | <0.02          | <0.02          | <0.02          | <0.02          | <0.02          | <0.02          | <0.02          | <0.02          | <0.02          | <0.02          | <0.02          | <0.02          |
| <0.03        | <0.03        | <0.03        | <0.03        | <0.03        | <0.03        | <0.03        | <0.03        | <0.03          | 0.06           | 0.03           | <0.03          | <0.03          | <0.03          | <0.03          | 0.10           | <0.03          | 0.07           | <0.03          | 0.06           | <0.03          |
| 0.79         | 0.54         | 0.78         | 0.07         | 0.23         | 0.22         | 0.34         | 1.7          | 0.62           | 0.51           | 0.54           | 0.49           | 0.57           | 0.52           | 0.65           | 0.96           | 0.62           | 0.70           | 0.51           | 0.65           | 0.49           |
| <0.02        | <0.02        | <0.02        | <0.02        | <0.02        | <0.02        | <0.02        | <0.02        | <0.02          | <0.02          | <0.02          | <0.02          | <0.02          | <0.02          | <0.02          | <0.02          | <0.02          | <0.02          | <0.02          | <0.02          | <0.02          |
| <0.02        | <0.02        | <0.02        | <0.02        | <0.02        | <0.02        | <0.02        | <0.02        | <0.02          | <0.02          | <0.02          | <0.02          | <0.02          | <0.02          | <0.02          | <0.02          | <0.02          | <0.02          | <0.02          | <0.02          | <0.02          |
|              |              |              |              |              |              |              |              |                |                |                |                |                |                |                |                |                |                |                |                |                |

## Appendix 4: EMPA data (cont.)

| RX6720<br>Irr. |
|----------------|----------------|----------------|----------------|----------------|----------------|----------------|----------------|----------------|----------------|----------------|----------------|----------------|----------------|----------------|----------------|----------------|----------------|----------------|----------------|----------------|
| 392            | 446            | 366            | 367            | 368            | 369            | 370            | 372            | 373            | 433            | 434            | 435            | 425            | 426            | 427            | 428            | 430            | 431            | 432            | 384            | 386            |
| 0.45           | 0.36           | 0.22           | 0.11           | 0.55           | 0.14           | 0.26           | 0.22           | 0.21           | 0.43           | 0.10           | 0.20           | 0.34           | 0.15           | 0.23           | 0.42           | 0.24           | 0.33           | 0.12           | 0.27           | 0.47           |
| <0.008         | <0.008         | <0.008         | <0.008         | <0.008         | <0.008         | <0.008         | <0.008         | <0.008         | <0.008         | <0.008         | <0.008         | <0.008         | <0.008         | <0.008         | <0.008         | <0.008         | 0.01           | <0.008         | 0.02           | 0.01           |
| 0.09           | 0.16           | 0.24           | 0.06           | 0.10           | 0.24           | 0.15           | 0.18           | 0.09           | 0.12           | <0.03          | 0.22           | 0.24           | 0.03           | 0.13           | 0.16           | 0.12           | 0.18           | 0.06           | 0.47           | 0.21           |
| 21.2           | 22.6           | 19.8           | 22.5           | 23.1           | 23.4           | 21.1           | 20.8           | 21.6           | 20.5           | 23.1           | 20.2           | 22.4           | 18.6           | 21.9           | 22.0           | 20.5           | 22.5           | 18.9           | 20.4           | 23.9           |
| 31.5           | 31.7           | 30.0           | 31.4           | 31.0           | 32.1           | 33.2           | 31.9           | 31.3           | 31.4           | 32.8           | 31.7           | 30.9           | 33.2           | 32.1           | 31.9           | 32.2           | 32.6           | 31.5           | 30.3           | 31.8           |
| 7.2            | 7.1            | 7.1            | 7.1            | 7.1            | 7.1            | 6.9            | 6.9            | 7.0            | 7.1            | 7.2            | 7.2            | 7.1            | 7.1            | 7.0            | 7.1            | 7.1            | 7.0            | 7.0            | 6.8            | 7.1            |
| <0.04          | 0.25           | <0.04          | <0.04          | <0.04          | <0.04          | 0.44           | 0.06           | 0.06           | <0.04          | <0.04          | <0.04          | 0.06           | <0.04          | <0.04          | 0.07           | 0.79           | 0.80           | 0.07           | 1.9            | 4.0            |
| <0.09          | <0.09          | <0.09          | <0.09          | <0.09          | <0.09          | <0.09          | <0.09          | <0.09          | <0.10          | <0.10          | <0.10          | <0.09          | <0.09          | <0.09          | <0.09          | <0.09          | <0.09          | <0.09          | <0.09          | <0.09          |
| <0.05          | <0.05          | <0.05          | <0.05          | <0.05          | <0.05          | <0.05          | <0.05          | <0.05          | <0.05          | <0.05          | <0.05          | <0.05          | <0.05          | <0.05          | <0.05          | <0.05          | <0.05          | <0.05          | <0.05          | <0.05          |
| <0.05          | <0.05          | <0.05          | <0.05          | <0.05          | <0.05          | <0.05          | <0.05          | <0.05          | <0.05          | <0.05          | <0.05          | <0.05          | <0.05          | <0.05          | <0.05          | <0.05          | <0.05          | <0.05          | <0.05          | <0.05          |
| 0.07           | 0.05           | 0.09           | 0.08           | 0.05           | 0.09           | 0.07           | 0.08           | 0.06           | <0.05          | <0.05          | <0.05          | 0.08           | <0.05          | 0.07           | 0.07           | 0.10           | 0.07           | <0.05          | <0.05          | 0.07           |
| 0.38           | 0.24           | 0.35           | 0.28           | 0.22           | 0.24           | 0.40           | 0.42           | 0.38           | 0.33           | 0.28           | 0.35           | 0.34           | 0.58           | 0.36           | 0.36           | 0.43           | 0.35           | 0.45           | 0.23           | 0.18           |
| 0.13           | 0.10           | 0.20           | 0.13           | 0.05           | 0.12           | 0.19           | 0.24           | 0.17           | 0.10           | 0.12           | 0.15           | 0.18           | 0.15           | 0.16           | 0.12           | 0.19           | 0.18           | 0.16           | 0.12           | 0.08           |
| 0.09           | 0.05           | 0.06           | 0.05           | 0.05           | 0.06           | 0.06           | <0.05          | 0.05           | <0.05          | 0.05           | 0.06           | 0.06           | 0.05           | 0.06           | 0.09           | 0.08           | 0.06           | 0.05           | 0.05           | 0.07           |
| 0.70           | 0.51           | 0.48           | 0.50           | 0.47           | 0.49           | 0.70           | 0.71           | 0.57           | 0.63           | 0.50           | 0.65           | 0.56           | 1.0            | 0.59           | 0.64           | 0.77           | 0.60           | 0.75           | 0.53           | 0.39           |
| 0.29           | 0.23           | 0.22           | 0.24           | 0.20           | 0.21           | 0.35           | 0.33           | 0.25           | 0.26           | 0.27           | 0.38           | 0.26           | 0.48           | 0.26           | 0.33           | 0.40           | 0.36           | 0.36           | 0.27           | 0.18           |
| 7.9            | 7.2            | 6.9            | 7.1            | 6.8            | 7.0            | 8.4            | 8.1            | 7.5            | 8.2            | 7.3            | 7.9            | 7.3            | 10.2           | 7.6            | 8.0            | 8.4            | 7.6            | 8.5            | 6.7            | 6.9            |
| 2.8            | 2.6            | 2.5            | 2.6            | 2.5            | 2.6            | 3.0            | 2.9            | 2.7            | 2.9            | 2.6            | 2.7            | 2.6            | 3.3            | 2.7            | 2.8            | 2.9            | 2.6            | 2.9            | 2.4            | 2.5            |
| <0.03          | <0.03          | <0.03          | <0.03          | <0.03          | <0.03          | <0.03          | <0.03          | <0.03          | <0.03          | <0.03          | <0.03          | <0.03          | <0.03          | <0.03          | <0.03          | <0.03          | <0.03          | <0.03          | <0.03          | <0.03          |
| <0.01          | <0.01          | <0.01          | <0.01          | <0.01          | <0.01          | <0.01          | <0.01          | <0.01          | <0.01          | <0.01          | <0.01          | <0.01          | <0.01          | <0.01          | <0.01          | <0.01          | <0.01          | <0.01          | <0.01          | <0.01          |
| <0.01          | <0.01          | <0.01          | <0.01          | <0.01          | <0.01          | <0.01          | <0.01          | <0.01          | <0.01          | <0.01          | <0.01          | <0.01          | <0.01          | <0.01          | <0.01          | <0.01          | <0.01          | <0.01          | 0.06           | 0.08           |
| 0.03           | 0.04           | 0.05           | 0.03           | 0.05           | 0.02           | 0.04           | 0.05           | 0.05           | 0.05           | 0.04           | 0.07           | 0.04           | 0.04           | 0.05           | 0.06           | 0.05           | 0.04           | 0.02           | 0.04           | 0.04           |
| <0.02          | <0.02          | <0.02          | <0.02          | <0.02          | <0.02          | <0.02          | <0.02          | <0.02          | <0.02          | <0.02          | <0.02          | <0.02          | <0.02          | <0.02          | <0.02          | <0.02          | <0.02          | <0.02          | <0.02          | <0.02          |
| <0.01          | <0.01          | <0.01          | <0.01          | <0.01          | <0.01          | <0.01          | <0.01          | <0.01          | <0.01          | <0.01          | <0.01          | <0.01          | <0.01          | <0.01          | <0.01          | <0.01          | <0.01          | <0.01          | <0.01          | <0.01          |
| <0.01          | 0.01           | 0.02           | <0.01          | <0.01          | <0.01          | 0.01           | <0.01          | <0.01          | 0.01           | <0.01          | <0.01          | 0.01           | <0.01          | <0.01          | 0.01           | 0.01           | 0.03           | <0.01          | <0.01          | 0.03           |
| 0.02           | 0.02           | 0.08           | 0.06           | 0.04           | 0.04           | 0.04           | 0.04           | 0.04           | 0.02           | 0.03           | 0.03           | 0.02           | 0.02           | 0.02           | 0.02           | 0.03           | 0.04           | <0.01          | 0.03           | 0.11           |
| <0.02          | <0.02          | <0.02          | <0.02          | <0.02          | <0.02          | <0.02          | <0.02          | <0.02          | <0.02          | <0.02          | <0.02          | <0.02          | <0.02          | <0.02          | <0.02          | <0.02          | <0.02          | <0.02          | <0.02          | <0.02          |
| <0.03          | <0.03          | 0.05           | <0.03          | <0.03          | 0.03           | <0.03          | 0.04           | <0.03          | <0.03          | <0.03          | 0.05           | 0.03           | <0.03          | <0.03          | <0.03          | <0.03          | <0.03          | <0.03          | 0.03           | 0.04           |
| 0.50           | 0.41           | 0.80           | 0.56           | 0.45           | 0.61           | 0.51           | 0.93           | 0.60           | 0.56           | 0.55           | 0.65           | 0.68           | 0.50           | 0.64           | 0.47           | 0.79           | 0.69           | 0.58           | 0.50           | 0.56           |
| <0.02          | <0.02          | <0.02          | <0.02          | <0.02          | <0.02          | <0.02          | <0.02          | <0.02          | <0.02          | <0.02          | <0.02          | <0.02          | <0.02          | <0.02          | <0.02          | <0.02          | <0.02          | <0.02          | 0.05           | <0.02          |
| <0.02          | <0.02          | <0.02          | <0.02          | <0.02          | <0.02          | <0.02          | <0.02          | <0.02          | <0.02          | <0.02          | <0.02          | <0.02          | <0.02          | <0.02          | <0.02          | <0.02          | <0.02          | <0.02          | <0.02          | <0.02          |
|                |                |                |                |                |                |                |                |                |                |                |                |                |                |                |                |                |                |                |                |                |

## Appendix 4: EMPA data (cont.)

| RX6720<br>Irr. | RX6721<br>Irr. |
|----------------|----------------|----------------|----------------|----------------|----------------|----------------|----------------|----------------|----------------|----------------|----------------|----------------|----------------|----------------|----------------|----------------|----------------|----------------|
| 387            | 388            | 422            | 423            | 424            | 447            | 448            | 450            | 17400          | 17401          | 17402          | 17403          | 17404          | 17405          | 17406          | 17407          | 17408          | 17409          | 17410          |
| 0.39           | 0.43           | 0.52           | 0.47           | 0.43           | 0.35           | 0.63           | 0.57           | 0.14           | 0.06           | 0.35           | 0.07           | 0.23           | 0.15           | 0.18           | 0.14           | 0.09           | 0.08           | 0.07           |
| 0.01           | 0.01           | 0.008          | 0.01           | <0.008         | <0.008         | <0.008         | 0.02           | <0.008         | 0.01           | <0.008         | <0.008         | 0.008          | <0.008         | <0.008         | <0.008         | 1.2            | <0.008         | <0.008         |
| 0.17           | 0.13           | 0.11           | 0.11           | 0.11           | 0.15           | 0.18           | 0.18           | 0.06           | 0.09           | 0.14           | 0.13           | 0.06           | 0.06           | 0.08           | 0.05           | <0.02          | 0.24           | <0.02          |
| 24.2           | 23.3           | 23.5           | 22.5           | 23.1           | 24.3           | 23.4           | 22.7           | 25.6           | 19.1           | 24.3           | 23.6           | 25.2           | 25.5           | 24.9           | 25.1           | 24.8           | 24.7           | 22.1           |
| 32.4           | 30.8           | 31.4           | 30.4           | 31.1           | 31.5           | 30.4           | 31.0           | 34.6           | 34.1           | 33.3           | 32.4           | 34.7           | 34.5           | 33.7           | 33.6           | 33.4           | 33.3           | 33.8           |
| 7.0            | 7.1            | 7.2            | 7.1            | 7.0            | 7.1            | 6.6            | 7.2            | 7.0            | 7.4            | 7.1            | 7.2            | 7.3            | 7.4            | 7.4            | 7.3            | 7.1            | 7.4            | 7.5            |
| 0.25           | 0.32           | 0.09           | 0.36           | <0.04          | 0.21           | 0.42           | 0.44           | <0.04          | 0.05           | 0.23           | 0.05           | <0.04          | 0.06           | 0.29           | 0.13           | 1.1            | 0.19           | 0.28           |
| <0.09          | <0.09          | <0.09          | <0.09          | <0.09          | <0.09          | <0.09          | <0.09          | <0.09          | <0.09          | <0.09          | <0.09          | <0.09          | <0.09          | <0.09          | <0.09          | 0.13           | <0.09          | <0.09          |
| <0.05          | <0.05          | <0.05          | <0.05          | <0.05          | 0.07           | 0.07           | <0.05          | <0.05          | <0.05          | <0.05          | <0.05          | <0.05          | <0.05          | <0.05          | <0.05          | 0.08           | <0.05          | <0.05          |
| <0.05          | <0.05          | <0.05          | <0.05          | <0.05          | <0.05          | <0.05          | <0.05          | <0.05          | <0.05          | <0.05          | <0.05          | 0.05           | <0.05          | <0.05          | <0.05          | 0.08           | <0.05          | <0.05          |
| <0.05          | <0.05          | 0.06           | 0.05           | 0.07           | <0.05          | <0.05          | <0.05          | 0.06           | 0.05           | <0.05          | 0.05           | 0.07           | 0.06           | <0.05          | <0.05          | 0.08           | 0.10           | <0.05          |
| 0.22           | 0.16           | 0.18           | 0.15           | 0.17           | 0.16           | 0.14           | 0.18           | 0.24           | 0.70           | 0.25           | 0.17           | 0.28           | 0.27           | 0.21           | 0.19           | <0.08          | 0.30           | 0.45           |
| 0.11           | 0.08           | 0.06           | 0.06           | 0.07           | 0.08           | <0.05          | 0.07           | 0.09           | 0.19           | 0.10           | 0.09           | 0.10           | 0.14           | 0.10           | 0.12           | 0.17           | 0.14           | 0.10           |
| <0.05          | 0.05           | 0.05           | <0.04          | <0.05          | 0.06           | 0.06           | <0.05          | 0.06           | 0.13           | 0.06           | 0.07           | 0.06           | 0.05           | 0.08           | 0.05           | 0.13           | 0.08           | <0.04          |
| 0.39           | 0.34           | 0.42           | 0.37           | 0.40           | 0.42           | 0.38           | 0.41           | 0.46           | 1.1            | 0.47           | 0.41           | 0.49           | 0.47           | 0.46           | 0.43           | 0.55           | 0.48           | 0.63           |
| 0.19           | 0.17           | 0.13           | 0.16           | 0.18           | 0.18           | 0.16           | 0.15           | 0.19           | 0.46           | 0.21           | 0.16           | 0.21           | 0.21           | 0.16           | 0.19           | 0.24           | 0.19           | 0.29           |
| 6.8            | 6.5            | 6.8            | 6.8            | 6.8            | 6.8            | 6.9            | 6.7            | 7.0            | 10.6           | 7.2            | 7.0            | 7.2            | 7.3            | 7.1            | 7.0            | 7.2            | 6.9            | 7.7            |
| 2.6            | 2.4            | 2.5            | 2.4            | 2.6            | 2.5            | 2.5            | 2.5            | 2.6            | 3.5            | 2.7            | 2.6            | 2.6            | 2.7            | 2.7            | 2.7            | 2.8            | 2.7            | 2.5            |
| <0.03          | <0.03          | <0.03          | <0.03          | <0.03          | <0.03          | <0.03          | <0.03          | <0.03          | <0.03          | <0.03          | <0.03          | <0.03          | <0.03          | <0.03          | <0.03          | <0.03          | <0.03          | <0.03          |
| <0.01          | <0.01          | <0.01          | <0.01          | <0.01          | <0.01          | <0.01          | <0.01          | <0.01          | <0.01          | <0.01          | <0.01          | <0.01          | <0.01          | <0.01          | <0.01          | <0.01          | <0.01          | <0.01          |
| <0.01          | <0.01          | <0.01          | <0.01          | <0.01          | <0.01          | <0.01          | <0.01          | <0.01          | <0.01          | <0.01          | <0.01          | <0.01          | 0.03           | <0.01          | <0.01          | 5.8            | <0.01          | 0.01           |
| 0.05           | 0.05           | 0.07           | 0.04           | 0.07           | 0.06           | 0.06           | 0.08           | 0.02           | 0.03           | 0.05           | 0.05           | 0.04           | 0.04           | 0.02           | 0.02           | 0.04           | 0.05           | 0.04           |
| <0.02          | <0.02          | <0.02          | <0.02          | <0.02          | <0.02          | <0.02          | <0.02          | <0.02          | <0.02          | <0.02          | <0.02          | <0.02          | <0.02          | <0.02          | <0.02          | <0.02          | <0.02          | <0.02          |
| <0.01          | <0.01          | <0.01          | <0.01          | <0.01          | <0.01          | <0.01          | <0.01          | <0.01          | <0.01          | <0.01          | <0.01          | <0.01          | <0.01          | <0.01          | <0.01          | <0.01          | <0.01          | <0.01          |
| 0.01           | 0.02           | 0.02           | 0.01           | 0.01           | 0.02           | 0.02           | 0.01           | <0.01          | <0.01          | 0.02           | 0.01           | <0.01          | <0.01          | <0.01          | <0.01          | <0.01          | <0.01          | 0.12           |
| 0.04           | 0.03           | 0.03           | 0.02           | 0.04           | <0.01          | 0.04           | 0.02           | 0.01           | <0.01          | 0.01           | 0.02           | 0.01           | 0.03           | 0.01           | 0.04           | 0.03           | 0.01           | 0.01           |
| <0.02          | <0.02          | <0.02          | <0.02          | <0.02          | <0.02          | <0.02          | <0.02          | <0.02          | <0.02          | <0.02          | <0.02          | <0.02          | <0.02          | <0.02          | <0.02          | <0.02          | <0.02          | <0.02          |
| 0.03           | <0.03          | <0.03          | <0.03          | <0.03          | 0.03           | 0.03           | <0.03          | <0.03          | <0.03          | <0.03          | <0.03          | <0.03          | <0.03          | <0.03          | <0.03          | <0.03          | 0.05           | <0.03          |
| 0.55           | 0.59           | 0.47           | 0.48           | 0.53           | 0.46           | 0.48           | 0.49           | 0.49           | 0.60           | 0.50           | 0.50           | 0.47           | 0.48           | 0.50           | 0.43           | 0.41           | 0.56           | 0.39           |
| <0.02          | <0.02          | <0.02          | <0.02          | <0.02          | <0.02          | <0.02          | <0.02          | <0.02          | <0.02          | <0.02          | <0.02          | <0.02          | <0.02          | <0.02          | <0.02          | <0.02          | <0.02          | <0.02          |
| <0.02          | <0.02          | <0.02          | <0.02          | <0.02          | <0.02          | <0.02          | <0.02          | <0.02          | <0.02          | <0.02          | <0.02          | <0.02          | <0.02          | <0.02          | <0.02          | <0.02          | <0.02          | <0.02          |
|                |                |                |                |                |                |                |                |                |                |                |                |                |                |                |                |                |                |                |

## Appendix 4: EMPA data (cont.)

| RX6721<br>Irr. | RX6722<br>Irr. |
|----------------|----------------|----------------|----------------|----------------|----------------|----------------|----------------|----------------|----------------|----------------|----------------|----------------|----------------|----------------|----------------|----------------|----------------|----------------|
| 17411          | 17412          | 17415          | 17416          | 17417          | 17418          | 17419          | 17420          | 17421          | 17422          | 17423          | 17424          | 465            | 466            | 462            | 463            | 464            | 454            | 455            |
| 0.19           | 0.47           | 0.47           | 0.26           | 0.38           | 0.56           | 0.37           | 1.2            | 0.46           | 0.41           | 0.59           | 0.44           | 0.20           | 0.12           | 0.29           | 0.32           | 0.17           | 0.58           | 0.30           |
| 0.009          | <0.008         | <0.008         | 0.03           | 0.009          | <0.008         | 0.01           | 0.02           | <0.008         | <0.008         | 0.01           | <0.008         | <0.008         | 0.009          | 0.009          | 0.008          | <0.008         | <0.008         | <0.008         |
| 0.24           | 0.13           | 0.18           | 0.11           | 0.24           | 0.12           | 0.26           | 0.21           | 0.08           | 0.11           | 0.19           | 0.22           | <0.03          | 0.14           | 0.13           | 0.16           | 0.46           | 0.32           | 0.18           |
| 25.2           | 24.6           | 22.0           | 21.2           | 19.4           | 22.2           | 24.8           | 25.0           | 26.1           | 22.9           | 22.1           | 25.6           | 20.7           | 23.6           | 23.9           | 24.7           | 18.6           | 22.9           | 23.8           |
| 33.7           | 33.6           | 33.7           | 30.1           | 30.0           | 32.9           | 33.4           | 33.0           | 32.5           | 33.0           | 32.0           | 34.0           | 32.2           | 31.1           | 31.0           | 31.7           | 31.3           | 31.0           | 32.2           |
| 7.3            | 7.5            | 7.3            | 7.6            | 7.4            | 7.1            | 7.2            | 7.3            | 6.9            | 7.3            | 7.1            | 7.3            | 7.2            | 7.2            | 7.2            | 7.2            | 7.0            | 6.9            | 7.6            |
| 0.15           | 0.11           | 0.36           | 0.46           | 1.2            | 0.61           | 0.40           | 2.8            | 0.04           | 0.44           | 1.5            | 0.08           | 0.17           | 0.17           | <0.04          | 0.35           | <0.04          | <0.04          | 0.23           |
| <0.09          | <0.09          | <0.09          | <0.09          | <0.09          | <0.09          | <0.09          | <0.09          | <0.09          | <0.09          | <0.09          | <0.09          | <0.09          | <0.09          | <0.09          | <0.09          | <0.09          | <0.09          | <0.09          |
| <0.05          | <0.05          | <0.05          | <0.05          | <0.05          | <0.05          | <0.05          | <0.05          | <0.05          | <0.05          | <0.05          | <0.05          | <0.05          | <0.05          | <0.05          | <0.05          | 0.06           | <0.05          | 0.10           |
| <0.05          | <0.05          | <0.05          | <0.05          | <0.05          | <0.05          | <0.05          | <0.05          | <0.05          | <0.05          | <0.05          | <0.05          | <0.05          | <0.05          | <0.05          | <0.05          | <0.05          | <0.05          | <0.05          |
| 0.06           | <0.05          | 0.08           | <0.05          | <0.05          | <0.05          | 0.07           | 0.06           | 0.06           | 0.07           | <0.05          | 0.08           | <0.05          | 0.07           | 0.09           | 0.06           | 0.11           | 0.13           | 0.08           |
| 0.22           | 0.24           | 0.33           | 0.16           | 0.17           | 0.37           | 0.24           | 0.25           | 0.23           | 0.30           | 0.24           | 0.22           | 0.54           | 0.29           | 0.20           | 0.27           | 0.47           | 0.28           | 0.27           |
| 0.12           | 0.14           | 0.20           | 0.08           | 0.17           | 0.17           | 0.15           | 0.12           | 0.12           | 0.12           | 0.16           | 0.13           | 0.21           | 0.11           | 0.13           | 0.14           | 0.25           | 0.15           | 0.13           |
| 0.08           | 0.09           | 0.09           | 0.08           | 0.11           | 0.07           | 0.07           | 0.08           | 0.07           | 0.09           | 0.06           | 0.06           | 0.08           | 0.05           | 0.06           | 0.05           | 0.09           | 0.06           | 0.06           |
| 0.43           | 0.48           | 0.65           | 0.40           | 0.59           | 0.66           | 0.50           | 0.47           | 0.52           | 0.57           | 0.59           | 0.46           | 0.90           | 0.52           | 0.45           | 0.41           | 0.81           | 0.48           | 0.48           |
| 0.19           | 0.17           | 0.29           | 0.20           | 0.29           | 0.31           | 0.20           | 0.22           | 0.25           | 0.26           | 0.28           | 0.24           | 0.42           | 0.21           | 0.21           | 0.19           | 0.39           | 0.21           | 0.22           |
| 7.0            | 7.1            | 7.7            | 6.4            | 7.0            | 7.8            | 7.1            | 6.7            | 6.7            | 7.4            | 7.4            | 6.8            | 8.8            | 7.1            | 6.8            | 6.8            | 8.3            | 6.9            | 6.9            |
| 2.7            | 2.7            | 2.8            | 2.4            | 2.6            | 2.8            | 2.6            | 2.6            | 2.5            | 2.8            | 2.8            | 2.6            | 3.0            | 2.5            | 2.5            | 2.5            | 2.8            | 2.6            | 2.5            |
| <0.03          | <0.03          | <0.03          | <0.03          | <0.03          | <0.03          | <0.03          | <0.03          | <0.03          | <0.03          | 0.03           | <0.03          | <0.03          | <0.03          | <0.03          | <0.03          | <0.03          | <0.03          | <0.03          |
| <0.01          | <0.01          | <0.01          | <0.01          | <0.01          | <0.01          | <0.01          | <0.01          | <0.01          | <0.01          | <0.01          | <0.01          | <0.01          | <0.01          | <0.01          | <0.01          | <0.01          | <0.01          | <0.01          |
| <0.01          | <0.01          | <0.01          | <0.01          | <0.01          | <0.01          | <0.01          | 0.04           | <0.01          | <0.01          | <0.01          | <0.01          | <0.01          | <0.01          | <0.01          | <0.01          | <0.01          | <0.01          | <0.01          |
| 0.03           | 0.05           | 0.07           | 0.06           | 0.08           | 0.08           | 0.06           | 0.06           | 0.04           | 0.06           | 0.08           | 0.05           | 0.04           | 0.02           | 0.04           | 0.03           | 0.05           | 0.05           | 0.03           |
| <0.02          | <0.02          | <0.02          | <0.02          | <0.02          | <0.02          | <0.02          | <0.02          | <0.02          | <0.02          | <0.02          | <0.02          | <0.02          | <0.02          | <0.02          | <0.02          | <0.02          | <0.02          | <0.02          |
| <0.01          | <0.01          | <0.01          | <0.01          | <0.01          | <0.01          | <0.01          | <0.01          | <0.01          | <0.01          | <0.01          | <0.01          | <0.01          | <0.01          | <0.01          | <0.01          | <0.01          | <0.01          | <0.01          |
| <0.01          | <0.01          | 0.02           | 0.02           | 0.02           | 0.03           | 0.03           | 0.11           | 0.02           | 0.01           | 0.03           | 0.03           | <0.01          | 0.01           | <0.01          | 0.02           | <0.01          | 0.02           | <0.01          |
| <0.01          | 0.03           | 0.06           | 0.02           | 0.04           | 0.04           | 0.04           | 0.11           | 0.04           | 0.04           | 0.03           | 0.03           | 0.02           | 0.02           | 0.05           | 0.02           | 0.02           | 0.04           | 0.02           |
| <0.02          | <0.02          | 0.07           | 0.12           | 0.13           | 0.02           | <0.02          | <0.02          | 0.02           | 0.05           | 0.05           | <0.02          | <0.02          | <0.02          | <0.02          | <0.02          | <0.02          | <0.02          | <0.02          |
| <0.03          | <0.03          | 0.03           | <0.02          | 0.04           | <0.02          | 0.05           | 0.05           | <0.03          | <0.03          | <0.03          | 0.07           | <0.03          | <0.03          | 0.04           | 0.03           | 0.12           | 0.07           | 0.05           |
| 0.45           | 0.54           | 0.69           | 0.36           | 0.59           | 0.57           | 0.63           | 0.53           | 0.43           | 0.45           | 0.49           | 0.70           | 0.67           | 0.67           | 0.74           | 0.79           | 0.94           | 0.80           | 0.62           |
| <0.02          | <0.02          | <0.02          | <0.02          | <0.02          | <0.02          | <0.02          | <0.02          | <0.02          | <0.02          | <0.02          | <0.02          | <0.02          | <0.02          | <0.02          | <0.02          | <0.02          | <0.02          | <0.02          |
| <0.02          | <0.02          | <0.02          | <0.02          | <0.02          | <0.02          | <0.02          | <0.02          | <0.02          | <0.02          | <0.02          | <0.02          | <0.02          | <0.02          | <0.02          | <0.02          | <0.02          | <0.02          | <0.02          |
|                |                |                |                |                |                |                |                |                |                |                |                |                |                |                |                |                |                |                |

## Appendix 4: EMPA data (cont.)

| RX6722<br>Irr. | RX6714<br>Synchysite |
|----------------|----------------|----------------|----------------|----------------|----------------|----------------|----------------------|----------------------|----------------------|----------------------|----------------------|----------------------|----------------------|----------------------|----------------------|----------------------|
| 456            | 457            | 458            | 459            | 460            | 461            | 467            | 17294                | 17296                | 17298                | 17299                | 17285                | 17286                | 17287                | 17289                | 17290                | 17291                |
| 0.33           | 0.29           | 0.36           | 0.22           | 0.29           | 0.10           | 0.10           | 12.6                 | 12.3                 | 12.4                 | 12.4                 | 9.8                  | 12.3                 | 12.1                 | 12.5                 | 12.3                 | 12.4                 |
| <0.008         | 0.02           | <0.008         | <0.008         | 0.01           | <0.008         | <0.008         | 0.10                 | 0.10                 | 0.07                 | 0.11                 | 0.02                 | 0.04                 | 0.33                 | <0.008               | <0.008               | 0.01                 |
| 0.08           | 0.11           | 0.22           | 0.04           | 0.36           | 0.07           | 0.11           | <0.02                | <0.02                | <0.02                | <0.02                | <0.02                | <0.02                | <0.02                | <0.02                | 0.03                 | <0.02                |
| 23.2           | 20.3           | 21.7           | 23.1           | 19.8           | 21.5           | 19.6           | 11.1                 | 11.0                 | 11.1                 | 11.0                 | 8.4                  | 7.9                  | 10.8                 | 10.5                 | 12.9                 | 10.5                 |
| 32.9           | 29.7           | 31.9           | 31.3           | 32.4           | 32.0           | 32.1           | 23.5                 | 22.8                 | 23.1                 | 23.3                 | 23.6                 | 24.4                 | 24.1                 | 25.4                 | 28.2                 | 23.3                 |
| 7.2            | 7.0            | 7.1            | 6.9            | 6.9            | 7.2            | 7.3            | 3.6                  | 3.4                  | 3.8                  | 3.8                  | 5.2                  | 3.5                  | 2.6                  | 3.7                  | 3.6                  | 3.6                  |
| 0.36           | 2.7            | <0.04          | 0.11           | <0.04          | <0.04          | 0.30           | 0.14                 | 0.23                 | 0.10                 | 0.12                 | 0.08                 | 0.13                 | 0.18                 | <0.03                | 0.11                 | 0.09                 |
| <0.09          | <0.09          | <0.09          | <0.09          | <0.09          | <0.09          | <0.09          | <0.09                | <0.09                | <0.09                | <0.09                | <0.09                | <0.09                | 0.13                 | <0.09                | <0.09                | <0.09                |
| <0.05          | <0.05          | 0.08           | <0.05          | 0.07           | <0.05          | <0.05          | <0.05                | <0.05                | <0.05                | <0.05                | <0.05                | <0.05                | <0.05                | <0.05                | <0.05                | <0.05                |
| <0.05          | <0.05          | <0.05          | <0.05          | <0.05          | <0.05          | <0.05          | <0.05                | <0.05                | <0.05                | <0.05                | <0.05                | <0.05                | <0.05                | <0.05                | <0.05                | <0.05                |
| 0.09           | 0.05           | 0.16           | 0.07           | 0.13           | 0.09           | 0.08           | 0.13                 | 0.10                 | 0.07                 | 0.09                 | <0.05                | <0.05                | 0.09                 | 0.09                 | 0.07                 | 0.09                 |
| 0.37           | 0.30           | 0.41           | 0.33           | 0.60           | 0.39           | 0.44           | 0.61                 | 0.59                 | 0.62                 | 0.65                 | 0.74                 | 0.91                 | 0.62                 | 0.99                 | 0.62                 | 0.70                 |
| 0.14           | 0.13           | 0.23           | 0.15           | 0.29           | 0.22           | 0.26           | 0.39                 | 0.41                 | 0.41                 | 0.37                 | 0.32                 | 0.32                 | 0.44                 | 0.49                 | 0.38                 | 0.47                 |
| 0.07           | 0.06           | 0.07           | 0.07           | 0.09           | 0.08           | 0.09           | 0.08                 | 0.09                 | 0.09                 | 0.08                 | 0.07                 | 0.09                 | 0.10                 | 0.12                 | 0.13                 | 0.12                 |
| 0.58           | 0.62           | 0.56           | 0.57           | 0.92           | 0.62           | 0.73           | 0.92                 | 0.90                 | 0.93                 | 0.97                 | 1.1                  | 1.3                  | 1.1                  | 1.2                  | 1.0                  | 1.0                  |
| 0.21           | 0.27           | 0.26           | 0.26           | 0.46           | 0.29           | 0.31           | 0.40                 | 0.41                 | 0.43                 | 0.44                 | 0.51                 | 0.56                 | 0.51                 | 0.62                 | 0.46                 | 0.49                 |
| 7.7            | 7.3            | 7.6            | 7.1            | 8.8            | 7.7            | 8.7            | 7.9                  | 7.9                  | 7.9                  | 8.0                  | 8.6                  | 9.5                  | 8.3                  | 9.4                  | 8.8                  | 8.1                  |
| 2.7            | 2.5            | 2.7            | 2.6            | 2.9            | 2.8            | 2.9            | 2.5                  | 2.5                  | 2.5                  | 2.5                  | 2.5                  | 2.7                  | 2.5                  | 2.8                  | 2.9                  | 2.5                  |
| <0.03          | <0.03          | <0.03          | <0.03          | <0.03          | <0.03          | <0.03          | <0.03                | <0.02                | <0.03                | <0.03                | <0.03                | <0.02                | <0.03                | <0.03                | <0.03                | <0.02                |
| <0.01          | <0.01          | <0.01          | <0.01          | <0.01          | <0.01          | <0.01          | <0.01                | <0.01                | <0.01                | <0.01                | <0.01                | <0.01                | <0.01                | <0.01                | <0.01                | <0.01                |
| <0.01          | 0.02           | <0.01          | <0.01          | <0.01          | <0.01          | <0.01          | <0.01                | 0.02                 | <0.01                | 0.03                 | <0.01                | <0.01                | 0.92                 | <0.01                | <0.01                | <0.01                |
| 0.03           | 0.03           | 0.04           | 0.04           | 0.04           | 0.03           | 0.05           | 0.06                 | 0.05                 | 0.03                 | 0.04                 | 0.06                 | 0.03                 | 0.04                 | 0.05                 | 0.03                 | 0.03                 |
| <0.02          | <0.02          | <0.02          | <0.02          | <0.02          | <0.02          | <0.02          | <0.02                | <0.02                | <0.02                | <0.02                | <0.02                | <0.02                | <0.02                | <0.02                | <0.02                | <0.02                |
| <0.01          | <0.01          | <0.01          | <0.01          | <0.01          | <0.01          | <0.01          | <0.01                | <0.01                | <0.01                | <0.01                | <0.01                | <0.01                | <0.01                | <0.01                | <0.01                | <0.01                |
| 0.02           | 0.03           | 0.01           | <0.01          | 0.01           | <0.01          | <0.01          | <0.01                | <0.01                | <0.01                | <0.01                | <0.01                | <0.01                | 0.01                 | <0.01                | <0.01                | <0.01                |
| 0.04           | 0.04           | 0.04           | 0.03           | 0.05           | 0.02           | 0.02           | <0.009               | <0.009               | 0.02                 | 0.01                 | 0.03                 | <0.009               | 0.03                 | 0.02                 | <0.009               | 0.03                 |
| <0.02          | <0.02          | <0.02          | <0.02          | <0.02          | <0.02          | <0.02          | <0.02                | <0.02                | <0.02                | <0.02                | <0.02                | <0.02                | <0.02                | <0.02                | <0.02                | <0.02                |
| <0.03          | <0.03          | <0.03          | <0.03          | 0.03           | <0.03          | <0.03          | <0.02                | <0.02                | <0.02                | <0.02                | <0.02                | <0.02                | <0.02                | <0.02                | <0.02                | <0.02                |
| 0.63           | 0.58           | 0.82           | 0.53           | 0.92           | 0.76           | 0.75           | 1.3                  | 1.5                  | 1.3                  | 1.1                  | 0.87                 | 0.84                 | 1.3                  | 1.1                  | 1.1                  | 1.5                  |
| <0.02          | <0.02          | <0.02          | <0.02          | <0.02          | <0.02          | <0.02          | <0.02                | <0.02                | <0.02                | <0.02                | <0.02                | <0.02                | <0.02                | <0.02                | <0.02                | <0.02                |
| <0.02          | <0.02          | <0.02          | <0.02          | <0.02          | <0.02          | <0.02          | <0.02                | <0.02                | <0.02                | <0.02                | <0.02                | <0.02                | <0.02                | <0.02                | <0.02                | <0.02                |
|                |                |                |                |                |                |                |                      |                      |                      |                      |                      |                      |                      |                      |                      |                      |

Appendix 4: EMPA data (cont.)

| RX6714<br>Synchysite | RX6726<br>Synchysite |
|----------------------|----------------------|----------------------|----------------------|----------------------|----------------------|----------------------|----------------------|----------------------|----------------------|
| 17292                | 17426                | 17427                | 17428                | 17429                | 17430                | 17431                | 17432                | 17436                | 17441                |
| 12.5                 | 12.3                 | 12.5                 | 12.5                 | 12.5                 | 12.4                 | 12.5                 | 12.6                 | 12.5                 | 12.7                 |
| 0.02                 | 0.06                 | 0.05                 | <0.008               | <0.008               | 0.03                 | 0.03                 | <0.008               | 0.02                 | 0.01                 |
| <0.02                | <0.02                | <0.02                | <0.02                | <0.02                | <0.02                | <0.02                | <0.02                | <0.02                | <0.02                |
| 7.8                  | 9.3                  | 8.9                  | 9.0                  | 10.1                 | 8.9                  | 9.2                  | 9.9                  | 9.9                  | 9.4                  |
| 24.0                 | 23.7                 | 22.6                 | 22.9                 | 23.9                 | 22.9                 | 23.6                 | 23.5                 | 23.8                 | 22.7                 |
| 3.6                  | 3.7                  | 3.8                  | 3.5                  | 3.4                  | 3.4                  | 3.7                  | 3.1                  | 3.8                  | 3.6                  |
| 0.19                 | 0.12                 | <0.03                | <0.04                | 0.07                 | <0.03                | 0.04                 | 0.05                 | 0.04                 | 0.05                 |
| <0.09                | <0.09                | <0.09                | <0.09                | <0.09                | <0.09                | <0.09                | <0.09                | <0.09                | <0.09                |
| <0.05                | <0.05                | <0.05                | <0.05                | <0.05                | <0.05                | <0.05                | <0.05                | <0.05                | <0.05                |
| <0.05                | <0.05                | <0.05                | <0.05                | <0.05                | <0.05                | <0.05                | <0.05                | <0.05                | <0.05                |
| 0.05                 | <0.05                | <0.05                | <0.05                | <0.05                | <0.05                | <0.05                | <0.05                | <0.05                | <0.05                |
| 0.97                 | 0.83                 | 0.83                 | 0.87                 | 0.74                 | 0.91                 | 0.73                 | 0.75                 | 0.77                 | 0.94                 |
| 0.38                 | 0.24                 | 0.23                 | 0.21                 | 0.27                 | 0.25                 | 0.22                 | 0.29                 | 0.29                 | 0.33                 |
| 0.11                 | 0.08                 | 0.06                 | <0.04                | 0.08                 | 0.09                 | 0.09                 | 0.07                 | 0.09                 | 0.10                 |
| 1.4                  | 1.3                  | 1.4                  | 1.5                  | 1.2                  | 1.5                  | 1.2                  | 1.1                  | 1.2                  | 1.4                  |
| 0.59                 | 0.61                 | 0.68                 | 0.72                 | 0.60                 | 0.74                 | 0.59                 | 0.54                 | 0.57                 | 0.70                 |
| 9.8                  | 9.1                  | 10.2                 | 10.4                 | 8.4                  | 10.0                 | 9.7                  | 8.6                  | 8.5                  | 9.1                  |
| 2.8                  | 2.8                  | 2.9                  | 2.8                  | 2.6                  | 2.8                  | 2.8                  | 2.6                  | 2.6                  | 2.7                  |
| <0.03                | <0.02                | <0.03                | <0.02                | <0.02                | <0.02                | <0.03                | <0.03                | <0.02                | <0.03                |
| <0.01                | <0.01                | <0.01                | <0.01                | <0.01                | <0.01                | <0.01                | <0.01                | <0.01                | <0.01                |
| <0.01                | 0.49                 | <0.01                | <0.01                | <0.01                | <0.01                | 0.02                 | <0.01                | <0.01                | <0.01                |
| 0.03                 | 0.05                 | 0.04                 | 0.05                 | 0.06                 | 0.06                 | 0.05                 | 0.05                 | 0.07                 | 0.06                 |
| <0.02                | <0.02                | <0.02                | <0.02                | <0.02                | <0.02                | <0.02                | <0.02                | <0.02                | <0.02                |
| <0.01                | <0.01                | <0.01                | <0.01                | <0.01                | <0.01                | <0.01                | <0.01                | <0.01                | <0.01                |
| <0.01                | <0.01                | <0.01                | <0.01                | <0.01                | <0.01                | 0.02                 | 0.01                 | 0.02                 | <0.01                |
| 0.02                 | <0.009               | 0.03                 | 0.02                 | 0.01                 | 0.02                 | <0.009               | 0.01                 | <0.009               | 0.01                 |
| <0.02                | <0.02                | <0.02                | <0.02                | <0.02                | <0.02                | 0.05                 | <0.02                | <0.02                | <0.02                |
| <0.02                | <0.02                | <0.02                | <0.02                | <0.02                | <0.02                | <0.02                | <0.02                | <0.02                | <0.02                |
| 0.95                 | 0.55                 | 0.55                 | 0.49                 | 0.66                 | 0.60                 | 0.47                 | 0.71                 | 0.81                 | 0.90                 |
| <0.02                | <0.02                | <0.02                | <0.02                | <0.02                | <0.02                | <0.02                | <0.02                | <0.02                | <0.02                |
| <0.02                | <0.02                | <0.02                | <0.02                | <0.02                | <0.02                | <0.02                | <0.02                | <0.02                | <0.02                |
|                      |                      |                      |                      |                      |                      |                      |                      |                      |                      |
