# Supplementary material
Source: MDPI journal article supplement (https://www.mdpi.com/2075-163X/7/10/202)
Supplement: s1 [file s1 › Table S6.pdf]

Table S6: Full LA-ICP-MS dataset for REE fluorocarbonates (in ppm).  
Type bastnasite abbreviations: Mx-stby, Matrix-stubby; Mx-f.g., Matrix-fine grained; Irr., Irregular sulfide associated; CR, Clast Replacement.

| RX Sample | RX6709  |
|-----------|---------|---------|---------|---------|---------|---------|---------|---------|---------|---------|---------|---------|---------|---------|---------|---------|---------|---------|---------|---------|---------|---------|---------|---------|---------|---------|---------|
| Type      | Mx-Stby |
| Output #  | 1_42    | 1_43    | 1_44    | 1_45    | 1_47    | 1_56    | 1_48    | 1_49    | 1_50    | 1_51    | 1_53    | 1_54    | 1_55    | 1_15    | 1_24    | 1_25    | 1_26    | 1_16    | 1_17    | 1_18    | 1_19    | 1_20    | 1_21    | 1_22    | 1_23    | 1_7     | 1_8     |
| La        | 198100  | 193200  | 186100  | 184000  | 202000  | 197600  | 185200  | 188700  | 182000  | 179400  | 195000  | 199000  | 195400  | 180700  | 202100  | 198100  | 182000  | 176900  | 178000  | 189900  | 171000  | 185300  | 169800  | 166800  | 192000  | 183000  | 211000  |
| Pr        | 39690   | 38520   | 36980   | 38200   | 36500   | 36960   | 35400   | 37400   | 36900   | 37000   | 37400   | 35600   | 36790   | 38500   | 40300   | 35670   | 38360   | 38000   | 36500   | 36800   | 36800   | 36000   | 37610   | 35000   | 35600   | 36500   | 35100   |
| Nd        | 114900  | 108800  | 113000  | 110100  | 106200  | 105400  | 104100  | 107800  | 100200  | 101100  | 105400  | 101900  | 102000  | 110500  | 119000  | 94500   | 119000  | 107500  | 101600  | 102900  | 100700  | 105100  | 109200  | 110000  | 98900   | 101600  | 102600  |
| Sm        | 10210   | 9130    | 8600    | 9730    | 8510    | 8970    | 9080    | 9040    | 8150    | 8470    | 9570    | 7680    | 8470    | 9930    | 10450   | 7230    | 10610   | 10550   | 9840    | 9170    | 10320   | 9270    | 10360   | 10000   | 8270    | 8640    | 8160    |
| Eu        | 3050    | 2653    | 2530    | 2780    | 2507    | 2760    | 2760    | 2730    | 2400    | 2620    | 2890    | 2380    | 2406    | 2988    | 3130    | 2070    | 3170    | 3300    | 3130    | 2730    | 2920    | 2770    | 3290    | 3080    | 2460    | 2670    | 2420    |
| Gd        | 3560    | 2930    | 2920    | 3180    | 2927    | 3178    | 3180    | 2990    | 2750    | 2900    | 3360    | 2717    | 2740    | 3550    | 3640    | 2310    | 3760    | 3880    | 3510    | 3080    | 3250    | 3370    | 3720    | 3460    | 2740    | 3020    | 2940    |
| Tb        | 314     | 261     | 251     | 283     | 245     | 278     | 279     | 268     | 228     | 267     | 302     | 230     | 233     | 324     | 302     | 188     | 333     | 351     | 343     | 277     | 312     | 305     | 358     | 330     | 231     | 298     | 243     |
| Dy        | 1271    | 1027    | 1009    | 1153    | 945     | 1112    | 1120    | 1061    | 928     | 1020    | 1237    | 873     | 929     | 1480    | 1225    | 718     | 1400    | 1391    | 1470    | 1169    | 1210    | 1273    | 1500    | 1370    | 921     | 1200    | 990     |
| Y         | 3170    | 2550    | 2430    | 2730    | 2500    | 3040    | 2740    | 2690    | 2280    | 2460    | 2930    | 2316    | 2270    | 3480    | 2930    | 1910    | 3320    | 3510    | 3620    | 3180    | 3180    | 3070    | 3770    | 3390    | 2370    | 2970    | 2540    |
| Ho        | 175     | 140     | 133     | 160     | 123     | 154     | 153     | 142     | 131     | 145     | 164     | 118     | 127     | 190     | 163     | 99.3    | 193     | 198     | 208     | 164     | 186     | 176     | 215     | 196     | 120     | 166     | 134     |
| Er        | 345     | 271     | 252     | 321     | 240     | 314     | 300     | 287     | 241     | 268     | 313     | 242     | 247     | 383     | 323     | 194     | 382     | 403     | 391     | 334     | 385     | 346     | 436     | 391     | 244     | 328     | 273     |
| Tm        | 30.5    | 24.6    | 23.8    | 30.0    | 18.9    | 27.7    | 27.0    | 27.7    | 21.3    | 24.9    | 26.6    | 21.7    | 22.3    | 34.3    | 31.6    | 21.0    | 34.7    | 39.1    | 36.2    | 29.7    | 33.7    | 32.6    | 43.1    | 39.6    | 22.7    | 26.1    | 20.3    |
| Yb        | 134     | 111     | 99.0    | 136     | 82.5    | 126     | 119     | 122     | 92.0    | 111     | 117     | 88.7    | 99.2    | 158     | 135     | 104     | 155     | 174     | 172     | 136     | 160     | 146     | 197     | 169     | 98.0    | 116     | 95.0    |
| Lu        | 14.3    | 11.6    | 9.7     | 14.7    | 7.9     | 13.1    | 12.6    | 12.1    | 9.6     | 11.6    | 12.0    | 9.4     | 10.1    | 17.0    | 13.5    | 10.9    | 15.9    | 18.2    | 18.8    | 14.0    | 16.5    | 16.4    | 21.7    | 18.1    | 10.3    | 11.7    | 10.1    |
| Ca        | 850     | 400     | 750     | <267    | 700     | 2010    | 690     | <256    | <284    | 220     | <309    | 290     | 460     | <846    | <1086   | 1660    | <663    | <697    | <633    | 1270    | <463    | <1228   | 2200    | <566    | <696    | <659    | <630    |
| Sr        | 1900    | 1500    | 937     | 189     | 201     | 4560    | 487     | 224     | 567     | 127     | 182     | 201     | 610     | 1250    | 1260    | 2300    | 169     | 784     | 205     | 2710    | 270     | 180     | 1150    | 600     | 261     | 124     | 141     |
| Ba        | 370     | 380     | 70.0    | 9.4     | 35.9    | 145     | 20.5    | 10.9    | 23.4    | 5.2     | 10.8    | 7.7     | 20.6    | 48.0    | 63.0    | 740     | 14.9    | 29.1    | 12.4    | 162     | 10.0    | 13.6    | 44.1    | 44.0    | 12.2    | 14.7    | 5.0     |
| Cu        | 200     | 73.0    | 18.1    | 8.7     | 16.5    | 1500    | 16.6    | 9.7     | 28.8    | 71.0    | 10.8    | 13.4    | 73.0    | 149     | 280     | 1800    | 17.1    | 26.8    | 40.3    | 158     | <3.7    | 140     | 51.0    | 36.0    | 28.5    | <5.3    | 13.1    |
| Al        | 4950    | 4730    | 14600   | 182     | 4500    | 26600   | 1400    | 322     | 4000    | 136     | 890     | 820     | 2370    | 9100    | 9100    | 5800    | 1630    | 2070    | 184     | 7250    | 267     | er      | 5900    | 1110    | 1200    | 1460    | 37.0    |
| Fe        | 2550    | 2700    | 1080    | 107     | 12500   | 16000   | 2140    | 224     | 1010    | 44.0    | 348     | 83.0    | 850     | 1600    | 940     | 7100    | 193     | er      | 120     | 3050    | 81.0    | 4100    | 13100   | 95.0    | 228     | 140     | 107     |
| Mn        | 1.3     | 2.2     | <2.0    | <1.0    | 3.1     | 46.0    | 1.3     | <0.93   | 1.3     | <0.95   | <0.99   | <1.0    | <1.3    | 4.1     | <4.7    | 12.3    | <3.1    | <2.7    | <2.1    | 3.6     | <2.1    | er      | 27.0    | <1.9    | <3.0    | <2.7    | <2.5    |
| P         | 2160    | 1530    | 820     | 77.0    | <62.6   | 9200    | 446     | 119     | 286     | 63.0    | 75.0    | 95.0    | 450     | 1300    | 1160    | 3380    | <143    | 630     | <157    | 3100    | <140    | <298    | 1310    | 570     | <155    | <136    | <141    |
| Na        | 220     | 236     | 460     | <18.6   | 97.0    | 461     | 135     | <16.8   | 129     | <15.5   | 43.0    | <14.5   | 84.0    | 270     | 550     | 130     | 76.0    | 69.0    | <38.8   | 337     | <42.1   | <91.2   | 171     | 46.0    | <45.0   | 73.0    | 68.0    |
| Nb        | 2.1     | 2.0     | 3.1     | <0.001  | 28.1    | 1.6     | 140     | 0.75    | 4.2     | 0.09    | 0.32    | 10.4    | <0.04   | 0.59    | <0.001  | 250     | 0.26    | 1.0     | <0.06   | 1.6     | <0.001  | <0.001  | <0.18   | er      | er      | <0.001  | er      |
| Sc        | <0.44   | <0.46   | <0.61   | <0.32   | 2.6     | 1.0     | 4.1     | <0.35   | <0.42   | <0.33   | <0.36   | 0.43    | <0.40   | <0.90   | <1.6    | 4.0     | <0.94   | <0.75   | <0.77   | <1.1    | <0.69   | <1.4    | <2.0    | <0.68   | <0.98   | <0.81   | <0.88   |
| Si        | 1220    | 1150    | 14900   | <404    | 5700    | 13600   | 950     | <389    | 2900    | <311    | 1110    | er      | 840     | er      | 10800   | <1038   | 2100    | <925    | <779    | 2100    | <966    | <1656   | 5800    | <928    | 1660    | 2400    | <957    |
| W         | 0.98    | 0.70    | er      | <0.001  | 9.1     | 0.40    | 3.7     | 0.14    | 0.18    | er      | 0.11    | 0.30    | <0.08   | <0.001  | <0.001  | 7.5     | <0.001  | er      | <0.13   | 0.48    | <0.001  | <0.001  | er      | <0.001  | er      | <0.16   | <0.001  |
| Zr        | 5.2     | 0.74    | 5.4     | 1.8     | 4.3     | 5.2     | 3.3     | 0.51    | 0.18    | 0.24    | 5.0     | 0.91    | 7.3     | 11.4    | 9.8     | 430     | 2.4     | 0.60    | 1.3     | 7.0     | 0.21    | 0.85    | <0.31   | 0.15    | 2.9     | 0.85    | 0.27    |
| As        | 465     | 401     | 398     | 429     | 397     | 508     | 403     | 396     | 371     | 379     | 393     | 378     | 392     | 431     | 475     | 412     | 422     | 439     | 415     | 468     | 410     | 411     | 475     | 435     | 390     | 417     | 373     |
| Bi        | 0.89    | 0.59    | 0.27    | 0.11    | 0.87    | 2.2     | 0.98    | 0.26    | 0.37    | 0.15    | <0.10   | 0.12    | 0.16    | 0.22    | 0.95    | 17.1    | <0.28   | 0.31    | 0.20    | 4.3     | 0.58    | <0.54   | 0.94    | 0.36    | <0.26   | <0.25   | 0.25    |
| Hf        | 0.42    | <0.001  | <0.09   | 0.03    | 0.12    | <0.07   | 0.53    | er      | <0.05   | <0.001  | 0.18    | 0.14    | 0.15    | 0.23    | <0.001  | 9.6     | <0.001  | <0.001  | <0.001  | 0.23    | er      | <0.001  | <0.001  | <0.001  | <0.001  | <0.001  | <0.001  |
| Ta        | 0.06    | <0.02   | 0.23    | <0.01   | 0.42    | 0.03    | 7.3     | 0.05    | 0.14    | <0.001  | <0.001  | 0.31    | <0.001  | er      | <0.001  | 3.9     | <0.001  | 0.06    | <0.001  | <0.001  | <0.001  | <0.001  | <0.001  | <0.001  | <0.001  | <0.001  | <0.001  |
| Th        | 125     | 141     | 85.0    | 16.9    | 2313    | 348     | 244     | 52.0    | 123     | 39.6    | 140     | 72.0    | 73.0    | 65.0    | 127     | 54.0    | 16.7    | 35.5    | 26.0    | 84.0    | 5.3     | 12.5    | 9.2     | 7.6     | 46.9    | 25.2    | 120     |
| U         | 12.6    | 4.5     | 5.3     | 8.7     | 13.1    | 7.1     | 8.6     | 0.99    | 3.1     | 3.7     | 10.8    | 3.4     | 13.2    | 24.8    | 8.3     | 930     | 8.9     | 8.0     | 14.7    | 12.7    | 2.7     | 4.1     | 2.7     | 0.63    | 8.5     | 3.2     | 15.1    |
| Total Pb  | 29.8    | 25.3    | 15.9    | 7.0     | 221     | 62.6    | 37.8    | 8.1     | 13.7    | 6.4     | 16.2    | 8.2     | 13.3    | 17.4    | 29.6    | 97.5    | 8.4     | 14.8    | 9.9     | 39.3    | 10.5    | 7.9     | 24.3    | 11.4    | 11.3    | 6.7     | 14.1    |

'<' indicates minimum detection limit  
'er' indicates values with too high analytical error

| RX6709<br>Mx-Stby | RX6710<br>Mx-Stby |
|-------------------|-------------------|-------------------|-------------------|-------------------|-------------------|-------------------|-------------------|-------------------|-------------------|-------------------|-------------------|-------------------|-------------------|-------------------|-------------------|-------------------|-------------------|-------------------|-------------------|-------------------|-------------------|-------------------|-------------------|-------------------|-------------------|-------------------|-------------------|-------------------|
| 1_9               | 1_10              | 1_11              | 1_12              | 1_13              | 1_14              | 1_1               | 1_2               | 1_3               | 1_4               | 1_5               | 1_6               | 1_28              | 1_32              | 1_37              | 1_38              | 1_39              | 1_40              | 1_41              | 1_57              | 1_58              | 1_59              | 1_60              | 1_61              | 1_62              | 1_63              | 1_64              | 1_65              |                   |
| 212200            | 174400            | 186000            | 192000            | 166000            | 217500            | 190100            | 237000            | 182600            | 190000            | 179000            | 171000            | 210000            | 200100            | 196000            | 204300            | 182100            | 201000            | 188800            | 170300            | 160100            | 177200            | 167500            | 169300            | 177500            | 172300            | 176300            | 162400            |                   |
| 34590             | 38200             | 39500             | 37370             | 37100             | 35660             | 38370             | 40600             | 38200             | 37600             | 36400             | 39700             | 34100             | 36560             | 38000             | 37120             | 37720             | 38400             | 38840             | 32100             | 33800             | 32800             | 35110             | 34500             | 33170             | 32110             | 32300             | 34700             |                   |
| 90100             | 106600            | 104900            | 107100            | 109400            | 96300             | 111300            | 123500            | 100500            | 99400             | 111000            | 107700            | 92300             | 98300             | 111100            | 102100            | 108100            | 109600            | 109600            | 90400             | 105800            | 93300             | 102300            | 99650             | 94100             | 88800             | 88700             | 107500            |                   |
| 6320              | 10710             | 10130             | 9170              | 10810             | 7160              | 10240             | 9530              | 9700              | 8960              | 10190             | 9510              | 6510              | 8260              | 10980             | 8320              | 10130             | 9450              | 9830              | 7360              | 9740              | 7340              | 10360             | 9200              | 8050              | 7050              | 7020              | 11730             |                   |
| 1656              | 3190              | 3220              | 2700              | 3300              | 1900              | 3250              | 2490              | 2950              | 2600              | 2940              | 2900              | 1705              | 2420              | 3300              | 2320              | 3090              | 2760              | 3010              | 2060              | 3060              | 2110              | 3290              | 2960              | 2310              | 1926              | 1916              | 3770              |                   |
| 1751              | 3900              | 3680              | 3040              | 3810              | 2120              | 3840              | 3210              | 3260              | 3020              | 3990              | 3430              | 1849              | 2760              | 4110              | 2920              | 3490              | 3230              | 3410              | 2570              | 3570              | 2240              | 4400              | 3520              | 2657              | 2325              | 2270              | 5180              |                   |
| 113               | 355               | 345               | 276               | 355               | 149               | 349               | 233               | 303               | 270               | 336               | 308               | 123               | 227               | 359               | 227               | 319               | 282               | 304               | 207               | 318               | 187               | 426               | 316               | 213               | 190               | 186               | 517               |                   |
| 400               | 1541              | 1484              | 1157              | 1532              | 543               | 1640              | 872               | 1274              | 970               | 1360              | 1370              | 402               | 880               | 1530              | 885               | 1330              | 1130              | 1230              | 798               | 1306              | 703               | 1793              | 1290              | 811               | 726               | 673               | 2170              |                   |
| 912               | 4140              | 3560              | 2800              | 3970              | 1430              | 3920              | 1960              | 3240              | 2540              | 3540              | 3110              | 1010              | 2250              | 3810              | 2360              | 3310              | 2840              | 3140              | 2120              | 3330              | 1710              | 5110              | 3520              | 2120              | 1930              | 1810              | 6450              |                   |
| 41.2              | 223               | 197               | 166               | 222               | 61.0              | 217               | 102               | 174               | 131               | 186               | 173               | 45.9              | 117               | 215               | 122               | 185               | 148               | 171               | 109               | 180               | 91.0              | 254               | 180               | 111               | 93.2              | 92.3              | 307               |                   |
| 68.7              | 457               | 436               | 311               | 459               | 117               | 423               | 187               | 342               | 272               | 388               | 401               | 82.0              | 241               | 430               | 246               | 384               | 297               | 337               | 226               | 351               | 163               | 505               | 369               | 219               | 182               | 166               | 615               |                   |
| 5.0               | 44.8              | 36.8              | 30.3              | 43.0              | 9.9               | 36.7              | 14.2              | 31.7              | 25.5              | 36.7              | 33.1              | 6.6               | 20.4              | 44.4              | 22.8              | 34.7              | 27.4              | 31.0              | 19.1              | 33.6              | 16.5              | 46.8              | 36.9              | 20.0              | 15.7              | 14.5              | 59.2              |                   |
| 20.4              | 236               | 176               | 138               | 214               | 38.0              | 172               | 61.0              | 143               | 119               | 152               | 170               | 28.2              | 93.0              | 188               | 94.9              | 151               | 117               | 141               | 88.1              | 166               | 70.3              | 223               | 180               | 86.7              | 70.1              | 61.5              | 277               |                   |
| 1.7               | 21.2              | 19.6              | 13.4              | 20.9              | 3.3               | 18.1              | 5.3               | 15.2              | 12.9              | 17.0              | 16.7              | 2.9               | 10.5              | 19.7              | 9.0               | 16.9              | 11.8              | 15.1              | 9.1               | 17.8              | 7.6               | 23.6              | 19.0              | 9.3               | 7.2               | 6.2               | 29.9              |                   |
| <700              | <653              | <680              | <591              | <601              | <1690             | <710              | <657              | <851              | 440               | <538              | <636              | <612              | <1961             | <520              | <680              | <788              | <732              | <762              | 338               | 346               | 274               | 900               | 295               | 224               | 187               | 487               | 790               |                   |
| 95.8              | 166               | 125               | 145               | 133               | 300               | 257               | 86.0              | 337               | 124               | 120               | 84.0              | 119               | 1115              | 91.5              | 1240              | 1100              | 920               | 1012              | 83.3              | 165               | 113               | 970               | 114               | 63.4              | 83.0              | 268               | 400               |                   |
| 0.77              | 10.9              | 9.2               | 16.1              | 7.3               | 33.0              | 55.0              | 6.7               | 31.8              | 6.8               | 8.5               | 4.0               | 4.0               | 62.0              | 3.7               | 123               | 31.0              | 30.4              | 290               | 2.2               | 4.3               | 4.1               | 22.1              | 5.7               | 1.9               | 2.3               | 6.4               | 18.7              |                   |
| <3.7              | 12.0              | 21.9              | 5.7               | <4.2              | 250               | 62.0              | 10.2              | 153               | 5.4               | 26.0              | <3.4              | 4.2               | 140               | <3.6              | 103               | 135               | 38.0              | 16.4              | 34.0              | 148               | 73.0              | 189               | 5000              | 31.0              | 29.0              | 380               | 42.0              |                   |
| er                | er                | 590               | 600               | 7.5               | 12700             | 15700             | 2400              | 7700              | 52.0              | 440               | 5.8               | 1150              | 11700             | 11.4              | 3380              | 1680              | 3930              | 9100              | 88.0              | 145               | 117               | 8200              | 64.0              | 8.9               | 129               | 1370              | 2240              |                   |
| er                | er                | 2800              | 1100              | <52.1             | 66000             | 11800             | 2800              | 47000             | <51.1             | 73.0              | <46.5             | 410               | 35300             | <58.3             | 290               | 1340              | 2610              | 1610              | 72.0              | 214               | 44.2              | 8200              | 172               | 186               | 430               | 1050              | 4700              |                   |
| <2.5              | <2.2              | 5.0               | <2.5              | <2.0              | <5.5              | 3.1               | 6.7               | 3.4               | <2.0              | <2.0              | <1.9              | <2.6              | 17.4              | <2.2              | <2.7              | <2.5              | 7.1               | 3.3               | <0.48             | <0.42             | <0.36             | 1.8               | 0.67              | <0.54             | <0.50             | 0.50              | 3.4               |                   |
| <133              | <152              | <126              | <161              | <151              | 720               | 290               | <185              | 330               | <129              | <127              | <126              | <124              | 3100              | <144              | 1690              | 920               | 910               | 870               | 104               | 370               | 180               | 3340              | 141               | 66.0              | 170               | 650               | 440               |                   |
| <45.8             | <46.6             | <43.2             | <41.6             | <37.8             | 620               | 740               | <46.3             | 383               | <33.1             | <46.7             | <40.2             | 65.0              | 392               | <49.5             | 168               | 108               | 218               | 227               | 15.2              | 23.4              | 23.0              | 99.0              | 21.0              | <8.2              | 8.5               | 33.6              | 90.0              |                   |
| <0.07             | er                | <0.001            | er                | <0.001            | 7.4               | 2.1               | <0.001            | 11.4              | <0.001            | <0.06             | <0.001            | 0.27              | 9.5               | <0.001            | 5.1               | 2.0               | 0.35              | 4.1               | 1.1               | 0.26              | 0.33              | 20.9              | 0.59              | 0.25              | 0.90              | 11.8              | 11.3              |                   |
| <0.78             | <0.89             | <0.92             | <0.70             | <0.84             | <2.1              | <0.89             | 1.0               | <0.88             | <0.66             | <0.90             | <0.77             | <0.96             | <2.0              | <0.85             | <0.84             | <1.0              | <1.1              | <1.1              | <0.13             | <0.15             | <0.14             | 0.57              | 0.11              | <0.16             | <0.16             | 0.19              | <0.94             |                   |
| <982              | <1095             | <933              | <1073             | <1082             | 16400             | 22500             | er                | 9500              | <696              | <1042             | <852              | 1360              | 12100             | <899              | <1060             | <1341             | 2900              | 7800              | 188               | <142              | <168              | 4900              | <154              | <186              | <215              | 1020              | 1830              |                   |
| <0.001            | er                | <0.001            | <0.001            | <0.001            | er                | <0.18             | <0.001            | 1.2               | <0.001            | <0.001            | <0.001            | <0.16             | 1.4               | <0.001            | <0.001            | <0.001            | <0.001            | 0.40              | 0.08              | 0.21              | er                | 2.9               | 0.19              | er                | er                | 0.37              | 1.1               |                   |
| 0.21              | 0.40              | 0.22              | 0.56              | 0.16              | 2.7               | 0.86              | er                | 7.0               | 0.38              | 0.54              | 0.22              | <0.17             | 2.0               | 0.66              | 25.6              | 0.47              | 0.75              | 12.5              | 0.43              | 0.29              | 0.17              | 3.8               | 1.5               | 0.28              | 0.35              | 0.39              | 0.47              |                   |
| 380               | 443               | 448               | 425               | 423               | 381               | 429               | 464               | 439               | 500               | 435               | 395               | 347               | 401               | 449               | 464               | 446               | 432               | 425               | 350               | 402               | 354               | 441               | 383               | 377               | 350               | 348               | 420               |                   |
| <0.15             | 0.44              | <0.15             | <0.21             | <0.17             | 1.9               | 1.5               | <0.28             | 1.8               | 0.24              | <0.20             | 0.15              | 1.6               | 1.9               | <0.25             | 0.55              | 0.87              | 1.5               | 0.68              | 0.10              | 0.16              | 0.09              | 0.46              | 5.9               | <0.03             | 0.05              | 0.13              | 0.50              |                   |
| <0.001            | <0.001            | <0.001            | <0.001            | <0.001            | <0.001            | er                | <0.001            | er                | <0.09             | <0.001            | <0.001            | <0.001            | <0.001            | <0.001            | er                | <0.001            | <0.001            | 0.65              | <0.001            | er                | <0.001            | 0.18              | 0.11              | 0.04              | <0.001            | er                | <0.001            |                   |
| <0.001            | <0.001            | <0.001            | <0.001            | <0.001            | <0.08             | er                | <0.001            | 0.21              | <0.001            | er                | er                | <0.001            | 0.26              | <0.001            | 0.39              | 0.06              | <0.001            | 0.15              | 0.04              | 0.02              | 0.01              | 0.32              | 0.02              | <0.001            | <0.001            | 0.47              | 0.10              |                   |
| 35.9              | 33.4              | 11.2              | 66.0              | 0.14              | 137               | 124               | 213               | 47.0              | 89.0              | 13.8              | 0.42              | 450               | 135               | 26.9              | 122               | 47.7              | 117               | 122               | 327               | 255               | 22.3              | 681               | 205               | 20.4              | 304               | 235               | 1180              |                   |
| 0.31              | 2.0               | 1.4               | 8.7               | 0.34              | 5.1               | 7.2               | 2.2               | 7.0               | 1.9               | 2.5               | 0.24              | 1.9               | 6.3               | 3.0               | 6.8               | 12.4              | 6.7               | 7.5               | 17.9              | 12.0              | 5.9               | 19.4              | 35.0              | 2.5               | 7.9               | 13.9              | 31.3              |                   |
| 4.4               | 12.0              | 7.1               | 10.8              | 5.5               | 27.6              | 22.2              | 17.7              | 18.0              | 15.8              | 9.0               | 3.4               | 45.4              | 29.8              | 7.6               | 23.2              | 22.6              | 27.9              | 25.6              | 35.8              | 26.6              | 4.8               | 72.3              | 31.3              | 3.7               | 25.8              | 26.2              | 153               |                   |

| RX6710<br>Mx-Stby |
|-------------------|-------------------|-------------------|-------------------|-------------------|-------------------|-------------------|-------------------|-------------------|-------------------|-------------------|-------------------|-------------------|-------------------|-------------------|-------------------|-------------------|-------------------|-------------------|-------------------|-------------------|-------------------|-------------------|-------------------|-------------------|-------------------|
| 1_66              | 1_67              | 1_68              | 1_70              | 1_71              | 1_72              | 1_84              | 1_85              | 1_86              | 1_87              | 1_90              | 1_91              | 1_92              | 1_93              | 1_96              | 1_97              | 1_98              | 1_1               | 1_3               | 1_73              | 1_82              | 1_83              | 1_74              | 1_75              | 1_76              | 1_77              |
| 173300            | 191000            | 169600            | 163400            | 184900            | 166000            | 199000            | 192700            | 189700            | 183300            | 162000            | 172500            | 160700            | 139700            | 168700            | 166400            | 189500            | 175400            | 173400            | 172500            | 163800            | 168400            | 170700            | 197200            | 165800            | 173400            |
| 31800             | 32300             | 33960             | 33350             | 32400             | 33300             | 32600             | 34200             | 34600             | 34000             | 30100             | 29380             | 30100             | 33780             | 34760             | 34440             | 32070             | 35570             | 31490             | 34100             | 33620             | 32400             | 32600             | 30800             | 33300             | 32700             |
| 83600             | 89400             | 101400            | 99500             | 90300             | 100900            | 98000             | 97600             | 98400             | 95600             | 87100             | 78000             | 88000             | 105500            | 103100            | 104700            | 90600             | 104500            | 88500             | 96500             | 97600             | 89400             | 89800             | 82000             | 98400             | 93100             |
| 6140              | 7780              | 10100             | 10190             | 6900              | 9550              | 7540              | 8600              | 8160              | 8500              | 7390              | 5780              | 7660              | 9930              | 9690              | 10930             | 7970              | 9960              | 7430              | 8420              | 8660              | 7580              | 7520              | 5520              | 8510              | 7790              |
| 1750              | 2320              | 3170              | 3240              | 1870              | 2950              | 1930              | 2610              | 2590              | 2710              | 2190              | 1549              | 2400              | 2507              | 2890              | 3540              | 2493              | 3000              | 2157              | 2455              | 2610              | 2180              | 2217              | 1456              | 2480              | 2270              |
| 1830              | 2880              | 4390              | 4350              | 2190              | 3870              | 2140              | 3050              | 3020              | 2980              | 2590              | 1654              | 2620              | 4340              | 3890              | 4430              | 3030              | 3930              | 2580              | 2868              | 3000              | 2640              | 2546              | 1470              | 2890              | 2520              |
| 134               | 221               | 392               | 427               | 183               | 337               | 178               | 241               | 259               | 234               | 215               | 114               | 218               | 427               | 336               | 427               | 284               | 326               | 229               | 245               | 270               | 223               | 211               | 93.2              | 253               | 236               |
| 520               | 940               | 1565              | 1768              | 680               | 1360              | 720               | 950               | 1060              | 960               | 880               | 465               | 899               | 1898              | 1450              | 1863              | 1237              | 1310              | 946               | 972               | 1075              | 925               | 869               | 278               | 1046              | 860               |
| 1110              | 2370              | 4630              | 4940              | 1860              | 3670              | 1370              | 2440              | 2980              | 2180              | 2260              | 1000              | 2100              | 6440              | 3980              | 5150              | 3350              | 3640              | 2740              | 2378              | 2790              | 2620              | 2120              | 664               | 2570              | 2140              |
| 68.0              | 124               | 223               | 246               | 91.0              | 191               | 77.0              | 120               | 147               | 110               | 119               | 48.0              | 120               | 274               | 192               | 263               | 164               | 173               | 127               | 129               | 150               | 129               | 116               | 29.0              | 140               | 112               |
| 129               | 235               | 440               | 502               | 154               | 358               | 101               | 219               | 294               | 203               | 246               | 88.0              | 234               | 544               | 363               | 531               | 349               | 338               | 236               | 259               | 301               | 278               | 216               | 44.4              | 282               | 224               |
| 11.1              | 19.7              | 37.2              | 47.1              | 17.1              | 36.3              | 12.9              | 19.5              | 25.2              | 14.9              | 22.8              | 8.2               | 21.5              | 50.3              | 29.4              | 49.4              | 30.8              | 25.3              | 17.3              | 22.2              | 28.0              | 32.1              | 19.5              | 3.0               | 23.0              | 21.7              |
| 52.0              | 96.0              | 187               | 222               | 68.0              | 145               | 40.6              | 91.0              | 121               | 69.0              | 109               | 41.7              | 102               | 222               | 130               | 228               | 142               | 142               | 79.8              | 103               | 125               | 230               | 83.8              | 13.9              | 112               | 109               |
| 4.2               | 9.3               | 19.2              | 22.7              | 6.9               | 15.9              | 3.7               | 8.6               | 12.3              | 7.5               | 11.2              | 3.2               | 11.4              | 25.2              | 14.2              | 24.0              | 14.1              | 13.1              | 7.3               | 10.7              | 13.9              | 20.5              | 8.7               | 1.0               | 10.7              | 11.3              |
| <607              | <466              | 1340              | <895              | <692              | <582              | <677              | 1100              | 1490              | er                | <595              | <676              | 1150              | 2900              | 2550              | 2260              | 3100              | 880               | <1909             | 620               | 550               | 377               | 260               | 158               | 422               | 337               |
| 71.1              | 105               | 1480              | 419               | 89.3              | 349               | 256               | 350               | 1790              | 229               | 296               | 930               | 266               | 402               | 3200              | 3610              | 6500              | 860               | 3740              | 893               | 742               | 192               | 90.5              | 62.3              | 302               | 356               |
| 1.2               | 1.6               | 39.7              | 24.1              | 2.3               | 10.8              | 4.7               | 12.8              | 53.0              | 31.0              | 18.3              | 1180              | 9.2               | 11.2              | 78.0              | 104               | 225               | 58.0              | 401               | 51.0              | 82.0              | 16.0              | 3.5               | 0.67              | 16.4              | 13.6              |
| 14800             | 74.0              | 77.0              | 340               | <4.5              | 127               | 66.0              | 15.0              | 460               | 200               | 370               | 500               | 820               | 700               | 480               | 820               | 7200              | 182               | 740               | 221               | 551               | 190               | 7.0               | 0.82              | 740               | 74.0              |
| 28.0              | 9.4               | 7300              | 2840              | 930               | 980               | 420               | 1640              | 11500             | 43000             | 1490              | 3550              | 3100              | 7500              | 15500             | 12800             | 60300             | 7600              | 51900             | 7400              | 3210              | 417               | 880               | 0.60              | 800               | 722               |
| 280               | 530               | 8400              | 14000             | 1650              | 260               | er                | 590               | 58000             | 23000             | 303               | 1890              | 73000             | 23700             | 10700             | 6100              | 75000             | 46000             | 62800             | 3410              | 40500             | 1640              | 2200              | <8.8              | 650               | 760               |
| <2.4              | <2.2              | 4.9               | <3.3              | 5.0               | <2.5              | <2.4              | <2.8              | 14.5              | 26.0              | <2.5              | <2.0              | <2.7              | 24.6              | 8.6               | 4.1               | 126               | 3.7               | 26.7              | 2.4               | 1.5               | 3.0               | 2.6               | <0.44             | 0.52              | <0.50             |
| <145              | <140              | 5500              | 1030              | <149              | 1270              | 370               | 370               | 5200              | er                | 320               | 1570              | 600               | <159              | 10600             | 10200             | 31400             | 2600              | 10500             | 983               | 1410              | 169               | 53.0              | 52.0              | 330               | 379               |
| <39.1             | <40.0             | 60.0              | 76.0              | <41.8             | <40.0             | 57.0              | 165               | 290               | 750               | 52.0              | 128               | 125               | 330               | 210               | 222               | 800               | 280               | 2910              | 123               | 125               | 49.0              | <8.3              | <7.8              | 43.2              | 36.5              |
| <0.001            | 0.47              | 24.3              | 23.9              | er                | <0.06             | er                | 0.34              | 74.0              | 2.0               | 2.1               | 64.0              | 88.0              | 14.0              | 16.5              | 31.0              | 8.0               | 56.0              | 121               | 9.2               | 14.8              | 15.8              | 0.97              | er                | 1.0               | 1.5               |
| <0.71             | <0.73             | <0.93             | <0.94             | <0.91             | <0.91             | <0.68             | <0.86             | 1.6               | <1.0              | <0.87             | <0.85             | <1.0              | <0.79             | <1.1              | <1.0              | <2.6              | <1.3              | <2.4              | 0.46              | 0.37              | 4.2               | <0.15             | <0.16             | <0.18             | <0.15             |
| <981              | <808              | 1670              | 2800              | <958              | <904              | <1000             | 1970              | 5500              | 64000             | 1470              | 1860              | 1580              | 7800              | 3000              | 2500              | 39600             | 6400              | 57000             | 7000              | 1840              | 820               | 640               | <164              | 600               | 1010              |
| <0.001            | 0.28              | 5.6               | 1.5               | <0.001            | er                | 0.32              | <0.001            | 0.75              | 0.23              | <0.001            | 0.35              | 0.84              | 1.4               | 2.9               | 1.5               | er                | 2.9               | 4.8               | 1.0               | 2.1               | 1.0               | 0.09              | <0.001            | 0.09              | 0.19              |
| <0.11             | er                | 0.32              | 1.3               | 0.11              | 0.15              | 0.55              | <0.13             | 0.76              | er                | <0.16             | 0.27              | 1.7               | 1.5               | 1.6               | 1.2               | 3.1               | 2.5               | 60.0              | 0.75              | 0.48              | 1220              | 0.66              | 0.17              | 11.1              | 0.36              |
| 326               | 428               | 444               | 399               | 334               | 409               | 341               | 370               | 418               | 379               | 352               | 310               | 410               | 396               | 479               | 482               | 535               | 436               | 423               | 390               | 399               | 350               | 332               | 319               | 368               | 366               |
| 4.3               | 0.32              | 0.55              | 0.78              | 0.36              | 0.33              | 0.56              | 0.63              | 2.1               | er                | 1.5               | 0.67              | 8.2               | 1.1               | 0.77              | 13.8              | 16.2              | 1.9               | 6.4               | 0.56              | 1.2               | 0.65              | 0.07              | 0.05              | 0.17              | 0.17              |
| <0.001            | <0.001            | <0.001            | er                | <0.001            | <0.001            | <0.001            | <0.001            | <0.001            | <0.001            | <0.001            | er                | <0.12             | <0.001            | er                | <0.43             | <0.001            | 1.1               | <0.001            | <0.001            | 39.0              | 0.05              | er                | 0.51              | er                |                   |
| <0.001            | <0.001            | 0.37              | 0.62              | <0.001            | er                | er                | <0.001            | 0.98              | 0.05              | er                | 1.5               | 0.79              | 0.10              | 0.91              | 0.87              | 0.13              | 1.1               | 2.9               | 0.30              | 0.33              | 0.31              | er                | <0.001            | 0.03              | 0.04              |
| 11.8              | 206               | 645               | 738               | 110               | 297               | 454               | 205               | 417               | 154               | 310               | 124               | 186               | 4960              | 2070              | 728               | 481               | 1730              | 788               | 127               | 110               | 157               | 30.6              | 17.4              | 61.0              | 54.0              |
| 2.6               | 9.7               | 13.6              | 38.9              | 5.9               | 19.3              | 11.1              | 1.9               | 6.0               | 2.7               | 5.0               | 2.7               | 10.4              | 86.0              | 26.4              | 13.1              | 7.0               | 13.8              | 24.6              | 31.4              | 10.0              | 101               | 20.8              | 0.07              | 18.7              | 1.1               |
| 15.5              | 22.5              | 78.5              | 99.5              | 12.7              | 32.9              | 66.3              | 35.5              | 76.0              | 29.3              | 34.2              | 31.2              | 49.0              | 606               | 275               | 131               | 112               | 201               | 127               | 24.0              | 24.5              | 19.9              | 6.4               | 1.8               | 14.9              | 10.1              |

| RX6710<br>Mx-Stby | RX6710<br>Mx-Stby | RX6710<br>Mx-Stby | RX6710<br>Mx-Stby | RX6709<br>Mx-Stby | RX6728<br>Mx-Stby |
|-------------------|-------------------|-------------------|-------------------|-------------------|-------------------|-------------------|-------------------|-------------------|-------------------|-------------------|-------------------|-------------------|-------------------|-------------------|-------------------|-------------------|-------------------|-------------------|-------------------|-------------------|-------------------|-------------------|-------------------|-------------------|-------------------|
| 1_78              | 1_79              | 1_80              | 1_81              | 1_6               | 1_7               | 1_8               | 1_9               | 1_10              | 1_11              | 1_193             | 1_203             | 1_204             | 1_205             | 1_206             | 1_207             | 1_208             | 1_209             | 1_210             | 1_211             | 1_194             | 1_212             | 1_195             | 1_196             | 1_197             | 1_198             |
| 165500            | 174100            | 158700            | 175800            | 187900            | 187400            | 182900            | 189100            | 187500            | 189600            | 160100            | 180300            | 179700            | 176700            | 172000            | 173000            | 195900            | 173000            | 175100            | 178300            | 177800            | 169000            | 213000            | 166700            | 170000            | 187000            |
| 32100             | 34300             | 33550             | 31670             | 36380             | 36960             | 36680             | 39020             | 36260             | 36540             | 33600             | 33400             | 34700             | 33500             | 32400             | 33800             | 34100             | 37300             | 33600             | 36000             | 33000             | 32600             | 34800             | 35900             | 31900             | 35300             |
| 88300             | 95700             | 99890             | 84700             | 103700            | 106300            | 109200            | 113100            | 105600            | 103400            | 100500            | 94800             | 93400             | 98500             | 92100             | 98500             | 88900             | 104200            | 95600             | 99810             | 88800             | 94200             | 105000            | 107000            | 83600             | 102500            |
| 7760              | 8200              | 9510              | 6520              | 9100              | 9900              | 9920              | 10290             | 9380              | 8780              | 9520              | 7950              | 8490              | 8460              | 7990              | 9270              | 7020              | 9590              | 9110              | 9170              | 7600              | 8930              | 9290              | 10070             | 6950              | 9090              |
| 2350              | 2350              | 2980              | 1800              | 2679              | 2979              | 3030              | 3074              | 2814              | 2640              | 3220              | 2380              | 2510              | 2530              | 2440              | 2810              | 1810              | 2970              | 2990              | 2760              | 2140              | 2990              | 2860              | 2980              | 1970              | 2750              |
| 2750              | 2700              | 3550              | 1970              | 2972              | 3305              | 3430              | 3545              | 3064              | 2805              | 3930              | 2690              | 2850              | 2950              | 2930              | 3250              | 1820              | 3670              | 3490              | 3440              | 2350              | 3980              | 3190              | 3620              | 2040              | 3110              |
| 240               | 216               | 322               | 153               | 261               | 298               | 305               | 328               | 269               | 247               | 360               | 200               | 223               | 257               | 258               | 284               | 114               | 303               | 304               | 312               | 187               | 305               | 272               | 273               | 148               | 254               |
| 970               | 850               | 1322              | 586               | 1057              | 1204              | 1307              | 1389              | 1145              | 1005              | 1520              | 690               | 719               | 982               | 1020              | 1131              | 342               | 1240              | 1210              | 1270              | 720               | 1190              | 1040              | 1220              | 521               | 970               |
| 2560              | 2150              | 3270              | 1440              | 2700              | 3081              | 3380              | 3730              | 2801              | 2682              | 4050              | 1760              | 1850              | 2540              | 3070              | 2840              | 739               | 2900              | 2910              | 3150              | 1910              | 3120              | 2450              | 2880              | 1180              | 2400              |
| 135               | 114               | 180               | 72.1              | 145               | 165               | 177               | 192               | 155               | 140               | 197               | 80.9              | 93.0              | 131               | 149               | 148               | 34.0              | 153               | 167               | 165               | 92.0              | 173               | 131               | 158               | 65.0              | 142               |
| 261               | 221               | 342               | 144               | 293               | 327               | 370               | 373               | 308               | 305               | 394               | 137               | 148               | 242               | 292               | 309               | 50.6              | 283               | 347               | 265               | 167               | 357               | 245               | 300               | 126               | 253               |
| 23.2              | 21.0              | 29.6              | 12.2              | 27.0              | 30.8              | 33.8              | 31.6              | 28.5              | 31.2              | 32.4              | 12.8              | 13.1              | 20.7              | 28.9              | 24.5              | 3.8               | 22.7              | 29.4              | 19.8              | 13.6              | 33.1              | 21.9              | 29.0              | 9.8               | 22.5              |
| 99.0              | 109               | 130               | 57.1              | 123               | 144               | 161               | 130               | 134               | 163               | 142               | 44.2              | 56.0              | 91.1              | 136               | 110               | 13.0              | 100               | 143               | 82.4              | 64.0              | 153               | 89.0              | 130               | 47.1              | 119               |
| 10.8              | 11.2              | 13.2              | 5.6               | 12.3              | 14.7              | 16.2              | 12.6              | 13.3              | 18.6              | 15.3              | 4.1               | 4.2               | 9.9               | 14.3              | 10.6              | 1.1               | 10.5              | 14.8              | 7.6               | 7.2               | 15.2              | 8.6               | 14.1              | 4.9               | 11.2              |
| 310               | 510               | 910               | 459               | 421               | 294               | 206               | 389               | 500               | 639               | <537              | <642              | <570              | <812              | <801              | <741              | <734              | <742              | <661              | <924              | <681              | 1220              | <805              | <685              | <808              | <779              |
| 210               | 760               | 733               | 392               | 890               | 308               | 413               | 920               | 492               | 1433              | 184               | 177               | 155               | 104               | 137               | 130               | 65.4              | 162               | 116               | 118               | 108               | 119               | 135               | 120               | 110               | 73.9              |
| er                | 33.1              | 32.4              | 27.7              | 290               | 16.8              | 71.0              | 35.4              | 560               | 590               | 8.9               | 4.2               | 2.9               | 1.6               | 17.3              | 5.0               | er                | 4.5               | 5.2               | 6.4               | 4.2               | 3.7               | 3.0               | 3.7               | 3.2               | 1.0               |
| 500               | 26.7              | 470               | 18.8              | 253               | 5.5               | 1430              | 230               | 24.7              | 2480              | 248               | <5.4              | <4.0              | 12.1              | 191               | 19.0              | <3.6              | 30.0              | 24.7              | 39.0              | 116               | 104               | 421               | 50.0              | 266               | <4.7              |
| 430               | 1450              | 1550              | 970               | 4070              | 1500              | 1690              | 7010              | 1020              | 3210              | 6.3               | 8.1               | 5.9               | 46.0              | 760               | 47.0              | <4.2              | 12.4              | 12.4              | 2200              | 12.0              | 9.4               | 5.7               | 8.8               | 320               | 6.2               |
| 232               | 770               | 1050              | 431               | 1450              | 213               | 241               | 4780              | 480               | 923               | <45.4             | 1450              | <47.0             | 14100             | 3050              | er                | <54.3             | er                | 350               | 28100             | 1320              | 67.0              | <70.8             | er                | 6500              | <63.4             |
| <0.38             | <0.38             | 1.2               | <0.43             | na                | na                | na                | na                | na                | na                | <2.1              | <2.8              | <2.8              | <3.0              | 6.5               | <3.2              | <3.0              | <3.1              | <3.0              | 7.3               | <2.3              | <2.4              | <3.2              | <3.3              | <3.0              | <2.9              |
| 270               | 910               | 768               | 473               | 1175              | 362               | 387               | 1820              | 451               | 1480              | 190               | <202              | <160              | <201              | 200               | 310               | <146              | <165              | <204              | <239              | 550               | <211              | <257              | <150              | 250               | <175              |
| 27.0              | 84.0              | 67.9              | 53.9              | 72.3              | 47.5              | 47.2              | 122               | 63.1              | 161               | <48.4             | <62.8             | <54.6             | <59.5             | 71.0              | <66.6             | <58.8             | <55.3             | <61.5             | <78.0             | <55.6             | <38.8             | <66.5             | <66.7             | <52.2             | <61.8             |
| 0.47              | 1.1               | 17.0              | 2.4               | na                | na                | na                | na                | na                | na                | <0.001            | er                | <0.001            | 0.89              | <0.001            | er                | <0.001            | er                | <0.001            | 0.95              | <0.001            | <0.08             | <0.001            | <0.09             | 0.49              | <0.001            |
| <0.14             | 0.31              | 0.95              | 0.12              | na                | na                | na                | na                | na                | na                | <0.89             | <1.3              | <0.82             | <1.1              | <0.90             | <1.1              | <1.0              | <1.0              | <0.99             | <1.1              | <0.91             | <0.97             | <0.90             | <0.84             | <0.97             | <1.2              |
| 147               | 310               | 304               | 370               | 1760              | 1120              | 980               | 3750              | 215               | 810               | <837              | <1281             | <1043             | <1070             | <1078             | <1639             | <1039             | <1305             | <1386             | 2800              | <1203             | <993              | <1078             | <1168             | <1113             | <1079             |
| er                | 0.23              | 1.7               | 0.36              | 0.12              | 0.14              | 0.05              | 0.05              | 0.18              | 0.43              | <0.001            | <0.001            | <0.001            | 0.51              | <0.001            | er                | <0.001            | er                | <0.001            | 0.48              | <0.001            | <0.001            | <0.001            | er                | er                | er                |
| 0.24              | 0.35              | 2.1               | 0.59              | na                | na                | na                | na                | na                | na                | er                | <0.17             | er                | 0.31              | <0.20             | er                | 0.22              | <0.21             | 3.0               | er                | 0.24              | er                | <0.001            | 0.15              | er                | <0.001            |
| 364               | 378               | 410               | 333               | na                | na                | na                | na                | na                | na                | 366               | 350               | 344               | 353               | 325               | 378               | 324               | 410               | 380               | 367               | 318               | 371               | 411               | 409               | 305               | 344               |
| 0.92              | 0.29              | 1.1               | 0.40              | 2.4               | 0.37              | 0.18              | 0.97              | 0.44              | 10.0              | 0.18              | <0.20             | <0.17             | er                | er                | 1.2               | <0.29             | 0.42              | <0.28             | 3.0               | 0.40              | <0.24             | <0.28             | <0.27             | 2.5               | 0.20              |
| er                | <0.02             | 0.15              | 0.06              | na                | na                | na                | na                | na                | na                | <0.001            | <0.001            | <0.001            | <0.001            | <0.001            | <0.001            | <0.001            | er                | er                | <0.17             | <0.001            | <0.001            | <0.001            | <0.001            | <0.001            | <0.001            |
| er                | 0.02              | 0.82              | 0.07              | na                | na                | na                | na                | na                | na                | <0.001            | <0.001            | <0.04             | <0.001            | <0.001            | <0.001            | <0.001            | <0.04             | <0.001            | <0.001            | <0.001            | <0.04             | <0.001            | <0.001            | <0.001            | <0.001            |
| 39.5              | 157               | 279               | 79.0              | 36.6              | 136               | 23.1              | 112               | 26.7              | 83.0              | 128               | 11.7              | 3.5               | 49.0              | 302               | 36.0              | 128               | 49.0              | 42.1              | 134               | 60.0              | 23.4              | 19.5              | 14.0              | 43.9              | 48.0              |
| 16.5              | 7.1               | 33.3              | 8.7               | 5.4               | 3.8               | 6.0               | 8.7               | 9.1               | 87.0              | 7.1               | 2.0               | 0.49              | 5.9               | 7.8               | 2.9               | 0.23              | 6.2               | 5.3               | 18.9              | 3.0               | 3.5               | 1.8               | 0.29              | 3.3               | 4.4               |
| 13.5              | 21.0              | 38.9              | 13.6              | 15.7              | 16.7              | 8.1               | 16.8              | 9.2               | 33.8              | 25.2              | 3.3               | 2.0               | 12.0              | 45.2              | 11.1              | 13.7              | 9.9               | 9.4               | 21.1              | 9.0               | 5.6               | 6.1               | 6.0               | 11.0              | 8.9               |

| RX6728<br>Mx-Stby |
|-------------------|-------------------|-------------------|-------------------|-------------------|-------------------|-------------------|-------------------|-------------------|-------------------|-------------------|-------------------|-------------------|-------------------|-------------------|-------------------|-------------------|-------------------|-------------------|-------------------|-------------------|-------------------|-------------------|-------------------|-------------------|-------------------|
| 1_199             | 1_200             | 1_201             | 1_226             | 1_227             | 1_228             | 1_229             | 1_230             | 1_232             | 1_241             | 1_242             | 1_245             | 1_233             | 1_234             | 1_235             | 1_236             | 1_237             | 1_238             | 1_239             | 1_240             | 1_213             | 1_222             | 1_223             | 1_225             | 1_214             | 1_215             |
| 205000            | 178000            | 165000            | 170300            | 174200            | 171200            | 163000            | 171600            | 169900            | 160000            | 170600            | 169000            | 174000            | 167000            | 152000            | 173000            | 171100            | 171600            | 171000            | 168000            | 182000            | 174000            | 177900            | 171600            | 173000            | 175500            |
| 34400             | 34200             | 36500             | 34900             | 33600             | 36700             | 35700             | 38070             | 38600             | 35500             | 39100             | 36800             | 36760             | 30700             | 37700             | 34100             | 34700             | 35360             | 39600             | 36900             | 34100             | 37800             | 35000             | 35380             | 33500             | 34820             |
| 90200             | 98300             | 112000            | 104300            | 101300            | 109200            | 94200             | 123200            | 108300            | 103000            | 105300            | 111500            | 114800            | 93900             | 103500            | 101000            | 112000            | 100100            | 117700            | 112600            | 102500            | 104000            | 102700            | 103300            | 102000            | 103100            |
| 7570              | 9400              | 13220             | 10430             | 9230              | 10770             | 9300              | 12540             | 11130             | 11340             | 10360             | 12370             | 12820             | 8260              | 11670             | 8850              | 9230              | 9370              | 13100             | 11450             | 9990              | 9390              | 9300              | 9380              | 9370              | 10300             |
| 2290              | 3210              | 4820              | 3530              | 2710              | 3560              | 2940              | 3990              | 3640              | 3810              | 3360              | 4090              | 4290              | 2330              | 3770              | 2870              | 2870              | 2900              | 4130              | 3970              | 3300              | 3100              | 2850              | 3080              | 2920              | 3060              |
| 2420              | 3770              | 5720              | 4150              | 3060              | 3770              | 3760              | 5010              | 4880              | 4500              | 4320              | 5170              | 5130              | 2370              | 4590              | 3200              | 3650              | 3330              | 5030              | 5000              | 3590              | 3410              | 3390              | 3580              | 3320              | 3710              |
| 189               | 351               | 561               | 407               | 251               | 320               | 313               | 468               | 450               | 414               | 392               | 489               | 485               | 192               | 474               | 298               | 327               | 304               | 498               | 491               | 304               | 317               | 287               | 313               | 291               | 367               |
| 691               | 1430              | 2340              | 1510              | 990               | 1280              | 1310              | 2040              | 1860              | 1710              | 1680              | 2290              | 2016              | 620               | 1900              | 1150              | 1250              | 1220              | 2160              | 2140              | 1069              | 1220              | 1170              | 1260              | 1200              | 1480              |
| 1850              | 3480              | 5760              | 3980              | 2760              | 2820              | 2900              | 5070              | 4440              | 4150              | 4750              | 5630              | 5200              | 1830              | 5090              | 2830              | 3160              | 2820              | 4990              | 5600              | 2840              | 2690              | 2960              | 2990              | 3050              | 4020              |
| 88.0              | 174               | 324               | 248               | 163               | 168               | 175               | 287               | 257               | 270               | 224               | 297               | 287               | 85.0              | 298               | 139               | 152               | 187               | 308               | 300               | 169               | 150               | 192               | 170               | 155               | 201               |
| 209               | 294               | 682               | 441               | 267               | 319               | 363               | 579               | 505               | 471               | 400               | 634               | 569               | 206               | 604               | 278               | 262               | 340               | 532               | 530               | 236               | 319               | 311               | 337               | 355               | 371               |
| 17.3              | 14.9              | 66.0              | 40.9              | 24.7              | 29.2              | 31.8              | 57.5              | 53.5              | 48.9              | 32.4              | 59.1              | 55.2              | 18.6              | 58.8              | 24.9              | 21.7              | 32.2              | 37.7              | 29.7              | 19.9              | 27.6              | 26.7              | 29.2              | 30.0              | 30.1              |
| 80.0              | 45.2              | 322               | 211               | 123               | 125               | 142               | 250               | 197               | 194               | 155               | 295               | 252               | 85.0              | 286               | 108               | 85.1              | 149               | 139               | 113               | 96.0              | 153               | 109               | 128               | 135               | 133               |
| 8.5               | 4.5               | 34.9              | 21.9              | 11.4              | 13.0              | 14.4              | 29.3              | 23.3              | 21.1              | 15.9              | 31.3              | 27.7              | 7.0               | 29.2              | 11.8              | 8.5               | 14.9              | 13.3              | 8.2               | 10.1              | 14.5              | 11.5              | 14.5              | 15.0              | 13.9              |
| <815              | 2900              | <1017             | 860               | <745              | <815              | <548              | <803              | <701              | <544              | 1360              | <949              | <882              | <786              | <716              | <639              | <781              | <642              | <1098             | <813              | <814              | <867              | <788              | <1011             | <674              | 1400              |
| 97.6              | 246               | 176               | 153               | 136               | 27.1              | 101               | 68.0              | 176               | 117               | 173               | 97.7              | 117               | 94.0              | 172               | 166               | 130               | 77.0              | 117               | 134               | 65.8              | 103               | 110               | 116               | 190               |                   |
| 2.1               | 92.0              | 7.4               | 6.2               | 5.9               | 2.5               | 4.0               | 7000              | 4.3               | 5.0               | 16.5              | 3.1               | 6.0               | 4.1               | 4.3               | 2.4               | 11.6              | 8.7               | 1.5               | 4.7               | 1.9               | 0.85              | 3.6               | 3.2               | 4.8               | 10.4              |
| 531               | 14400             | <4.0              | 75.0              | 402               | 636               | 184               | <4.1              | 8.7               | 100               | 560               | 6.1               | 13.4              | 438               | 119               | 12.6              | 111               | 264               | 127               | 36.0              | <4.6              | 6.3               | <5.0              | <5.0              | 34.0              | 17.0              |
| <5.1              | 40000             | 24.6              | 37.0              | 5.2               | 8.7               | 12.5              | 14.2              | 17.8              | 12.3              | 460               | 11.1              | 1480              | 4.9               | 180               | 7.9               | 6.9               | 16.4              | 6.0               | 17.4              | <5.8              | 4.8               | 24.1              | 25.8              | 12.8              | 155               |
| <78.9             | 2100              | <63.1             | 7700              | <64.8             | <69.6             | <59.9             | 300               | <52.4             | <54.3             | 10600             | <75.4             | 4700              | <50.4             | <44.8             | <59.5             | <67.7             | <53.7             | <72.1             | 2800              | <55.6             | 96.0              | 2090              | 5300              | <58.5             | 50000             |
| <2.9              | er                | <3.3              | <3.5              | <2.8              | <3.8              | <2.4              | <2.8              | <2.6              | <2.7              | 11.0              | <3.3              | 13.5              | <2.1              | <2.8              | <2.7              | <3.2              | <3.3              | <3.5              | <3.3              | <3.2              | <3.1              | <3.5              | <3.1              | <2.6              | er                |
| 520               | <197              | <200              | 270               | 240               | <197              | <145              | <180              | <163              | <154              | 450               | <217              | <223              | 390               | <162              | <173              | 370               | 330               | <205              | <227              | <199              | <178              | <198              | <234              | <155              | 520               |
| <67.6             | 1360              | <56.2             | <67.2             | <71.2             | <62.5             | <60.7             | <64.5             | <53.5             | <60.1             | 161               | <75.7             | <70.9             | 49.0              | <57.0             | <66.7             | <66.5             | <59.0             | <69.9             | 120               | <68.7             | <69.1             | <63.5             | <77.2             | <59.4             | <85.4             |
| er                | er                | <0.001            | 0.25              | <0.001            | <0.001            | <0.08             | <0.09             | <0.001            | <0.001            | 9.5               | <0.10             | <0.001            | er                | <0.08             | er                | er                | <0.08             | <0.001            | <0.11             | <0.09             | <0.09             | er                | 0.33              | <0.001            | 2.2               |
| <1.1              | er                | <1.1              | <1.0              | <0.88             | <0.86             | <0.91             | <1.2              | <0.98             | <0.87             | <1.5              | <1.4              | <1.4              | <0.89             | <0.98             | <1.0              | <1.1              | <0.94             | <1.0              | <1.1              | <1.3              | <0.89             | <1.6              | <1.4              | <1.0              | <1.3              |
| <1094             | 56000             | <1122             | <1591             | <1267             | <1508             | <1179             | <1156             | <948              | <990              | <1808             | <1282             | 2500              | <929              | <1026             | <1099             | <1221             | <1293             | <1436             | <1207             | <1049             | <1227             | <1324             | <1271             | <1144             | <1656             |
| <0.001            | er                | <0.42             | er                | <0.001            | <0.001            | <0.001            | <0.21             | <0.18             | <0.001            | 5.3               | <0.001            | <0.001            | <0.17             | <0.18             | <0.001            | <0.19             | <0.001            | <0.21             | 4.2               | <0.001            | <0.001            | <0.001            | er                | <0.001            | 0.91              |
| <0.001            | 0.19              | <0.001            | <0.16             | 0.22              | er                | 0.09              | <0.16             | 0.15              | <0.22             | 13.3              | 0.12              | 0.14              | er                | <0.001            | <0.20             | er                | er                | er                | er                | 0.20              | <0.15             | 0.16              | er                | 0.25              | <0.57             |
| 329               | 346               | 427               | 377               | 358               | 421               | 345               | 465               | 395               | 434               | 426               | 408               | 426               | 296               | 453               | 368               | 390               | 427               | 465               | 422               | 376               | 367               | 364               | 372               | 408               | 386               |
| 0.30              | 0.44              | <0.27             | 1.1               | <0.33             | 0.33              | <0.29             | 0.33              | 0.62              | 0.16              | 4.0               | 0.28              | 0.67              | <0.30             | <0.25             | 0.24              | <0.28             | <0.17             | <0.26             | <0.29             | 0.26              | <0.19             | 0.34              | 1.5               | <0.19             | 2.7               |
| <0.001            | <0.001            | <0.001            | <0.001            | <0.001            | <0.001            | <0.001            | <0.15             | <0.001            | er                | er                | <0.001            | <0.001            | <0.001            | <0.001            | <0.001            | <0.001            | <0.001            | <0.001            | <0.001            | <0.001            | <0.001            | <0.001            | <0.001            | <0.001            |                   |
| <0.001            | <0.001            | <0.001            | <0.001            | <0.001            | <0.001            | <0.001            | <0.001            | <0.04             | <0.05             | er                | <0.001            | <0.001            | <0.001            | <0.001            | <0.001            | <0.001            | <0.001            | <0.001            | <0.001            | <0.001            | <0.05             | <0.001            | <0.001            | <0.001            |                   |
| 75.8              | 219               | 13.3              | 135               | 106               | 34.9              | 32.6              | 34.9              | 32.0              | 62.0              | 290               | 139               | 47.0              | 81.0              | 39.7              | 2.4               | 227               | 45.1              | 183               | 216               | 32.0              | 25.7              | 86.0              | 27.5              | 17.2              | 151               |
| 0.35              | 33.2              | 2.6               | 13.3              | 5.2               | 6.4               | 0.25              | 4.8               | 12.5              | 3.1               | 1510              | 2.4               | 1.0               | 0.47              | 2.0               | 0.17              | 12.0              | 1.1               | 34.3              | 34.4              | 3.2               | 1.2               | 6.3               | 5.1               | 2.1               | 19.1              |
| 10.9              | 80.4              | 15.1              | 27.4              | 15.3              | 7.6               | 9.5               | 5.3               | 21.2              | 12.1              | 457               | 25.2              | 13.9              | 11.4              | 7.0               | 4.1               | 26.1              | 14.8              | 28.7              | 34.9              | 8.5               | 4.6               | 15.1              | 9.8               | 5.5               | 34.1              |

| RX6728<br>Mx-Stby | RX6728<br>Mx-Stby | RX6728<br>Mx-Stby | RX6728<br>Mx-Stby | RX6727<br>Mx-f.g. | RX6727<br>Mx-f.g. | RX6727<br>Mx-f.g. | RX6727<br>Mx-f.g. | RX6727<br>Mx-f.g. | RX6727<br>Mx-f.g. | RX6714<br>Mx-f.g. | RX6714<br>Mx-f.g. | RX6714<br>Mx-f.g. | RX6714<br>Mx-f.g. | RX6716<br>Mx-f.g. |
|-------------------|-------------------|-------------------|-------------------|-------------------|-------------------|-------------------|-------------------|-------------------|-------------------|-------------------|-------------------|-------------------|-------------------|-------------------|-------------------|-------------------|-------------------|-------------------|-------------------|-------------------|-------------------|-------------------|-------------------|-------------------|
| 1_216             | 1_217             | 1_218             | 1_219             | 1_185             | 1_186             | 1_188             | 1_175             | 1_176             | 1_179             | 1_24              | 1_25              | 1_26              | 1_27              | 1_71              | 1_80              | 1_81              | 1_82              | 1_83              | 1_84              | 1_72              | 1_73              | 1_74              | 1_75              | 1_76              |
| 172000            | 172000            | 173200            | 193200            | 201100            | 204000            | 207200            | 214100            | 216400            | 260000            | 267000            | 252100            | 243000            | 256200            | 300600            | 240600            | 284100            | 250400            | 278300            | 230000            | 245000            | 292000            | 288000            | 284000            | 244000            |
| 36660             | 36700             | 36200             | 33500             | 26280             | 25970             | 27760             | 27250             | 28100             | 25100             | 31300             | 31700             | 35300             | 33500             | 26000             | 27770             | 25020             | 26020             | 26020             | 27100             | 28600             | 25300             | 23400             | 25500             | 25700             |
| 107800            | 102400            | 103000            | 97500             | 65800             | 67500             | 70500             | 68600             | 71100             | 58100             | 82400             | 87600             | 97900             | 95500             | 56800             | 68100             | 58900             | 62700             | 60600             | 62600             | 68500             | 65900             | 56600             | 60700             | 61400             |
| 11300             | 10160             | 11500             | 8250              | 5820              | 6060              | 6230              | 5740              | 6120              | 4320              | 6740              | 8650              | 8960              | 8430              | 3160              | 5260              | 3800              | 4370              | 4250              | 4920              | 4610              | 4030              | 3230              | 4130              | 4290              |
| 3500              | 3180              | 3600              | 2210              | 2326              | 2400              | 2416              | 2198              | 2433              | 1160              | 2170              | 2340              | 2910              | 2470              | 672               | 1511              | 905               | 1160              | 1159              | 1480              | 952               | 435               | 718               | 887               | 1130              |
| 4220              | 3640              | 4500              | 2860              | 2750              | 3000              | 3116              | 2580              | 2890              | 1850              | 3360              | 4340              | 4510              | 4600              | 1225              | 2570              | 1631              | 2000              | 1930              | 2370              | 2042              | 1620              | 1247              | 1680              | 1880              |
| 394               | 305               | 414               | 144               | 297               | 331               | 334               | 266               | 324               | 179               | 335               | 420               | 488               | 407               | 98.9              | 261               | 162               | 203               | 191               | 250               | 189               | 107               | 108               | 152               | 190               |
| 1620              | 1270              | 1690              | 540               | 1434              | 1677              | 1637              | 1217              | 1479              | 780               | 1550              | 1790              | 1916              | 1670              | 335               | 1286              | 740               | 987               | 926               | 1275              | 832               | 349               | 423               | 675               | 910               |
| 4000              | 2970              | 3980              | 1180              | 4470              | 5220              | 4930              | 3720              | 4600              | 2430              | 3240              | 4300              | 4590              | 3880              | 1028              | 5210              | 2500              | 3440              | 3310              | 4510              | 2850              | 1180              | 1380              | 2080              | 2950              |
| 225               | 171               | 238               | 74.0              | 210               | 242               | 236               | 169               | 206               | 111               | 241               | 239               | 264               | 214               | 44.7              | 193               | 120               | 151               | 142               | 194               | 124               | 39.1              | 62.6              | 103               | 128               |
| 490               | 325               | 475               | 83.0              | 431               | 492               | 515               | 342               | 440               | 223               | 510               | 459               | 520               | 369               | 87.0              | 393               | 259               | 329               | 310               | 395               | 236               | 55.9              | 124               | 217               | 278               |
| 45.2              | 26.2              | 44.9              | 6.6               | 39.0              | 42.9              | 47.7              | 29.9              | 39.0              | 21.1              | 52.5              | 36.0              | 45.9              | 32.0              | 5.6               | 30.4              | 23.0              | 32.3              | 26.9              | 33.2              | 19.3              | 3.8               | 11.6              | 20.3              | 23.8              |
| 214               | 117               | 221               | 26.9              | 173               | 178               | 221               | 139               | 173               | 93.0              | 300               | 177               | 223               | 125               | 24.6              | 114               | 118               | 148               | 122               | 144               | 78.0              | 12.6              | 49.7              | 90.8              | 110               |
| 26.2              | 10.5              | 22.1              | 1.9               | 15.4              | 15.4              | 18.5              | 13.3              | 15.1              | 9.2               | 31.0              | 17.5              | 21.9              | 13.0              | 2.4               | 10.7              | 12.7              | 16.7              | 12.2              | 14.4              | 8.4               | 1.2               | 5.1               | 8.9               | 10.4              |
| 650               | <846              | 1010              | <885              | 5200              | 6400              | 4640              | 5400              | 2000              | 3360              | 2180              | 3380              | 3230              | 3230              | <770              | <1057             | 1510              | 2200              | 2520              | 1620              | 2300              | <910              | 1670              | 1350              | 1500              |
| 104               | 131               | 154               | 94.2              | 982               | 2130              | 663               | 946               | 799               | 230               | 290               | 346               | 348               | 224               | 73.0              | 240               | 208               | 299               | 346               | 276               | 271               | 26.9              | 155               | 194               | 219               |
| 2.9               | 5.8               | 9.2               | 2.6               | 161               | 281               | 37.4              | 184               | 164               | 32.0              | 14.6              | 35.5              | 32.4              | 17.5              | 7.7               | 74.0              | 30.0              | 117               | 134               | 73.0              | 280               | 0.53              | 36.6              | 43.0              | 23.2              |
| <3.7              | <5.6              | 7.0               | er                | 101               | 2110              | 29.0              | 123               | 143               | 11.5              | 54.0              | 85.0              | 82.0              | 37.4              | 40.0              | 74.0              | 26.0              | 49.0              | 78.0              | 57.0              | 95.0              | <5.7              | 20.1              | 33.0              | 17.6              |
| 12.7              | 16.3              | 22.6              | er                | 11400             | 12000             | 1490              | 14000             | 13500             | 240               | 154               | 1690              | 430               | 46.0              | 6.6               | 4110              | er                | 5600              | 3700              | 3400              | 15400             | 3.9               | 340               | 5200              | 256               |
| 410               | 250               | 490               | er                | 3870              | 15200             | er                | 2940              | 7500              | 2800              | 7800              | 1220              | 1520              | 2880              | 950               | 2120              | 3700              | 6740              | 590               | 2670              | 2160              | <60.6             | 580               | 5800              | 1020              |
| <2.4              | <3.3              | <3.4              | 4.1               | 29.4              | 32.9              | 13.2              | 31.0              | 17.8              | 3.9               | 18.2              | 10.5              | 13.2              | 7.9               | 11.0              | 4.6               | 3.9               | 14.3              | 6.7               | 4.8               | <3.9              | <2.9              | 13.9              | 7.0               | 6.0               |
| <170              | <188              | <217              | <208              | 1080              | 6900              | <194              | er                | <347              | <158              | <164              | 810               | <220              | <230              | <119              | <225              | <189              | <255              | <177              | <178              | <180              | <174              | <202              | <165              | <160              |
| <49.8             | <66.8             | <65.4             | <67.5             | <91.5             | 270               | 105               | er                | 118               | 108               | 560               | 157               | 190               | 200               | 156               | 399               | 150               | 870               | 590               | 470               | 1460              | <40.0             | 640               | 530               | 168               |
| 0.06              | <0.10             | er                | <0.001            | 8.6               | 16.2              | 14.0              | 1.1               | 6.4               | 3.6               | 14.5              | 12.1              | 9.0               | 14.9              | <0.001            | <0.001            | 1.3               | 0.54              | <0.09             | 0.22              | er                | <0.09             | <0.001            | 1.1               | er                |
| <0.86             | <1.3              | <1.0              | <1.2              | <1.5              | <2.3              | <1.4              | 1.9               | 2.4               | 0.98              | <1.0              | <1.1              | 1.2               | <1.3              | <0.84             | <1.3              | <0.98             | <1.3              | <0.87             | <1.2              | <1.2              | <1.1              | <0.87             | <1.0              | <0.87             |
| <1013             | <1169             | <997              | <1317             | 68000             | 94000             | <1346             | 98000             | 48000             | <920              | <1018             | <1171             | <900              | <1310             | <1386             | 6500              | 1900              | 7500              | 4500              | 4200              | 20200             | <1155             | <1291             | 8000              | <1043             |
| <0.001            | <0.22             | <0.001            | <0.001            | 2.8               | 14.6              | er                | 3.2               | 7.3               | 6.3               | 14.9              | 2.0               | 3.9               | 3.4               | 1.0               | 5.8               | 4.9               | 3.3               | 0.68              | 2.1               | 0.89              | <0.20             | 0.53              | 8.0               | 2.6               |
| er                | er                | <0.001            | er                | 0.79              | 0.26              | 0.51              | <0.36             | 0.32              | er                | 2.8               | 4.4               | 1.3               | 15.9              | 0.17              | <0.001            | 0.25              | 0.19              | <0.16             | er                | er                | <0.33             | er                | er                | <0.14             |
| 379               | 381               | 377               | 338               | 299               | 447               | 246               | 271               | 250               | 214               | 366               | 453               | 435               | 373               | 227               | 348               | 238               | 240               | 268               | 320               | 353               | 244               | 213               | 247               | 253               |
| <0.21             | <0.21             | <0.23             | <0.26             | 1.5               | 3.0               | 0.75              | 2.3               | 1.3               | 0.67              | 7.8               | 8.4               | 3.1               | 3.3               | 1.5               | 1.4               | 1.1               | 2.1               | 0.45              | 1.4               | 3.4               | <0.16             | <0.23             | 0.86              | 0.55              |
| <0.001            | <0.001            | <0.001            | <0.001            | <0.47             | <0.001            | <0.001            | <0.001            | <0.001            | <0.001            | <0.001            | <0.001            | <0.001            | er                | <0.001            | er                | <0.001            | <0.19             | <0.001            | <0.001            | <0.001            | <0.001            | <0.001            | <0.001            | <0.001            |
| <0.001            | <0.001            | <0.001            | <0.001            | 0.10              | 0.10              | 0.24              | <0.001            | <0.07             | <0.001            | <0.001            | <0.001            | <0.001            | <0.001            | <0.001            | <0.001            | <0.001            | <0.001            | <0.001            | <0.04             | <0.001            | <0.001            | <0.001            | <0.001            | <0.001            |
| 50.1              | 33.0              | 14.9              | 79.0              | 130               | 136               | 250               | 93.3              | 102               | 57.2              | 5.3               | 28.9              | 43.1              | 33.7              | 0.88              | 5.9               | 3.9               | 4.7               | 3.2               | 4.2               | 3.6               | 1.3               | 1.4               | 1.7               | 1.9               |
| 6.4               | 6.2               | 3.6               | 0.78              | 195               | 355               | 249               | 338               | 307               | 390               | 660               | 383               | 551               | 274               | 8.7               | 113               | 168               | 111               | 100               | 228               | 63.2              | 7.4               | 19.2              | 132               | 160               |
| 10.1              | 8.7               | 12.3              | 12.6              | 114               | 200               | 97.8              | 180               | 166               | 95.9              | 496               | 297               | 359               | 191               | 5.8               | 79.0              | 67.3              | 72.4              | 51.3              | 130               | 51.2              | 5.2               | 11.9              | 60.3              | 90.0              |

| RX6716<br>Mx-f.g. |        |
|-------------------|-------------------|-------------------|-------------------|-------------------|-------------------|-------------------|-------------------|-------------------|-------------------|-------------------|-------------------|-------------------|-------------------|-------------------|-------------------|-------------------|-------------------|-------------------|-------------------|-------------------|-------------------|-------------------|-------------------|-------------------|--------|
| 1_77              | 1_78              | 1_79              | 1_85              | 1_94              | 1_96              | 1_97              | 1_98              | 1_99              | 1_100             | 1_101             | 1_102             | 1_103             | 1_86              | 1_104             | 1_105             | 1_106             | 1_107             | 1_108             | 1_109             | 1_110             | 1_87              | 1_88              | 1_89              | 1_90              | 1_91   |
| 243000            | 320000            | 232900            | 270800            | 260700            | 253000            | 246000            | 258000            | 238000            | 259000            | 284000            | 254000            | 310000            | 276000            | 237100            | 251800            | 252500            | 250000            | 250000            | 256800            | 265000            | 244700            | 260600            | 248100            | 259200            | 258200 |
| 25500             | 24600             | 26720             | 26070             | 26880             | 25300             | 25600             | 26700             | 25000             | 25410             | 25500             | 26070             | 25030             | 25700             | 26180             | 26690             | 26070             | 25600             | 24200             | 26510             | 26000             | 25320             | 26340             | 26320             | 25760             | 25300  |
| 65800             | 58800             | 65400             | 60900             | 63900             | 58500             | 61300             | 58300             | 58200             | 57200             | 60700             | 61300             | 55600             | 59300             | 62800             | 62300             | 61500             | 61300             | 58800             | 60100             | 61200             | 60700             | 61900             | 62200             | 59500             | 58700  |
| 4720              | 3320              | 5210              | 4090              | 4780              | 3910              | 4470              | 3720              | 3570              | 3730              | 3920              | 4340              | 3440              | 4110              | 4670              | 4420              | 4290              | 4330              | 3870              | 4290              | 3920              | 4440              | 4300              | 4490              | 4011              | 4090   |
| 1350              | 671               | 1603              | 1247              | 1550              | 1010              | 1390              | 1091              | 1083              | 1000              | 988               | 1298              | 871               | 1239              | 1498              | 1355              | 1310              | 1400              | 1156              | 1268              | 1165              | 1394              | 1257              | 1428              | 1209              | 1206   |
| 2330              | 1360              | 2470              | 1670              | 2330              | 1610              | 2045              | 1590              | 1560              | 1583              | 1510              | 1960              | 1190              | 1790              | 2250              | 1978              | 1958              | 1955              | 1756              | 1809              | 1733              | 2027              | 1890              | 2063              | 1699              | 1712   |
| 233               | 95.4              | 266               | 176               | 250               | 160               | 200               | 157               | 146               | 155               | 137               | 199               | 106               | 180               | 235               | 205               | 192               | 206               | 165               | 179               | 171               | 208               | 185               | 210               | 174               | 169    |
| 1150              | 357               | 1283              | 801               | 1300              | 700               | 1026              | 705               | 640               | 667               | 593               | 917               | 420               | 772               | 1126              | 927               | 905               | 1028              | 792               | 848               | 764               | 952               | 849               | 1025              | 794               | 760    |
| 4670              | 1170              | 5030              | 2520              | 4220              | 2100              | 3340              | 2034              | 2090              | 2100              | 1830              | 3150              | 1310              | 2500              | 3760              | 3660              | 3120              | 3300              | 2570              | 2660              | 2350              | 3370              | 3120              | 3650              | 2450              | 2334   |
| 188               | 46.6              | 203               | 122               | 189               | 104               | 153               | 108               | 105               | 103               | 85.9              | 139               | 59.4              | 120               | 179               | 154               | 131               | 153               | 120               | 126               | 112               | 143               | 134               | 155               | 120               | 113    |
| 353               | 83.0              | 428               | 241               | 405               | 220               | 302               | 226               | 204               | 207               | 163               | 261               | 117               | 258               | 335               | 305               | 271               | 332               | 235               | 242               | 224               | 276               | 285               | 299               | 230               | 222    |
| 26.7              | 6.7               | 34.4              | 21.6              | 36.1              | 17.2              | 24.4              | 19.3              | 16.2              | 17.2              | 13.8              | 18.8              | 9.1               | 23.2              | 25.5              | 24.6              | 22.3              | 28.0              | 19.6              | 20.0              | 18.5              | 20.8              | 19.3              | 22.4              | 17.5              | 17.7   |
| 101               | 28.8              | 146               | 87.5              | 150               | 75.0              | 91.0              | 76.5              | 65.9              | 68.5              | 52.7              | 72.4              | 41.4              | 99.4              | 102               | 95.0              | 79.0              | 111               | 78.2              | 79.2              | 83.3              | 79.6              | 73.3              | 84.0              | 65.3              | 66.4   |
| 10.7              | 2.6               | 14.9              | 8.6               | 14.6              | 6.3               | 8.1               | 7.8               | 5.7               | 6.8               | 5.9               | 7.4               | 3.5               | 9.2               | 10.3              | 9.2               | 8.5               | 11.0              | 7.7               | 7.3               | 7.0               | 6.9               | 7.1               | 7.9               | 6.6               | 6.1    |
| 1400              | <782              | 1900              | 1920              | 2870              | 820               | 1560              | 1650              | 1940              | <840              | 1260              | <1215             | 1130              | 1420              | 1720              | <1278             | 2360              | 2470              | 1730              | 2160              | 1910              | <1573             | 1280              | 1610              | 1280              | 2190   |
| 237               | 100               | 325               | 165               | 920               | 144               | 230               | 166               | 175               | 148               | 89.0              | 221               | 75.0              | 216               | 277               | 282               | 247               | 269               | 182               | 321               | 178               | 321               | 144               | 252               | 188               | 247    |
| 26.9              | 9.2               | 127               | 15.6              | 313               | 22.6              | 235               | 21.2              | 170               | 36.9              | 44.0              | 630               | 10.5              | 32.0              | 636               | 288               | 570               | 202               | 58.0              | 830               | 62.0              | 980               | 44.0              | 407               | 97.0              | 238    |
| 610               | 14.9              | 282               | 15.2              | 301               | 16.3              | 18.2              | 15.2              | 32.0              | <5.2              | 10.3              | 28.4              | 10.0              | 15.7              | 39.8              | 16.4              | 12.2              | 14.5              | 14.5              | 42.0              | 19.5              | 33.6              | 10.2              | 28.2              | 18.7              | 25.2   |
| 890               | 23.0              | 13200             | 240               | 15700             | 79.0              | 9100              | 59.0              | 7900              | 1000              | 880               | 24600             | <4.1              | 180               | 26200             | 9300              | 19600             | 7400              | 2210              | 29400             | 2290              | 35600             | 1130              | 13100             | 5020              | 11200  |
| 580               | 700               | 56000             | 2150              | 8100              | 500               | 2800              | 1150              | 2500              | 720               | 338               | 2480              | 340               | 1220              | 88000             | 1270              | 1860              | 6600              | 550               | 9000              | 400               | 8500              | 283               | 7500              | 1010              | 7200   |
| 4.5               | 15.8              | 11.5              | 7.7               | <4.7              | 12.4              | 5.5               | 16.2              | 20.4              | <3.0              | 9.2               | 8.5               | 7.2               | 12.0              | 12.0              | 8.4               | 9.0               | <4.1              | 4.0               | 8.7               | 8.4               | 11.8              | 6.1               | 11.5              | 7.5               | 9.7    |
| <165              | <192              | <297              | <141              | 3710              | <161              | <176              | <165              | 125               | <160              | <190              | <360              | <147              | <201              | <290              | <300              | <245              | <226              | <202              | <266              | <194              | <419              | <172              | <291              | <259              | <300   |
| 119               | 101               | 1620              | 151               | 650               | 110               | 920               | 165               | 770               | 225               | 124               | 1840              | 71.0              | 176               | 1970              | 1150              | 1440              | 1030              | 310               | 2490              | 490               | 3250              | 272               | 1540              | 518               | 1480   |
| er                | er                | 9.9               | <0.07             | 2.0               | <0.001            | 0.69              | er                | <0.06             | er                | <0.09             | <0.001            | <0.001            | <0.001            | 5.9               | <0.001            | 0.10              | 0.26              | <0.08             | 0.43              | <0.09             | 1.1               | <0.001            | 0.79              | <0.001            | 1.0    |
| <0.75             | <1.0              | <1.6              | <1.0              | <1.5              | <0.78             | <1.0              | <0.80             | <0.68             | <1.1              | <1.0              | <1.9              | <0.91             | <1.0              | <1.7              | <1.3              | <1.1              | <1.2              | <0.72             | <1.3              | <0.89             | <1.8              | <0.95             | <1.5              | <1.5              | <1.4   |
| <1040             | 1800              | 18400             | <848              | 12500             | <1031             | 11200             | <1227             | 18000             | 2680              | 1700              | 35700             | <1002             | 1200              | 35300             | 12000             | 27400             | 12800             | 2400              | 45000             | 3500              | 56700             | 2500              | 19600             | 8600              | 13000  |
| 0.27              | 1.0               | 43.0              | 4.3               | 14.2              | 0.82              | 5.7               | 1.8               | 1.5               | 0.40              | 0.40              | 0.32              | 0.76              | 2.7               | 137               | 0.57              | 0.53              | 5.3               | 0.45              | 7.6               | 0.58              | 4.4               | er                | 4.7               | 0.24              | 7.2    |
| 0.11              | <0.15             | 0.46              | <0.13             | <0.001            | 0.21              | 0.35              | <0.16             | er                | 0.19              | 0.12              | er                | 0.26              | <0.16             | <0.37             | er                | <0.20             | er                | 0.16              | 0.19              | 0.30              | <0.32             | <0.16             | <0.22             | <0.21             | er     |
| 404               | 235               | 473               | 266               | 486               | 228               | 220               | 230               | 206               | 194               | 226               | 260               | 229               | 256               | 270               | 254               | 222               | 232               | 215               | 255               | 244               | 259               | 245               | 251               | 221               | 227    |
| 0.66              | <0.19             | 1.5               | 0.48              | 1.9               | 0.41              | 0.69              | 1.2               | 0.61              | 0.52              | 0.32              | 0.85              | <0.22             | 0.67              | 2.4               | <0.35             | 0.75              | 0.45              | 0.32              | 0.98              | 0.33              | 0.57              | <0.21             | 0.47              | 0.43              | 0.35   |
| <0.19             | <0.001            | <0.001            | <0.001            | <0.29             | <0.001            | <0.001            | <0.15             | <0.10             | <0.001            | <0.001            | <0.001            | <0.13             | <0.001            | <0.001            | <0.001            | <0.20             | <0.001            | <0.001            | <0.001            | <0.001            | <0.001            | <0.21             | <0.001            | <0.001            |        |
| <0.001            | <0.04             | <0.001            | <0.001            | <0.06             | <0.001            | <0.06             | <0.001            | <0.001            | <0.001            | <0.001            | <0.08             | <0.001            | <0.001            | <0.001            | <0.001            | <0.001            | <0.001            | <0.001            | <0.001            | <0.001            | <0.001            | <0.001            | <0.001            | <0.001            |        |
| 5.1               | 0.49              | 5.5               | 1.2               | 9.4               | 1.6               | 3.0               | 0.32              | 0.52              | 0.95              | 1.1               | 1.4               | 0.25              | 1.1               | 1.5               | 1.1               | 1.1               | 3.2               | 1.0               | 0.64              | 0.50              | 1.1               | 0.78              | 1.3               | 0.37              | 0.54   |
| 87.0              | 36.3              | 182               | 102               | 215               | 69.6              | 142               | 82.0              | 39.6              | 76.0              | 26.9              | 80.0              | 52.0              | 110               | 142               | 76.3              | 91.3              | 128               | 84.5              | 71.3              | 34.6              | 78.4              | 22.6              | 50.9              | 50.4              | 65.2   |
| 57.5              | 16.5              | 137               | 49.7              | 150               | 42.9              | 95.0              | 40.8              | 21.8              | 41.8              | 17.3              | 53.7              | 17.6              | 62.1              | 98.4              | 49.0              | 57.5              | 71.4              | 53.4              | 63.5              | 18.5              | 61.0              | 12.5              | 41.3              | 34.5              | 48.3   |

| RX6716<br>Mx-f.g. | RX6717<br>Mx-f.g. |
|-------------------|-------------------|-------------------|-------------------|-------------------|-------------------|-------------------|-------------------|-------------------|-------------------|-------------------|-------------------|-------------------|-------------------|-------------------|-------------------|-------------------|-------------------|-------------------|-------------------|-------------------|-------------------|-------------------|-------------------|-------------------|
| 1_92              | 1_93              | 1_48              | 1_58              | 1_59              | 1_60              | 1_61              | 1_49              | 1_50              | 1_51              | 1_52              | 1_53              | 1_56              | 1_111             | 1_113             | 1_116             | 1_134             | 1_136             | 1_138             | 1_139             | 1_140             | 1_126             | 1_127             | 1_128             | 1_130             |
| 258000            | 252000            | 257000            | 252000            | 281400            | 273300            | 241600            | 256000            | 269500            | 252000            | 261000            | 259400            | 215000            | 221400            | 210800            | 221300            | 239000            | 235600            | 239400            | 227800            | 232300            | 215000            | 210600            | 223800            | 225400            |
| 25500             | 25200             | 25720             | 26390             | 25810             | 26260             | 27090             | 25450             | 26170             | 26000             | 26600             | 25870             | 29500             | 26570             | 27080             | 26820             | 31200             | 28720             | 28970             | 28860             | 29270             | 27250             | 27730             | 28950             | 29430             |
| 57000             | 58600             | 60130             | 63100             | 59400             | 66300             | 67200             | 58400             | 60300             | 60200             | 59300             | 59710             | 74100             | 65090             | 66500             | 66900             | 75100             | 69800             | 69500             | 70200             | 73300             | 67730             | 70470             | 72000             | 73900             |
| 3970              | 3910              | 4093              | 4800              | 3764              | 4070              | 5170              | 3843              | 3822              | 4240              | 4100              | 4170              | 6460              | 5690              | 5870              | 5840              | 5890              | 5660              | 5640              | 5650              | 6270              | 5880              | 6331              | 6220              | 6320              |
| 1176              | 1197              | 1236              | 1540              | 1045              | 563               | 1527              | 1076              | 1097              | 1350              | 1205              | 1185              | 2253              | 1928              | 2072              | 2005              | 2090              | 1929              | 1768              | 1898              | 2086              | 1991              | 2205              | 2242              | 2265              |
| 1640              | 1635              | 1814              | 2480              | 1544              | 1660              | 2410              | 1610              | 1583              | 1933              | 1850              | 1806              | 3180              | 3237              | 3304              | 3272              | 2940              | 2800              | 2734              | 2680              | 3120              | 3314              | 3673              | 3230              | 3110              |
| 166               | 161               | 176               | 257               | 145               | 133               | 240               | 152               | 147               | 194               | 198               | 176               | 356               | 355               | 362               | 365               | 327               | 298               | 308               | 293               | 337               | 366               | 405               | 348               | 352               |
| 723               | 762               | 800               | 1310              | 620               | 527               | 1130              | 687               | 636               | 879               | 888               | 802               | 2120              | 1764              | 1679              | 1805              | 1663              | 1438              | 1444              | 1410              | 1571              | 1781              | 1936              | 1615              | 1695              |
| 2270              | 2840              | 2690              | 5000              | 2056              | 2040              | 4360              | 2100              | 1909              | 2730              | 2900              | 2680              | 6670              | 6570              | 6360              | 6650              | 5820              | 5170              | 5430              | 5200              | 5830              | 6604              | 6990              | 5430              | 6080              |
| 117               | 114               | 115               | 202               | 99.6              | 63.2              | 171               | 101               | 92.3              | 134               | 139               | 126               | 270               | 275               | 258               | 277               | 262               | 216               | 233               | 218               | 244               | 281               | 296               | 244               | 265               |
| 226               | 226               | 237               | 397               | 220               | 122               | 338               | 190               | 168               | 249               | 285               | 255               | 518               | 584               | 513               | 594               | 582               | 464               | 546               | 484               | 517               | 603               | 592               | 484               | 586               |
| 20.7              | 18.9              | 17.8              | 29.1              | 18.0              | 9.9               | 25.7              | 14.6              | 13.0              | 21.0              | 22.9              | 21.2              | 38.5              | 59.4              | 48.0              | 57.0              | 54.1              | 46.2              | 53.1              | 46.4              | 48.5              | 57.8              | 51.7              | 42.4              | 55.2              |
| 72.0              | 82.4              | 70.1              | 115               | 75.5              | 31.0              | 108               | 52.3              | 47.5              | 83.4              | 85.5              | 72.4              | 142               | 304               | 228               | 285               | 306               | 233               | 261               | 253               | 249               | 291               | 240               | 215               | 272               |
| 7.1               | 7.1               | 6.1               | 10.3              | 9.2               | 3.0               | 10.3              | 5.1               | 4.5               | 7.3               | 8.3               | 7.1               | 12.4              | 34.3              | 28.7              | 34.9              | 32.5              | 28.0              | 33.2              | 30.1              | 29.8              | 34.6              | 27.4              | 25.1              | 29.9              |
| 2970              | 2710              | 2500              | <1014             | 1500              | 3070              | 2100              | 1670              | 1890              | 1650              | 1840              | 1900              | 9300              | 4860              | 4300              | 3600              | 5400              | 5300              | 8500              | 6400              | 7300              | 4230              | 3440              | 3900              | 3560              |
| 217               | 184               | 217               | 258               | 93.0              | 100               | 243               | 179               | 113               | 187               | 173               | 273               | 624               | 751               | 1098              | 597               | 673               | 807               | 975               | 780               | 1046              | 685               | 838               | 913               | 688               |
| 135               | 56.0              | 400               | 75.0              | 23.4              | 110               | 169               | 64.0              | 11.1              | 45.0              | 19.0              | 2320              | 266               | 307               | 756               | 385               | 172               | 442               | 272               | 267               | 650               | 597               | 806               | 1000              | 204               |
| 15.2              | er                | 26.5              | 117               | 14.3              | 16.5              | 16.6              | 19.5              | 16.3              | 9.8               | 19.8              | 21.0              | 6500              | <6.7              | 24.9              | 15.6              | <4.1              | <8.2              | <5.6              | 10.4              | 310               | 86.3              | 11.0              | <10.2             | <7.2              |
| 2800              | er                | 14300             | 6700              | er                | 3000              | 7700              | 3080              | 640               | 1050              | 410               | 36600             | 3700              | 12500             | 48700             | 31900             | 4100              | 41000             | 2400              | 20800             | 36900             | 52900             | 48300             | 39900             | 19200             |
| 2380              | 680               | 4830              | 850               | er                | 920               | 16100             | 700               | 540               | 780               | 3700              | 3200              | 1200              | 3500              | 13800             | 19800             | 2300              | 18400             | 4450              | 12900             | 19900             | 18580             | 28700             | 13300             | 25900             |
| 18.9              | 17.8              | 8.0               | 10.3              | 7.5               | 12.4              | 13.8              | 7.3               | 7.8               | 5.8               | 12.7              | 13.5              | 13.3              | 23.9              | 31.8              | 23.6              | 13.9              | 45.0              | 33.3              | 26.5              | 37.4              | 31.2              | 54.4              | 22.7              | 14.6              |
| <197              | <185              | <282              | <252              | <189              | <183              | <312              | <216              | <201              | <191              | <173              | <323              | <211              | <244              | 1300              | <277              | <203              | <326              | <203              | <202              | <367              | 121               | 945               | 550               | <269              |
| 420               | 169               | 1280              | 820               | 215               | 420               | 880               | 332               | 166               | 133               | 180               | 2140              | 440               | 500               | 1270              | 900               | 137               | 950               | 245               | 770               | 1380              | 1201              | 950               | 1340              | 510               |
| <0.001            | 0.13              | 0.27              | <0.11             | 0.26              | er                | 2.3               | <0.001            | er                | er                | 1.4               | er                | 0.28              | 0.62              | 1.7               | 2.6               | er                | 7.5               | 0.89              | 6.1               | 6.3               | 17.3              | 3.8               | 0.68              | 4.9               |
| <1.1              | <0.95             | <1.4              | <1.4              | <0.95             | <0.99             | <1.7              | <1.3              | <1.0              | <0.85             | <0.90             | <2.3              | <0.82             | 2.9               | 4.8               | 4.8               | 3.3               | 3.0               | 3.7               | 2.9               | er                | 4.4               | 3.1               | 4.0               | 3.3               |
| 3700              | <1255             | 19400             | 9800              | <1260             | 5500              | 10700             | 4200              | <1553             | <1113             | <999              | 53000             | 8800              | 20600             | 92000             | 45300             | 5200              | 68000             | 3500              | 31100             | 58000             | 71700             | 61700             | 78000             | 40800             |
| 1.8               | 0.87              | 4.5               | <0.25             | 2.4               | 1.3               | 18.1              | 0.60              | 0.44              | 2.7               | 23.0              | er                | 0.98              | 0.57              | 2.0               | 9.0               | er                | 2.5               | 0.74              | 1.7               | er                | 4.8               | 2.3               | 0.95              | 4.1               |
| er                | er                | 0.56              | 0.19              | er                | <0.001            | er                | er                | 0.34              | 0.28              | 0.25              | <0.30             | 0.20              | 0.60              | 2.6               | 0.86              | 0.26              | 0.58              | 0.25              | er                | 0.53              | 3.8               | 1.4               | 0.29              | 0.41              |
| 226               | 222               | 231               | 215               | 207               | 239               | 237               | 213               | 221               | 270               | 240               | 214               | 324               | 244               | 254               | 244               | 292               | 232               | 255               | 274               | 347               | 262               | 269               | 312               | 303               |
| 0.31              | 0.43              | 1.1               | 0.72              | 0.46              | 0.42              | 2.8               | 0.63              | <0.39             | 0.79              | 0.72              | 0.53              | 1.5               | <0.17             | 0.50              | 1.3               | 1.0               | 1.1               | <0.39             | 1.1               | 0.71              | 0.24              | 0.18              | 0.94              | 0.25              |
| <0.001            | <0.15             | <0.001            | <0.18             | <0.001            | <0.16             | <0.001            | <0.001            | <0.17             | <0.001            | <0.001            | <0.001            | <0.001            | <0.20             | <0.001            | <0.001            | <0.15             | <0.001            | <0.17             | er                | er                | 0.27              | 0.14              | <0.33             | <0.001            |
| <0.001            | <0.001            | <0.001            | <0.001            | <0.001            | <0.05             | <0.07             | <0.001            | <0.001            | <0.04             | <0.001            | <0.001            | <0.001            | 0.14              | <0.001            | er                | <0.06             | 0.68              | er                | 0.23              | 0.22              | 1.1               | 0.21              | <0.14             | 0.20              |
| 0.41              | 0.79              | 0.62              | 7.4               | 6.9               | 2.4               | 10.3              | 0.45              | 0.23              | 1.2               | 1.1               | 1.4               | 12.5              | 304               | 455               | 471               | 900               | 570               | 494               | 834               | 713               | 463               | 466               | 374               | 522               |
| 79.0              | 67.0              | 99.0              | 85.0              | 59.9              | 25.0              | 135               | 39.4              | 23.0              | 106               | 103               | 81.0              | 317               | 528               | 352               | 430               | 596               | 611               | 577               | 663               | 598               | 542               | 345               | 558               | 508               |
| 46.0              | 35.9              | 68.1              | 61.1              | 24.7              | 13.0              | 91.3              | 24.4              | 11.8              | 68.0              | 57.7              | 55.6              | 134               | 277               | 235               | 236               | 359               | 416               | 324               | 466               | 479               | 239               | 169               | 379               | 292               |

| RX6717<br>Mx-f.g. | RX6717<br>Mx-f.g. | RX6718<br>Mx-f.g. | RX6719<br>Mx-f.g. | RX6719<br>Mx-f.g. | RX6719<br>Mx-f.g. | RX6723<br>Mx-f.g. |
|-------------------|-------------------|-------------------|-------------------|-------------------|-------------------|-------------------|-------------------|-------------------|-------------------|-------------------|-------------------|-------------------|-------------------|-------------------|-------------------|-------------------|-------------------|-------------------|-------------------|-------------------|-------------------|-------------------|-------------------|-------------------|-------------------|
| 1_131             | 1_132             | 1_6               | 1_9               | 1_10              | 1_11              | 1_145             | 1_146             | 1_149             | 1_150             | 1_151             | 1_1               | 1_12              | 1_13              | 1_14              | 1_19              | 1_23              | 1_27              | 1_89              | 1_91              | 1_93              | 1_94              | 1_95              | 1_96              | 1_97              | 1_100             |
| 237200            | 239000            | 211100            | 209000            | 208500            | 212700            | 213500            | 222900            | 226500            | 218800            | 224800            | 225600            | 211500            | 231000            | 225600            | 239400            | 229700            | 231600            | 204000            | 183800            | 138900            | 146400            | 149900            | 148100            | 144700            | 147900            |
| 29360             | 28600             | 24260             | 25130             | 24990             | 25160             | 26070             | 26000             | 25530             | 25620             | 26130             | 25600             | 27320             | 26270             | 26310             | 24130             | 23190             | 22990             | 32500             | 31310             | 37600             | 37870             | 37200             | 37400             | 37960             | 37400             |
| 69400             | 69300             | 59300             | 62620             | 62610             | 63270             | 64100             | 65800             | 66200             | 63500             | 64400             | 63600             | 70300             | 65700             | 64300             | 55000             | 54600             | 56100             | 87100             | 87200             | 129100            | 123100            | 119600            | 125100            | 128300            | 126700            |
| 5610              | 5130              | 5100              | 5485              | 5477              | 5559              | 5760              | 5810              | 5570              | 5630              | 5510              | 5510              | 6950              | 5990              | 5840              | 4270              | 4270              | 4180              | 9620              | 9410              | 16550             | 14510             | 14230             | 15370             | 16240             | 15730             |
| 1740              | 1490              | 1633              | 1711              | 1718              | 1776              | 2030              | 2023              | 1860              | 1857              | 1687              | 1881              | 2830              | 2049              | 1973              | 834               | 916               | 897               | 2942              | 3038              | 4470              | 4054              | 3980              | 4410              | 4822              | 4505              |
| 2719              | 2570              | 2669              | 3008              | 2954              | 3064              | 3250              | 3095              | 3150              | 2956              | 2876              | 2920              | 4470              | 3242              | 3166              | 2033              | 2215              | 2160              | 4470              | 4780              | 7540              | 7340              | 7390              | 7450              | 8420              | 7500              |
| 294               | 284               | 296               | 334               | 320               | 338               | 352               | 344               | 333               | 328               | 314               | 326               | 576               | 367               | 343               | 197               | 217               | 210               | 468               | 501               | 676               | 681               | 735               | 671               | 781               | 699               |
| 1436              | 1530              | 1406              | 1632              | 1551              | 1631              | 1681              | 1662              | 1620              | 1619              | 1492              | 1600              | 3500              | 1744              | 1656              | 886               | 1025              | 973               | 2028              | 2170              | 2634              | 2682              | 2980              | 2760              | 3060              | 2743              |
| 5210              | 4890              | 5790              | 6661              | 6101              | 6671              | 6340              | 6280              | 6380              | 6560              | 5960              | 6020              | 11800             | 6580              | 6350              | 4090              | 5260              | 4430              | 5130              | 5450              | 6060              | 6420              | 7390              | 6320              | 6850              | 6440              |
| 226               | 195               | 219               | 259               | 245               | 261               | 256               | 258               | 250               | 260               | 229               | 244               | 593               | 260               | 264               | 140               | 162               | 161               | 289               | 312               | 328               | 340               | 384               | 326               | 367               | 333               |
| 484               | 449               | 496               | 573               | 538               | 566               | 542               | 568               | 529               | 563               | 523               | 539               | 1770              | 590               | 576               | 330               | 400               | 382               | 560               | 547               | 550               | 580               | 735               | 565               | 594               | 571               |
| 48.1              | 49.1              | 50.1              | 56.2              | 52.6              | 55.8              | 52.1              | 53.4              | 54.0              | 54.4              | 51.9              | 55.3              | 228               | 58.0              | 57.3              | 37.5              | 44.4              | 47.3              | 44.6              | 45.4              | 39.6              | 44.3              | 52.4              | 42.3              | 44.6              | 45.2              |
| 257               | 268               | 268               | 279               | 270               | 282               | 259               | 274               | 288               | 282               | 279               | 281               | 1420              | 280               | 297               | 209               | 239               | 280               | 193               | 172               | 166               | 187               | 200               | 169               | 166               | 170               |
| 30.7              | 28.9              | 30.8              | 33.0              | 31.1              | 34.4              | 31.0              | 33.0              | 34.1              | 32.0              | 32.3              | 35.7              | 152               | 32.6              | 35.4              | 27.2              | 31.1              | 32.0              | 17.5              | 16.2              | 15.6              | 18.5              | 18.0              | 14.2              | 15.6              | 15.2              |
| 5300              | 6800              | 5600              | 5530              | 5230              | 5130              | 3700              | 5100              | 3700              | 7000              | 5000              | 6000              | 278000            | 5790              | 4800              | 9500              | 9950              | 9100              | 6000              | 5700              | 5200              | 4600              | 4400              | 3900              | 4300              | 3000              |
| 770               | 725               | 1077              | 1224              | 1293              | 1020              | 972               | 842               | 839               | 1411              | 975               | 799               | 3730              | 909               | 836               | 1315              | 1539              | 1488              | 1523              | 1460              | 822               | 889               | 957               | 890               | 838               | 797               |
| 187               | 161               | 413               | 1011              | 1043              | 711               | 840               | 299               | 780               | 1134              | 591               | 354               | 9500              | 268               | 311               | 258               | 620               | 990               | 28.0              | 29.4              | 93.0              | 65.9              | 53.0              | 62.0              | 66.0              | 72.0              |
| <5.1              | <4.3              | 21.6              | 11.0              | 18.5              | 11.9              | 11.6              | 5.7               | <5.8              | 16.0              | <8.1              | <7.6              | 72.0              | 7.8               | <8.8              | 120               | 23000             | 59.0              | 175               | 13.7              | 22.6              | <7.5              | 33.0              | 24.2              | 11.5              | 91.0              |
| 2410              | 350               | 22300             | 53500             | 70700             | 42700             | 28700             | 9800              | 50000             | 44500             | 32900             | 16300             | 32700             | 10600             | 14200             | 2530              | 19100             | 47000             | 430               | 271               | 22700             | 2260              | 1180              | 9600              | 17600             | 24400             |
| 9700              | 1000              | 5870              | 12980             | 15710             | 10430             | 7700              | 3200              | 9500              | 15000             | 6670              | 4100              | 43200             | 3340              | 4360              | 1730              | 18400             | 27100             | 93000             | 2010              | 5000              | 2440              | 2260              | 5700              | 6400              | 12300             |
| 19.0              | 20.4              | 39.9              | 49.9              | 53.7              | 42.2              | 35.7              | 21.4              | 39.7              | 59.9              | 31.8              | 30.1              | 590               | 24.1              | 26.9              | 49.5              | 118               | 142               | 15.8              | 8.8               | 14.8              | 11.9              | 12.2              | 15.7              | 15.8              | 12.8              |
| <212              | <120              | 600               | 136               | 1110              | 69.0              | <312              | <225              | <304              | <442              | <297              | 310               | <581              | <272              | <293              | <246              | 550               | <345              | <224              | <190              | 320               | <259              | <152              | 740               | <339              | <389              |
| 164               | 138               | 910               | 1729              | 1994              | 1219              | 1300              | 590               | 1290              | 2360              | 871               | 670               | 3370              | 620               | 610               | 341               | 1130              | 2330              | 237               | 169               | 310               | 190               | 167               | 218               | 530               | 344               |
| 0.62              | <0.07             | er                | 1.0               | 5.4               | 1.6               | 0.18              | 0.16              | er                | 9.2               | 0.14              | <0.001            | 1620              | 0.13              | 1.7               | <0.001            | 8.7               | 8.8               | 150               | 2.6               | 3.2               | 3.7               | 6.2               | 8.9               | 6.4               | 9.7               |
| 3.4               | 2.5               | 3.1               | 5.3               | 5.2               | 4.3               | 4.1               | 2.0               | 5.6               | 9.0               | 4.2               | 3.4               | 71.0              | 2.9               | 3.1               | 10.6              | 15.0              | 19.2              | <1.4              | <1.3              | 2.1               | <1.5              | 1.1               | <1.4              | <1.4              | <2.0              |
| 3500              | <1037             | 38900             | 74500             | 98100             | 58800             | 60200             | 20100             | 73000             | 71100             | 51900             | 29000             | 64000             | 16900             | 20700             | 14000             | 39200             | 90000             | <1493             | <1427             | 36800             | 10300             | 1400              | 22700             | 29300             | 38300             |
| 1.0               | er                | er                | 0.94              | 2.4               | 0.99              | <0.001            | er                | <0.34             | 6.9               | <0.001            | <0.31             | 609               | er                | 0.41              | 0.74              | 45.0              | 58.0              | 380               | 2.7               | 3.6               | 3.6               | 5.0               | 4.8               | 8.7               | 6.9               |
| 0.79              | 0.43              | 0.76              | 1.3               | 6.7               | 17.6              | er                | <0.18             | <0.51             | 11.0              | 0.44              | 0.29              | 870               | <0.22             | 1.2               | 0.21              | 14.1              | 110               | 4.4               | 12.6              | 6.2               | 0.20              | 1.4               | 0.51              | 1.0               | 0.43              |
| 274               | 271               | 231               | 255               | 258               | 243               | 275               | 260               | 289               | 231               | 237               | 276               | 262               | 259               | 239               | 228               | 229               | 227               | 396               | 360               | 534               | 479               | 472               | 530               | 505               | 534               |
| 0.23              | <0.17             | <0.48             | 0.10              | 0.12              | 0.05              | 0.56              | 0.43              | <0.35             | <0.51             | <0.30             | 1.0               | 1.5               | 0.53              | 0.45              | 1.5               | 16.0              | 21.0              | 0.55              | 0.66              | 1.1               | 0.80              | 1.2               | 0.93              | 4.1               | <0.48             |
| <0.001            | <0.001            | er                | 0.15              | 0.30              | 0.69              | <0.001            | <0.001            | <0.24             | er                | <0.24             | <0.22             | 35.7              | <0.21             | er                | <0.001            | 0.65              | 9.0               | <0.18             | 0.70              | 0.15              | <0.28             | <0.001            | er                | <0.001            | <0.27             |
| <0.001            | <0.001            | er                | 0.07              | 0.25              | 0.44              | er                | <0.05             | <0.001            | 1.8               | er                | <0.07             | 102               | er                | er                | <0.001            | 0.17              | 0.36              | 0.10              | er                | er                | er                | <0.001            | <0.06             | 0.07              | er                |
| 261               | 496               | 421               | 529               | 408               | 479               | 638               | 762               | 729               | 750               | 560               | 861               | 909               | 765               | 701               | 471               | 628               | 253               | 2870              | 2920              | 2291              | 2046              | 2740              | 2280              | 3210              | 2410              |
| 522               | 538               | 646               | 720               | 1280              | 986               | 608               | 798               | 719               | 1810              | 539               | 618               | 117000            | 881               | 855               | 379               | 5700              | 7200              | 504               | 274               | 324               | 228               | 309               | 179               | 262               | 233               |
| 255               | 241               | 403               | 380               | 363               | 337               | 446               | 487               | 360               | 671               | 313               | 455               | 4224              | 553               | 500               | 333               | 1133              | 1368              | 461               | 409               | 357               | 368               | 425               | 354               | 501               | 392               |

## Appendix 5: La-ICP-MS data (cont.)

| RX6720  | RX6723  | RX6724  | RX6720 | RX6720 |        |
|---------|---------|---------|---------|---------|---------|---------|---------|---------|---------|---------|---------|---------|---------|---------|---------|---------|---------|---------|---------|---------|---------|---------|---------|--------|--------|--------|
| Mx-f.g. | Irr.   | Irr.   |        |
| 1_102   | 1_103   | 1_105   | 1_106   | 1_109   | 1_118   | 1_119   | 1_120   | 1_121   | 1_122   | 1_124   | 1_125   | 1_110   | 1_111   | 1_112   | 1_113   | 1_114   | 1_115   | 1_116   | 1_117   | 1_126   | 1_127   | 1_128   | 1_130   | 1_131  | 1_1    | 1_2    |
| 147000  | 144000  | 231000  | 239200  | 277000  | 203500  | 292000  | 210000  | 311000  | 212800  | 187200  | 171400  | 287000  | 246000  | 239500  | 227900  | 273000  | 198800  | 254000  | 209900  | 102800  | 169000  | 122600  | 174200  | 202400 | 218100 | 222300 |
| 35950   | 36000   | 24200   | 24690   | 29300   | 22960   | 31800   | 24670   | 32240   | 23140   | 20760   | 19770   | 32100   | 27300   | 26570   | 24520   | 30500   | 21750   | 28000   | 23480   | 11760   | 17900   | 13860   | 19310   | 22020  | 27150  | 26110  |
| 116600  | 117800  | 59500   | 59900   | 70400   | 55400   | 75300   | 60400   | 80100   | 57600   | 51000   | 49100   | 77100   | 67900   | 64200   | 61000   | 71200   | 53300   | 67500   | 57000   | 29140   | 44200   | 34970   | 46700   | 55300  | 74300  | 70900  |
| 14530   | 14080   | 5450    | 5220    | 6360    | 4970    | 6890    | 5590    | 6980    | 5200    | 4670    | 4510    | 7020    | 6050    | 5980    | 5550    | 6430    | 4910    | 6380    | 5030    | 2856    | 3930    | 3200    | 4310    | 4990   | 7450   | 6650   |
| 4170    | 4190    | 1330    | 1350    | 1650    | 1392    | 1900    | 1554    | 2140    | 1356    | 1290    | 1267    | 1880    | 1633    | 1557    | 1510    | 1677    | 1402    | 1725    | 1358    | 849     | 1106    | 964     | 1147    | 1328   | 2217   | 2071   |
| 7290    | 7910    | 2870    | 2860    | 3670    | 2829    | 3740    | 3070    | 3959    | 2884    | 2693    | 2574    | 3800    | 3530    | 3290    | 3206    | 3670    | 2890    | 3370    | 2836    | 1683    | 2240    | 1917    | 2430    | 2704   | 3705   | 3410   |
| 735     | 819     | 344     | 340     | 425     | 335     | 468     | 353     | 449     | 346     | 319     | 319     | 446     | 402     | 401     | 398     | 442     | 349     | 394     | 341     | 233     | 265     | 238     | 295     | 336    | 369    | 360    |
| 3020    | 3510    | 1800    | 1757    | 2130    | 1716    | 2163    | 1963    | 2400    | 1897    | 1744    | 1712    | 2230    | 2038    | 2057    | 2083    | 2350    | 1903    | 2110    | 1762    | 1372    | 1550    | 1473    | 1649    | 1822   | 1652   | 1683   |
| 7410    | 8370    | 8100    | 7630    | 9540    | 8150    | 10060   | 9720    | 10850   | 9430    | 8090    | 8030    | 10360   | 9590    | 10460   | 10600   | 10220   | 9390    | 10370   | 8300    | 6950    | 7540    | 7050    | 8110    | 8650   | 5540   | 5720   |
| 421     | 456     | 271     | 283     | 339     | 292     | 363     | 333     | 380     | 321     | 288     | 291     | 367     | 338     | 357     | 364     | 372     | 325     | 348     | 302     | 259     | 276     | 261     | 299     | 319    | 244    | 263    |
| 789     | 809     | 669     | 690     | 857     | 721     | 888     | 835     | 895     | 801     | 711     | 732     | 851     | 827     | 863     | 898     | 920     | 808     | 810     | 733     | 710     | 727     | 703     | 774     | 808    | 534    | 599    |
| 65.5    | 60.5    | 90.0    | 84.5    | 99.7    | 75.9    | 99.3    | 90.4    | 99.8    | 83.6    | 82.8    | 80.8    | 93.6    | 85.1    | 96.4    | 101     | 106     | 83.9    | 85.9    | 84.1    | 84.8    | 89.3    | 83.8    | 93.6    | 95.8   | 55.0   | 60.6   |
| 275     | 223     | 491     | 455     | 620     | 395     | 555     | 437     | 549     | 396     | 421     | 381     | 483     | 436     | 495     | 507     | 602     | 446     | 446     | 433     | 430     | 535     | 446     | 528     | 516    | 286    | 315    |
| 25.5    | 18.4    | 58.9    | 55.3    | 62.4    | 41.7    | 65.1    | 48.2    | 62.5    | 43.3    | 41.9    | 41.8    | 56.1    | 47.5    | 59.4    | 59.0    | 72.3    | 46.5    | 46.4    | 47.6    | 41.1    | 52.1    | 40.6    | 54.3    | 56.9   | 30.5   | 32.9   |
| 5600    | 5500    | 4160    | 5800    | 4810    | 5500    | 4700    | 4910    | 5700    | 3630    | 4900    | 3900    | 4900    | 4800    | 3500    | 5200    | 5100    | 5800    | 3800    | 6200    | 5300    | 7000    | 4500    | 3900    | 6600   | 2810   | 2580   |
| 623     | 869     | 425     | 533     | 438     | 725     | 473     | 588     | 519     | 475     | 772     | 711     | 495     | 582     | 508     | 497     | 448     | 698     | 413     | 729     | 1320    | 2940    | 759     | 555     | 735    | 317    | 286    |
| 86.0    | 22.9    | 43.3    | 136     | 40.3    | 294     | 75.0    | 96.0    | 59.3    | 96.0    | 568     | 570     | 89.0    | 72.0    | 196     | 67.9    | 41.4    | 192     | 133     | 285     | 382     | 560     | 297     | 126     | 102    | 17.1   | 39.0   |
| 93.0    | 100     | 159     | 371     | 710     | 28.9    | 510     | 174     | 164     | 61.0    | <18.9   | er      | 23.7    | 270     | 199     | 173     | 360     | 12.5    | 61.0    | 24.7    | er      | 52.0    | <5.9    | 61.0    | 30.1   | 45.5   | 11.1   |
| 32000   | 490     | 68.0    | 8500    | 29.6    | 25700   | 1050    | 2890    | 650     | 5100    | 64500   | 71000   | 5600    | 1350    | 13000   | 4230    | 1590    | 13000   | 14600   | 28500   | 37000   | 78000   | 35500   | 15400   | 5800   | 1120   | 188    |
| 11000   | 2640    | 1270    | 2250    | 650     | 7700    | 1870    | 2360    | 3930    | 2020    | 61000   | 6470    | 18400   | 3580    | 11200   | 12400   | 2170    | 1950    | 13600   | 24100   | 9300    | 26600   | 9100    | 6180    | 5210   | 2940   | 3090   |
| 13.1    | 8.7     | 12.4    | 18.7    | 18.7    | 30.7    | 15.4    | 23.8    | 21.2    | 18.9    | 54.6    | 35.2    | 20.2    | 16.5    | 26.8    | 20.3    | 10.3    | 34.2    | 15.3    | 44.0    | 28.7    | 42.0    | 23.2    | 25.6    | 25.1   | na     | na     |
| 490     | <263    | <158    | 290     | <232    | 370     | <237    | <205    | <269    | <224    | <710    | <478    | <221    | <263    | <244    | <307    | <270    | <274    | <281    | <354    | 3700    | 9700    | 600     | <50     | <289   | 84.9   | 83.0   |
| 770     | 190     | 170     | 560     | 268     | 536     | 477     | 247     | 333     | 296     | 1490    | 1750    | 433     | 300     | 640     | 526     | 264     | 372     | 600     | 690     | 1380    | 2340    | 910     | 400     | 304    | 148    | 154    |
| 5.8     | 4.9     | er      | 0.09    | 0.22    | 1.6     | <0.001  | 0.86    | 0.34    | 0.16    | 22.4    | 4.3     | 6.2     | 0.15    | 6.3     | 1.9     | <0.12   | 6.2     | 0.26    | 4.5     | 1.6     | 10.8    | 0.71    | 2.3     | 13.5   | na     | na     |
| <1.6    | <1.2    | 2.3     | 3.2     | 1.8     | 4.4     | 2.2     | 1.5     | <1.7    | 1.8     | 6.6     | 6.6     | 3.4     | 1.4     | 3.5     | 2.5     | 2.2     | 3.9     | 3.7     | 3.7     | 4.3     | 6.0     | 2.8     | 4.2     | 4.4    | na     | na     |
| 53000   | <1528   | <887    | 15100   | <1098   | 35900   | <1777   | 3200    | <1713   | 5400    | 93000   | 99700   | 7500    | <1334   | 15000   | 7300    | 1740    | 20700   | 25000   | 42200   | 52000   | 96000   | 52400   | 28000   | 7900   | 1460   | 360    |
| 21.5    | 6.6     | 0.19    | 1.0     | <0.24   | 0.66    | er      | 0.50    | 0.64    | 0.20    | 5.2     | er      | 4.9     | 0.56    | 4.0     | 3.9     | 0.25    | 0.43    | 1.6     | 3.3     | 0.69    | 2.6     | 0.63    | 1.3     | 10.8   | 6.1    | 5.0    |
| 1.9     | 2.5     | er      | 43.0    | 0.58    | 5.0     | <0.20   | 0.20    | 0.42    | 0.32    | 22.3    | 0.49    | 0.84    | 0.37    | er      | <0.25   | <0.20   | 2.9     | 0.28    | 2.2     | 4.1     | 20.9    | 3.5     | 6.8     | 43.0   | na     | na     |
| 534     | 467     | 238     | 255     | 279     | 212     | 293     | 227     | 292     | 218     | 210     | 183     | 319     | 266     | 256     | 243     | 295     | 206     | 255     | 217     | 159     | 346     | 113     | 198     | 207    | na     | na     |
| 0.58    | 1.1     | 4.8     | 3.8     | 53.1    | 2.7     | 17.0    | 10.4    | 3.8     | 2.6     | 4.9     | 2.6     | 23.1    | 4.2     | 16.0    | 4.9     | 29.0    | 3.5     | 3.9     | 2.6     | 20.1    | 44.5    | 19.4    | 33.1    | 2.2    | 0.78   | 0.63   |
| <0.001  | er      | <0.001  | 0.55    | <0.17   | <0.001  | <0.001  | <0.001  | er      | <0.001  | er      | <0.001  | er      | <0.001  | er      | <0.001  | <0.001  | <0.001  | <0.001  | <0.001  | <0.001  | er      | er      | er      | 1.6    | na     | na     |
| <0.001  | er      | <0.001  | <0.08   | <0.05   | <0.09   | <0.06   | er      | <0.001  | <0.001  | 0.91    | er      | er      | <0.001  | 0.08    | <0.001  | <0.001  | 0.33    | <0.001  | <0.08   | 0.08    | 0.69    | er      | 0.10    | 0.38   | na     | na     |
| 2600    | 3760    | 1135    | 1135    | 468     | 556     | 646     | 683     | 841     | 633     | 548     | 567     | 666     | 684     | 636     | 561     | 358     | 469     | 617     | 534     | 2026    | 1594    | 1729    | 1575    | 1937   | 123    | 65.6   |
| 846     | 384     | 109     | 169     | 178     | 159     | 184     | 167     | 198     | 125     | 174     | 109     | 274     | 205     | 232     | 187     | 252     | 205     | 164     | 206     | 172     | 376     | 137     | 283     | 155    | 1518   | 1632   |
| 541     | 566     | 668     | 672     | 668     | 628     | 892     | 876     | 1027    | 597     | 705     | 584     | 769     | 766     | 943     | 1101    | 485     | 717     | 760     | 738     | 507     | 1085    | 508     | 815     | 807    | 474    | 470    |

Appendix 5: La-ICP-MS data (cont.)

| RX6720 | RX6720 | RX6720 | RX6721 |
|--------|--------|--------|--------|--------|--------|--------|--------|--------|--------|--------|--------|--------|--------|--------|--------|--------|--------|--------|--------|--------|--------|--------|--------|--------|--------|--------|--------|
| lrr.   |
| 1_3    | 1_4    | 1_5    | 1_39   | 1_40   | 1_41   | 1_45   | 1_46   | 1_47   | 1_48   | 1_31   | 1_49   | 1_50   | 1_51   | 1_53   | 1_32   | 1_34   | 1_35   | 1_36   | 1_37   | 1_38   | 1_54   | 1_63   | 1_64   | 1_65   | 1_66   | 1_55   | 1_56   |
| 213100 | 225100 | 219300 | 234300 | 232800 | 251000 | 271000 | 240000 | 267000 | 248000 | 259000 | 262000 | 237300 | 228100 | 255800 | 252000 | 245200 | 259500 | 258000 | 259000 | 263000 | 224100 | 241000 | 246100 | 245000 | 265000 | 233500 | 217000 |
| 27160  | 25880  | 25990  | 29400  | 29130  | 27600  | 25100  | 26400  | 26070  | 27420  | 28600  | 24600  | 27940  | 28440  | 26170  | 25700  | 26560  | 25810  | 25400  | 26260  | 26390  | 26970  | 26300  | 27400  | 25800  | 26400  | 26180  | 27210  |
| 77900  | 70100  | 70200  | 86900  | 86600  | 72500  | 64700  | 73100  | 71300  | 75300  | 68400  | 67400  | 78100  | 78900  | 65500  | 65100  | 71700  | 67300  | 66100  | 68800  | 68500  | 68700  | 66800  | 70200  | 67500  | 72300  | 66900  | 74000  |
| 7660   | 6220   | 6300   | 8370   | 8520   | 5750   | 4670   | 5660   | 5290   | 7300   | 5210   | 5090   | 7330   | 7670   | 4940   | 4960   | 6000   | 4800   | 4900   | 4910   | 4940   | 6340   | 5760   | 5420   | 5970   | 6550   | 5550   | 7090   |
| 2420   | 1859   | 1860   | 2420   | 2510   | 1410   | 870    | 1520   | 1220   | 1600   | 1020   | 1080   | 2000   | 2270   | 1057   | 1028   | 1632   | 980    | 1027   | 1123   | 1171   | 1831   | 1464   | 1434   | 1501   | 1928   | 1493   | 2365   |
| 3940   | 3141   | 3160   | 4610   | 4510   | 2960   | 2270   | 2900   | 2760   | 3440   | 2410   | 2450   | 3770   | 4030   | 2490   | 2280   | 3220   | 2271   | 2353   | 2190   | 2540   | 3010   | 2920   | 3060   | 3038   | 3490   | 2720   | 3470   |
| 396    | 327    | 343    | 392    | 400    | 259    | 218    | 279    | 240    | 311    | 229    | 227    | 326    | 348    | 289    | 232    | 290    | 219    | 225    | 197    | 245    | 321    | 303    | 306    | 314    | 403    | 283    | 363    |
| 1796   | 1561   | 1635   | 1530   | 1410   | 1124   | 1054   | 1283   | 1157   | 1235   | 1120   | 1030   | 1235   | 1376   | 1330   | 1100   | 1168   | 1029   | 1020   | 882    | 1129   | 1500   | 1535   | 1454   | 1623   | 1893   | 1389   | 1576   |
| 5820   | 5420   | 5680   | 5290   | 4850   | 4260   | 4470   | 4690   | 4490   | 4830   | 4540   | 4150   | 4420   | 4410   | 6000   | 4240   | 3970   | 3980   | 3860   | 3300   | 4010   | 5290   | 6240   | 5880   | 6170   | 6420   | 5370   | 5370   |
| 263    | 245    | 262    | 226    | 184    | 185    | 185    | 186    | 182    | 183    | 185    | 166    | 168    | 173    | 242    | 168    | 160    | 164    | 156    | 127    | 175    | 242    | 273    | 264    | 269    | 309    | 229    | 234    |
| 561    | 578    | 594    | 377    | 342    | 378    | 438    | 412    | 436    | 392    | 426    | 391    | 330    | 312    | 630    | 414    | 309    | 370    | 376    | 284    | 418    | 533    | 648    | 622    | 656    | 717    | 566    | 478    |
| 56.7   | 62.2   | 61.3   | 33.3   | 31.0   | 34.8   | 47.9   | 38.2   | 45.4   | 41.3   | 43.6   | 38.5   | 30.1   | 26.6   | 65.0   | 41.6   | 25.6   | 39.6   | 35.8   | 26.8   | 36.6   | 56.5   | 79.7   | 72.3   | 68.6   | 75.7   | 63.0   | 43.3   |
| 302    | 324    | 299    | 158    | 134    | 163    | 231    | 194    | 229    | 210    | 236    | 198    | 140    | 105    | 440    | 228    | 127    | 188    | 166    | 131    | 172    | 290    | 435    | 407    | 365    | 384    | 344    | 230    |
| 32.6   | 35.5   | 30.2   | 18.0   | 14.1   | 15.7   | 26.4   | 19.1   | 25.9   | 23.4   | 26.1   | 22.4   | 15.9   | 12.5   | 54.0   | 21.6   | 14.3   | 19.8   | 17.9   | 14.3   | 17.7   | 31.2   | 51.3   | 52.5   | 45.6   | 46.2   | 39.7   | 25.5   |
| 2600   | 2670   | 2010   | 2950   | <1004  | 9800   | 1620   | 2150   | 2130   | 2200   | 1980   | 2810   | 2000   | <1067  | <1398  | er     | 3100   | 2600   | 1440   | 106000 | 1890   | 2080   | 2400   | 4400   | 4100   | 3210   | 5100   | 4700   |
| 291    | 279    | 260    | 282    | 217    | 240    | 251    | 288    | 285    | 304    | 321    | 273    | 296    | 342    | 348    | 318    | 223    | 305    | 274    | 195    | 232    | 316    | 334    | 367    | 311    | 313    | 329    | 430    |
| 10.8   | 6.8    | 150    | 16.9   | 31.4   | 7.4    | 13.4   | 56.0   | 5.0    | 15.9   | 8.5    | 19.8   | 47.0   | 83.0   | 99.0   | 83.0   | 55.0   | 65.0   | 24.5   | 10.9   | 22.2   | 6.6    | 14.5   | 8.1    | 10.9   | 7.7    | 8.1    | 119    |
| 5.7    | 13.9   | 156    | 4.7    | <6.0   | 11.9   | <5.0   | 130    | 4.8    | 9.6    | <4.1   | 140    | 235    | 117    | 73.0   | 203    | 177    | 168    | 16.7   | <7.1   | <5.4   | <5.2   | 24.0   | <3.7   | 12.2   | 6.5    | 9.5    | 240    |
| 1540   | 77.9   | 1110   | 1880   | 10900  | 42.0   | 33.7   | 11000  | 55.0   | 246    | 48.0   | 11900  | 22500  | 34100  | 47000  | 41000  | 26900  | 25000  | 3300   | 530    | 4700   | 52.4   | 880    | 61.0   | 91.0   | 84.0   | 190    | 33400  |
| 2250   | 3460   | 2270   | 1310   | 22000  | 1750   | 690    | 8800   | 4400   | 3220   | 550    | 4400   | 11500  | 10300  | 49000  | 11000  | 8100   | 10600  | 5500   | 11700  | 25100  | 5000   | 1650   | 3120   | 7700   | 5300   | 9500   | 9800   |
| na     | na     | na     | 4.1    | 13.7   | 7.9    | 6.5    | 20.0   | 4.8    | <3.4   | 4.8    | 13.5   | 15.3   | 22.4   | 20.6   | 29.0   | 27.8   | 18.3   | 11.8   | er     | 7.9    | 7.3    | 3.5    | 5.5    | 6.5    | 9.9    | 10.6   | 24.5   |
| 79.9   | 81.4   | 75.0   | <230   | <289   | <226   | 190    | <190   | <206   | <226   | <183   | <194   | <245   | <271   | 1100   | <239   | <286   | <276   | 240    | <307   | <200   | <188   | <155   | 250    | <197   | <277   | 180    | <285   |
| 115    | 125    | 183    | 94.0   | 148    | 147    | 209    | 197    | 131    | 117    | 139    | 370    | 227    | 293    | 480    | 550    | 184    | 240    | 111    | 280    | 186    | 146    | 127    | 182    | 216    | 155    | 241    | 470    |
| na     | na     | na     | 0.61   | 6.2    | 2.6    | <0.16  | 0.84   | 10.2   | 0.47   | <0.08  | 1.9    | 1.1    | 2.3    | 7.3    | 0.63   | 0.60   | 0.76   | 1.0    | 23.7   | 4.3    | 0.32   | 0.22   | 1.1    | 1.0    | 2.1    | 3.3    | 0.90   |
| na     | na     | na     | <1.1   | 2.2    | <1.0   | <0.88  | <1.1   | <1.1   | <0.99  | <1.1   | <1.1   | 1.9    | 1.7    | 5.0    | 5.4    | er     | 5.8    | <0.97  | er     | <1.1   | <1.2   | <0.87  | <0.90  | <1.2   | 1.6    | <1.3   | er     |
| 2320   | 141    | 1640   | 2800   | 16600  | <1343  | <1165  | 14200  | <1366  | <1154  | <1090  | 8200   | 36000  | 45000  | 87000  | 69000  | 56000  | 40000  | 5200   | 3600   | 9700   | <1424  | 1200   | <967   | <1127  | <1117  | <1323  | 54000  |
| 3.4    | 4.3    | 10.3   | 1.0    | 2.3    | 1.4    | 0.29   | 3.2    | 5.6    | 4.7    | 0.53   | 2.3    | 0.83   | 2.1    | 11.1   | 1.4    | 1.3    | 5.5    | 5.4    | 9.9    | 5.1    | 3.5    | 2.9    | 4.6    | 13.8   | 8.5    | 12.2   | 2.8    |
| na     | na     | na     | <0.16  | 0.10   | er     | er     | <0.18  | er     | <0.25  | er     | 0.26   | 0.19   | <0.48  | <0.23  | <0.17  | <0.31  | er     | <0.16  | er     | <0.17  | er     | er     | 0.16   | er     | <0.18  | <0.17  | er     |
| na     | na     | na     | 303    | 354    | 316    | 246    | 249    | 283    | 340    | 270    | 254    | 285    | 298    | 318    | 263    | 308    | 280    | 251    | 289    | 283    | 297    | 268    | 249    | 275    | 302    | 271    | 262    |
| 0.71   | 1.4    | 0.60   | 0.34   | 0.61   | 0.50   | <0.18  | 1.6    | 0.29   | <0.28  | 0.37   | 1.1    | 6.9    | 2.9    | 4.6    | 4.7    | 3.9    | 1.8    | 0.55   | 3.3    | 1.1    | 0.55   | 1.6    | 1.3    | 0.98   | 1.6    | 1.7    | 0.90   |
| na     | na     | na     | <0.001 | <0.001 | <0.15  | <0.001 | <0.001 | <0.001 | <0.001 | <0.001 | <0.001 | <0.001 | <0.20  | <0.31  | <0.16  | <0.001 | <0.001 | <0.001 | <0.001 | <0.001 | <0.001 | <0.001 | <0.001 | <0.001 | <0.17  | <0.001 | <0.001 |
| na     | na     | na     | <0.001 | <0.001 | er     | <0.001 | <0.001 | <0.001 | <0.05  | <0.001 | <0.001 | <0.001 | <0.001 | <0.07  | <0.001 | <0.06  | <0.001 | <0.001 | <0.001 | <0.001 | <0.05  | <0.04  | er     | <0.001 | <0.001 | <0.001 | <0.06  |
| 74.0   | 14.5   | 13.8   | 2.0    | 1.5    | 2.8    | 2.3    | 1.4    | 1.5    | 1.7    | 1.8    | 1.2    | 1.2    | 1.7    | 1.7    | 2.4    | 1.5    | 2.7    | 3.4    | 1.8    | 1.4    | 13.8   | 9.9    | 11.2   | 6.3    | 1.5    | 4.8    | 158    |
| 1680   | 1738   | 1860   | 1070   | 781    | 1170   | 1581   | 1420   | 1540   | 1420   | 1580   | 1670   | 980    | 950    | 2080   | 1710   | 1100   | 1256   | 1270   | 811    | 1550   | 1417   | 2080   | 2380   | 1770   | 2160   | 1500   | 1138   |
| 505    | 516    | 491    | 459    | 422    | 470    | 712    | 666    | 713    | 651    | 704    | 764    | 476    | 550    | 822    | 825    | 502    | 694    | 543    | 254    | 681    | 670    | 919    | 1068   | 794    | 987    | 751    | 624    |

| RX6721 | RX6722 | RX6713 |
|--------|--------|--------|--------|--------|--------|--------|--------|--------|--------|--------|--------|--------|--------|--------|--------|--------|--------|--------|--------|--------|--------|--------|--------|--------|--------|--------|
| lrr.   | CR     |
| 1_57   | 1_58   | 1_59   | 1_60   | 1_61   | 1_67   | 1_69   | 1_70   | 1_71   | 1_81   | 1_73   | 1_78   | 1_82   | 1_83   | 1_84   | 1_85   | 1_86   | 1_87   | 1_88   | 1_8    | 1_9    | 1_10   | 1_11   | 1_4    | 1_5    | 1_6    | 1_7    |
| 236000 | 251400 | 253000 | 230000 | 218800 | 240400 | 234700 | 251900 | 239800 | 222800 | 216600 | 220000 | 245000 | 233000 | 236700 | 243000 | 239000 | 229700 | 244300 | 192000 | 222000 | 199000 | 187000 | 207400 | 180400 | 225000 | 206900 |
| 27800  | 25520  | 24000  | 27600  | 28170  | 25740  | 25520  | 25460  | 25600  | 24990  | 27230  | 27270  | 25970  | 26700  | 25470  | 26050  | 28600  | 25960  | 25460  | 28400  | 38200  | 35000  | 41300  | 32700  | 36030  | 32900  | 31990  |
| 78000  | 65200  | 64400  | 71400  | 82000  | 67600  | 67500  | 65900  | 66300  | 68200  | 77400  | 78800  | 70700  | 69200  | 67700  | 70400  | 72600  | 71350  | 67500  | 81200  | 75500  | 83100  | 99500  | 91100  | 116400 | 94000  | 90400  |
| 6950   | 5190   | 4720   | 7330   | 8500   | 6000   | 5820   | 5690   | 5710   | 6350   | 8170   | 8020   | 6170   | 6550   | 5710   | 6690   | 6300   | 6950   | 5860   | 9250   | 7640   | 11040  | 13290  | 10350  | 16800  | 10720  | 10250  |
| 1990   | 1153   | 971    | 1910   | 2670   | 1701   | 1657   | 1677   | 1649   | 2030   | 2692   | 2610   | 1822   | 1810   | 1587   | 2073   | 1943   | 2162   | 1638   | 4000   | 3523   | 4070   | 5360   | 4510   | 7200   | 4550   | 4400   |
| 3740   | 2656   | 2466   | 3770   | 4700   | 3152   | 3050   | 2956   | 2987   | 3520   | 4660   | 4230   | 3290   | 3140   | 3151   | 3810   | 3700   | 3710   | 3040   | 5400   | 4490   | 6850   | 7920   | 6100   | 9820   | 6170   | 5750   |
| 379    | 272    | 260    | 449    | 455    | 314    | 296    | 294    | 299    | 427    | 454    | 429    | 353    | 343    | 343    | 435    | 383    | 386    | 315    | 539    | 438    | 733    | 801    | 623    | 830    | 568    | 552    |
| 1874   | 1397   | 1370   | 1640   | 1840   | 1370   | 1416   | 1312   | 1345   | 2280   | 1822   | 1850   | 1598   | 1680   | 1738   | 2151   | 1748   | 1653   | 1558   | 2070   | 1964   | 3150   | 3290   | 2670   | 2960   | 2131   | 2104   |
| 6800   | 6890   | 7370   | 6740   | 6040   | 4940   | 5190   | 4540   | 4800   | 6410   | 5630   | 5900   | 5410   | 6010   | 6650   | 6850   | 6180   | 5320   | 5670   | 7390   | 7590   | 11590  | 10680  | 7830   | 9300   | 8320   | 6770   |
| 292    | 261    | 252    | 259    | 259    | 214    | 218    | 203    | 208    | 346    | 238    | 249    | 248    | 273    | 301    | 316    | 280    | 228    | 254    | 265    | 284    | 430    | 460    | 341    | 370    | 319    | 251    |
| 721    | 715    | 757    | 646    | 503    | 478    | 530    | 427    | 462    | 1010   | 424    | 507    | 542    | 601    | 752    | 784    | 654    | 470    | 600    | 441    | 547    | 839    | 809    | 735    | 625    | 488    | 418    |
| 81.7   | 89.3   | 91.9   | 71.6   | 48.0   | 52.0   | 56.6   | 46.5   | 47.3   | 124    | 37.8   | 46.7   | 55.9   | 67.1   | 84.2   | 82.7   | 71.8   | 46.4   | 62.7   | 29.5   | 51.4   | 67.8   | 67.0   | 66.6   | 53.3   | 39.8   | 31.1   |
| 437    | 588    | 623    | 395    | 245    | 265    | 308    | 228    | 249    | 690    | 174    | 239    | 274    | 359    | 490    | 461    | 350    | 231    | 360    | 101    | 223    | 330    | 277    | 404    | 215    | 154    | 114    |
| 56.8   | 80.6   | 90.0   | 51.2   | 26.9   | 33.1   | 39.6   | 27.2   | 29.0   | 75.0   | 18.0   | 24.8   | 33.0   | 45.7   | 56.1   | 54.6   | 44.5   | 27.5   | 42.2   | 9.7    | 26.1   | 29.4   | 30.8   | 36.1   | 22.3   | 14.7   | 12.4   |
| 4050   | 7100   | 4800   | 3040   | 2620   | 6400   | 7100   | 6200   | 6700   | 10900  | 4100   | 143000 | 3280   | 3760   | 9000   | 39900  | 4540   | 8900   | 12700  | 2410   | 3070   | 3740   | 6100   | 5000   | 4300   | 3080   | 4790   |
| 373    | 424    | 355    | 318    | 389    | 778    | 872    | 738    | 759    | 1470   | 702    | 575    | 384    | 362    | 514    | 1270   | 491    | 488    | 409    | 262    | 434    | 358    | 752    | 407    | 597    | 338    | 730    |
| 5.2    | 11.7   | 9.4    | 9.3    | 33.3   | 107    | 205    | 93.0   | 127    | 970    | 111    | 217    | 21.9   | 27.0   | 149    | 600    | 18.0   | 108    | 21.0   | 18.6   | 60.6   | 15.0   | 39.0   | 1100   | 140    | 31.4   | 114    |
| 7.6    | 11.5   | 19.3   | 6.2    | 94.0   | 21.5   | 411    | 25.0   | 64.0   | 18.0   | 214    | 30200  | 23.6   | <5.8   | 21400  | 14800  | 12.3   | <8.3   | 127    | 6.6    | 9.0    | <4.3   | <4.0   | 2700   | <8.3   | 5.4    | <6.6   |
| 71.0   | 89.0   | 59.0   | 53.1   | 6400   | 15200  | 45300  | 4040   | 7400   | 39500  | 3530   | 2270   | 169    | 313    | 356    | 440    | 209    | 10500  | 112    | 2560   | 161    | er     | 40.3   | 32000  | 10600  | 208    | 12100  |
| 1280   | 3930   | 3020   | 1230   | 4200   | 13140  | 42100  | 8930   | 14000  | 84000  | 7900   | 35300  | 3880   | 2020   | 33600  | 23300  | 3160   | 39000  | 6310   | 5000   | 2100   | 1350   | 2430   | 71000  | 4870   | 4020   | 13200  |
| 5.5    | 9.5    | 7.9    | 5.0    | 8.1    | 28.4   | 50.0   | 26.6   | 26.3   | 1800   | 36.7   | 188    | 12.6   | 9.6    | 147    | 253    | 13.5   | 47.0   | 19.3   | 5.6    | 12.1   | 9.0    | 13.8   | 450    | 26.7   | 6.6    | 20.9   |
| <178   | <243   | 420    | 230    | <234   | <280   | 560    | <265   | <274   | <642   | <304   | <383   | <204   | <214   | <337   | <272   | <194   | <307   | <241   | er     | <218   | <178   | <189   | <271   | <396   | <217   | <238   |
| 227    | 233    | 230    | 83.0   | 149    | 617    | 1100   | 456    | 560    | 1620   | 376    | 335    | 236    | 207    | 216    | 480    | 293    | 380    | 223    | 93.0   | 198    | 146    | 376    | 1620   | 428    | 107    | 219    |
| 0.93   | 3.4    | 1.0    | 0.26   | 0.91   | 3.5    | 6.6    | 2.6    | 3.8    | 79.0   | 0.42   | 10.7   | <0.001 | er     | 7.1    | 18.7   | <0.001 | 0.87   | 0.84   | 1.1    | 0.33   | er     | er     | 160    | 22.0   | 4.3    | 2.0    |
| <0.90  | <1.3   | 0.87   | <0.99  | <1.3   | 2.9    | 4.6    | 2.2    | <1.2   | 12.8   | <1.5   | 2.8    | <0.92  | <1.2   | 3.6    | 4.2    | <1.2   | 2.8    | <1.3   | 1.8    | <1.2   | <0.81  | <1.0   | 37.0   | 13.9   | 1.5    | 9.4    |
| <944   | <1459  | <775   | <1053  | 9300   | 23800  | 80000  | 5800   | 11800  | 98000  | 7700   | 7100   | <1360  | <1717  | <2252  | <1807  | <1051  | 18000  | <1465  | 3400   | <15824 | <1006  | <1238  | 56000  | 18400  | <1686  | 16500  |
| 2.2    | 5.9    | 2.0    | 2.9    | 2.7    | 10.4   | 33.0   | 10.5   | 13.2   | 460    | 6.7    | 75.0   | 3.3    | 2.9    | 92.0   | 139    | 2.8    | 145    | 13.9   | er     | <0.20  | 0.36   | 0.73   | 159    | 1.3    | 2.2    | 1.4    |
| <0.18  | er     | <0.12  | <0.32  | <0.28  | 0.84   | 0.69   | 0.35   | 0.74   | <0.001 | <0.001 | <0.001 | er     | er     | <0.26  | er     | <0.001 | er     | 0.15   | 0.37   | 0.46   | <0.19  | 0.69   | 155    | 1.9    | 0.22   | 0.29   |
| 309    | 275    | 254    | 279    | 311    | 270    | 293    | 263    | 265    | 412    | 282    | 339    | 268    | 277    | 314    | 338    | 257    | 320    | 800    | 307    | 288    | 332    | 400    | 454    | 515    | 390    | 351    |
| 1.5    | 0.88   | 0.67   | 0.47   | 1.4    | 2.5    | 7.4    | 2.3    | 2.3    | 5.5    | 1.6    | 37.9   | 0.33   | 0.50   | 52.0   | 28.0   | 0.42   | 0.56   | 214    | <0.09  | <0.19  | 0.35   | <0.25  | 7.6    | 0.55   | <0.14  | 0.29   |
| <0.001 | <0.001 | <0.11  | <0.001 | <0.19  | <0.001 | <0.001 | <0.001 | <0.001 | <0.001 | <0.001 | <0.001 | <0.001 | <0.001 | <0.001 | <0.21  | <0.001 | <0.001 | <0.001 | <0.001 | <0.001 | <0.001 | er     | 1.6    | er     | <0.17  | <0.001 |
| <0.04  | <0.001 | er     | <0.001 | er     | <0.001 | <0.09  | <0.06  | er     | <0.001 | <0.001 | <0.001 | <0.001 | <0.001 | <0.001 | <0.001 | <0.001 | <0.001 | <0.001 | <0.001 | <0.001 | <0.001 | <0.001 | 1.8    | 0.21   | er     | <0.06  |
| 28.1   | 60.0   | 19.1   | 325    | 301    | 619    | 501    | 597    | 460    | 0.71   | 2.5    | 0.78   | 1.3    | 1.1    | 0.88   | 1.5    | 1.0    | 1.1    | 0.92   | 310    | 165    | 750    | 5290   | 1210   | 1460   | 168    | 650    |
| 2610   | 2850   | 2590   | 1390   | 1320   | 2063   | 2457   | 1821   | 1896   | 97000  | 1161   | 11200  | 1350   | 1490   | 10100  | 26400  | 1740   | 2120   | 2560   | 222    | 316    | 82.0   | 420    | 71000  | 1040   | 336    | 267    |
| 1185   | 1354   | 1099   | 626    | 638    | 987    | 1103   | 859    | 851    | 3581   | 526    | 580    | 625    | 771    | 2151   | 1876   | 818    | 549    | 1022   | 88.0   | 114    | 77.7   | 404    | 2836   | 580    | 120    | 199    |

Appendix 5: La-ICP-MS data (cont.)

| RX6714<br>CR |
|--------------|--------------|--------------|--------------|--------------|--------------|--------------|--------------|--------------|--------------|--------------|--------------|--------------|--------------|--------------|--------------|--------------|--------------|--------------|--------------|--------------|--------------|--------------|--------------|--------------|--------------|--------------|
| 1_21         | 1_22         | 1_23         | 1_28         | 1_12         | 1_13         | 1_14         | 1_15         | 1_16         | 1_17         | 1_44         | 1_45         | 1_29         | 1_38         | 1_39         | 1_40         | 1_41         | 1_42         | 1_43         | 1_30         | 1_31         | 1_32         | 1_33         | 1_34         | 1_35         | 1_36         | 1_37         |
| 265000       | 278000       | 290000       | 234000       | 159000       | 186000       | 190900       | 205000       | 182100       | 185000       | 328000       | 395000       | 244100       | 265800       | 302000       | 214000       | 317000       | 215000       | 303000       | 243000       | 264300       | 236000       | 259000       | 270000       | 170000       | 232000       | 277000       |
| 27100        | 25200        | 26000        | 29600        | 30000        | 29300        | 33200        | 30700        | 29100        | 31600        | 45300        | 58100        | 37300        | 26920        | 39900        | 29800        | 40000        | 31400        | 26300        | 35280        | 29400        | 34200        | 31900        | 33890        | 35360        | 34740        | 29600        |
| 66900        | 64400        | 68500        | 85600        | 79900        | 85100        | 92400        | 83900        | 84300        | 88200        | 131000       | 163000       | 103000       | 72100        | 109600       | 80600        | 107000       | 91400        | 72600        | 96900        | 80200        | 93600        | 86200        | 92900        | 109600       | 94400        | 71500        |
| 4750         | 5300         | 5520         | 8990         | 8640         | 8150         | 9330         | 8240         | 8540         | 8650         | 10820        | 12800        | 9600         | 6350         | 9540         | 7170         | 8100         | 8120         | 5850         | 8160         | 7390         | 8980         | 8400         | 9030         | 13460        | 8810         | 5540         |
| 1647         | 1790         | 1697         | 2770         | 2770         | 2540         | 2857         | 2550         | 2695         | 2580         | 3200         | 3540         | 2980         | 2060         | 2860         | 2080         | 2210         | 2540         | 1360         | 2500         | 1786         | 2760         | 2170         | 2690         | 4760         | 2670         | 1140         |
| 2280         | 2550         | 2660         | 4570         | 4710         | 4500         | 4970         | 4360         | 4560         | 4570         | 4750         | 4390         | 4752         | 3320         | 4620         | 3760         | 3180         | 4260         | 2810         | 4190         | 3920         | 4540         | 3990         | 4480         | 8830         | 4240         | 2540         |
| 187          | 229          | 222          | 476          | 496          | 464          | 532          | 451          | 454          | 462          | 468          | 416          | 480          | 308          | 450          | 363          | 267          | 384          | 227          | 393          | 327          | 449          | 401          | 424          | 1106         | 455          | 231          |
| 644          | 851          | 769          | 2000         | 2070         | 1950         | 2280         | 1950         | 1940         | 2120         | 1963         | 1580         | 1967         | 1195         | 1860         | 1640         | 996          | 1590         | 900          | 1650         | 1183         | 1990         | 1670         | 1933         | 5060         | 1788         | 943          |
| 842          | 1162         | 1271         | 4660         | 4850         | 4900         | 5470         | 4600         | 4100         | 4870         | 4450         | 3520         | 4590         | 2310         | 4260         | 4330         | 1910         | 3480         | 2460         | 3840         | 4370         | 4450         | 3460         | 3934         | 14100        | 4410         | 3030         |
| 70.6         | 105          | 84.9         | 256          | 268          | 246          | 293          | 270          | 249          | 276          | 270          | 233          | 268          | 154          | 261          | 236          | 121          | 212          | 108          | 232          | 158          | 265          | 204          | 270          | 646          | 233          | 126          |
| 110          | 169          | 137          | 408          | 427          | 421          | 475          | 459          | 394          | 436          | 503          | 372          | 455          | 243          | 456          | 502          | 208          | 350          | 173          | 413          | 248          | 447          | 349          | 495          | 1020         | 434          | 230          |
| 7.6          | 10.7         | 8.7          | 33.9         | 32.5         | 32.2         | 34.2         | 33.8         | 31.4         | 32.9         | 46.4         | 30.5         | 37.6         | 17.1         | 37.4         | 45.0         | 17.1         | 27.5         | 13.5         | 37.3         | 21.0         | 35.5         | 29.2         | 45.6         | 74.4         | 33.9         | 18.8         |
| 27.5         | 32.7         | 31.8         | 152          | 121          | 140          | 133          | 153          | 117          | 146          | 232          | 133          | 175          | 61.5         | 205          | 240          | 70.3         | 118          | 51.4         | 158          | 94.8         | 147          | 117          | 221          | 254          | 153          | 67.1         |
| 2.0          | 3.0          | 2.5          | 12.7         | 11.0         | 14.3         | 12.7         | 14.5         | 11.5         | 11.5         | 25.5         | 14.0         | 17.6         | 6.0          | 18.8         | 26.1         | 6.8          | 11.5         | 5.3          | 17.1         | 11.1         | 16.3         | 10.7         | 24.8         | 17.1         | 16.6         | 5.1          |
| 1230         | <687         | 1060         | 2700         | 5300         | 2180         | 1940         | 4500         | 1870         | 4100         | 2190         | <1244        | 2900         | 1840         | 2030         | 2570         | 2950         | 3200         | 1750         | 2360         | 3690         | 1430         | 3800         | 3960         | 175000       | 3280         | 1110         |
| 149          | 123          | 122          | 272          | 248          | 262          | 216          | 284          | 199          | 300          | 352          | 215          | 416          | 115          | 293          | 293          | 174          | 231          | 152          | 414          | 212          | 232          | 246          | 349          | 540          | 411          | 40.6         |
| 1.1          | <0.46        | 3.1          | 320          | 18.7         | 47.8         | 22.0         | 37.2         | 21.0         | 26.9         | 21.7         | 34.9         | 54.0         | 4.7          | 66.9         | 16.2         | 22.1         | 13.5         | 7.6          | 55.3         | <0.77        | 14.3         | 24.1         | 22.8         | 22.9         | 61.1         | 1.6          |
| <4.2         | <4.0         | <5.8         | 96.0         | 65.0         | 65.8         | 39.9         | 51.0         | 26.9         | 31.7         | 128          | 50.0         | 41.1         | 9.8          | 80.0         | 63.0         | 39.6         | 43.1         | 12.6         | 43.3         | 17.0         | 76.0         | 49.7         | 60.0         | <10.6        | 99.0         | 7.3          |
| <3.4         | <3.3         | <4.9         | 21000        | 14.8         | 840          | 47.0         | 35.5         | 145          | 79.0         | 82.0         | 30.5         | 550          | 99.0         | 3010         | 26.8         | 5.3          | 13.7         | 6.0          | 156          | 7.6          | 30.9         | 138          | 59.0         | 2280         | 16.1         | <4.4         |
| <61.4        | <74.5        | <65.4        | 88000        | 1830         | 2490         | 3310         | 2090         | 7800         | 710          | 8800         | 7400         | 790          | 6300         | 2180         | 1610         | 540          | 2400         | 940          | 410          | 310          | 4000         | 3430         | 2890         | 280          | 370          | 270          |
| <3.1         | <2.4         | 3.7          | 30.0         | 11.3         | 18.4         | 12.9         | 15.7         | 16.0         | 12.4         | 14.9         | 14.3         | 13.1         | 15.2         | 8.8          | 6.6          | 33.9         | 9.9          | 5.7          | 16.7         | 3.8          | 8.1          | 13.3         | 11.9         | 74.0         | 16.2         | <3.1         |
| <179         | <161         | <209         | <172         | <150         | <152         | <188         | <166         | <197         | <181         | <219         | <231         | <213         | <221         | <215         | <168         | <257         | <134         | <182         | <180         | <197         | <172         | <201         | <210         | <440         | <190         | <209         |
| <47.0        | <51.7        | <50.6        | 770          | 306          | 330          | 354          | 292          | 375          | 179          | 291          | 177          | 187          | 200          | 299          | 236          | 660          | 144          | 98.0         | 181          | 81.0         | 263          | 236          | 213          | <131         | 160          | <63.4        |
| <0.001       | <0.001       | <0.001       | 560          | 14.4         | 28.3         | 28.8         | 26.3         | 23.3         | 19.9         | 8.1          | 2.7          | 7.2          | 2.3          | 8.2          | 5.1          | 0.28         | 4.5          | 1.4          | 6.1          | er           | 12.0         | 16.0         | 7.3          | 2.5          | 4.7          | 0.20         |
| <0.85        | <0.99        | <1.2         | 1.4          | <0.93        | <0.80        | <1.2         | <0.98        | <1.2         | <0.90        | <1.3         | <1.3         | <1.0         | <1.1         | <1.4         | <1.0         | <1.2         | 1.2          | <0.82        | <0.92        | <1.1         | <1.2         | <1.3         | <1.5         | <2.3         | <1.2         | <0.92        |
| <1007        | <1099        | <1430        | 20000        | <1257        | 2450         | <1246        | <1107        | <1018        | <1043        | <1835        | <1481        | <1170        | <1235        | 3930         | <1092        | <1433        | <1166        | <1185        | <922         | <880         | <1353        | <1370        | <1380        | 4300         | <1350        | <1185        |
| er           | <0.001       | er           | 189          | 3.1          | 4.7          | 4.7          | 4.8          | 8.9          | 1.4          | 15.0         | 8.8          | 1.7          | 5.7          | 4.8          | 1.2          | 1.6          | 3.5          | 0.85         | 1.4          | 0.28         | 3.9          | 6.5          | 4.7          | er           | 1.5          | 0.39         |
| er           | <0.14        | <0.21        | 16.4         | 8.4          | 4.2          | 1.2          | 2.3          | 1.6          | 6.6          | 4.0          | 2.3          | 0.76         | 0.64         | 1.1          | 1.6          | 0.29         | 5.2          | 2.1          | 0.65         | <0.16        | 8.9          | 5.4          | 4.9          | 212          | 1.0          | 0.10         |
| 262          | 223          | 259          | 470          | 368          | 336          | 394          | 374          | 357          | 358          | 523          | 598          | 474          | 286          | 522          | 328          | 412          | 403          | 260          | 406          | 367          | 381          | 359          | 450          | 457          | 508          | 292          |
| 0.67         | 0.50         | <0.24        | 5.8          | 4.0          | 3.4          | 2.8          | 5.0          | 3.1          | 2.7          | 4.4          | 4.1          | 3.6          | 2.1          | 4.2          | 4.8          | 0.93         | 5.1          | 1.3          | 2.1          | 0.56         | 7.1          | 7.4          | 3.8          | 0.76         | 2.7          | 0.74         |
| <0.001       | <0.001       | <0.001       | <0.13        | 0.19         | er           | <0.001       | er           | <0.001       | <0.001       | er           | <0.001       | <0.001       | <0.001       | <0.18        | <0.001       | <0.26        | er           | er           | <0.001       | <0.001       | <0.001       | <0.17        | 0.15         | 1.2          | <0.001       | <0.001       |
| <0.001       | <0.001       | <0.001       | er           | <0.001       | <0.001       | <0.001       | <0.001       | <0.001       | <0.001       | <0.001       | <0.001       | <0.001       | <0.001       | <0.001       | er           | <0.001       | <0.05        | <0.001       | <0.001       | <0.001       | <0.001       | <0.001       | <0.001       | <0.10        | <0.001       | <0.05        |
| 1.9          | 2.0          | 2.7          | 22.8         | 30.9         | 26.1         | 33.6         | 24.4         | 17.0         | 31.9         | 9.3          | 5.3          | 10.3         | 1.8          | 11.4         | 6.3          | 5.4          | 10.6         | 5.0          | 10.4         | 0.95         | 6.6          | 7.7          | 40.7         | 2.2          | 12.8         | 0.63         |
| 1.5          | 1.5          | 2.2          | 419          | 188          | 232          | 278          | 290          | 247          | 215          | 505          | 202          | 283          | 113          | 421          | 530          | 70.4         | 229          | 77.0         | 256          | 13.6         | 436          | 284          | 502          | 72.0         | 231          | 24.3         |
|              | 0.96         | 5.8          | 367          | 136          | 224          | 161          | 247          | 182          | 166          | 299          | 173          | 240          | 77.7         | 304          | 392          | 72.3         | 148          | 52.6         | 232          | 10.2         | 256          | 249          | 342          | 7.9          | 267          | 22.7         |

| RX6716<br>CR | RX6726<br>CR |          |
|--------------|--------------|--------------|--------------|--------------|--------------|--------------|--------------|--------------|--------------|--------------|--------------|--------------|--------------|--------------|--------------|--------------|--------------|--------------|--------------|--------------|--------------|--------------|--------------|--------------|--------------|----------|
| 1_62         | 1_63         | 1_64         | 1_65         | 1_66         | 1_69         | 1_46         | 1_47         | 1_151        | 1_160        | 1_152        | 1_153        | 1_154        | 1_155        | 1_156        | 1_157        | 1_158        | 1_159        | 1_134        | 1_143        | 1_144        | 1_145        | 1_146        | 1_147        | 1_148        | 1_149        | 1_150    |
| 244500       | 248100       | 255800       | 255800       | 368000       | 245600       | 262000       | 260900       | 215000       | 221000       | 222200       | 260000       | 221600       | 195600       | 226000       | 231100       | 246000       | 226500       | 226000       | 231000       | 215100       | 219000       | 223000       | 228000       | 217000       | 208000       | 215200   |
| 26940        | 26960        | 26350        | 26100        | 21800        | 27800        | 24500        | 25370        | 29900        | 30400        | 28740        | 30600        | 30150        | 29000        | 30400        | 29690        | 31700        | 30200        | 29150        | 29700        | 28850        | 28200        | 30700        | 28200        | 29580        | 26700        | 29600    |
| 64400        | 63600        | 60500        | 61400        | 43200        | 65300        | 58100        | 60300        | 75500        | 77800        | 75300        | 78300        | 80200        | 82400        | 77600        | 75200        | 76400        | 84900        | 78800        | 81700        | 77100        | 79000        | 75100        | 75100        | 78300        | 68900        | 82600    |
| 4780         | 4740         | 4130         | 4360         | 1864         | 4980         | 3720         | 3980         | 6480         | 7800         | 6900         | 7550         | 7450         | 7720         | 7120         | 6940         | 6650         | 7520         | 7320         | 6850         | 7080         | 7550         | 7210         | 6610         | 6530         | 5290         | 7550     |
| 1528         | 1508         | 1279         | 1360         | 347          | 1608         | 1056         | 1131         | 2340         | 2400         | 2340         | 2632         | 2495         | 2760         | 2380         | 2240         | 2200         | 2470         | 2500         | 2230         | 2480         | 2490         | 2230         | 2200         | 2248         | 1700         | 2456     |
| 2216         | 2227         | 1775         | 1939         | 627          | 2330         | 1534         | 1572         | 2950         | 2710         | 2770         | 3460         | 2940         | 3490         | 2920         | 2670         | 2700         | 3120         | 3140         | 2750         | 2920         | 2760         | 2510         | 2450         | 2679         | 1900         | 3000     |
| 233          | 230          | 178          | 192          | 41.4         | 245          | 150          | 171          | 277          | 282          | 300          | 365          | 296          | 343          | 302          | 282          | 241          | 311          | 313          | 268          | 290          | 269          | 271          | 260          | 252          | 195          | 298      |
| 1089         | 1071         | 824          | 923          | 153          | 1206         | 640          | 638          | 1370         | 1260         | 1390         | 1660         | 1345         | 1354         | 1451         | 1390         | 1019         | 1380         | 1461         | 1285         | 1270         | 1186         | 1290         | 1130         | 1095         | 737          | 1241     |
| 3940         | 3870         | 2344         | 3290         | 378          | 4140         | 1947         | 2000         | 4950         | 3760         | 4830         | 5060         | 3850         | 4410         | 4340         | 3980         | 2720         | 4170         | 4990         | 4030         | 3520         | 3360         | 4220         | 3520         | 2970         | 2120         | 3680     |
| 171          | 166          | 122          | 144          | 19.2         | 183          | 92.6         | 94.8         | 230          | 190          | 227          | 248          | 201          | 196          | 223          | 195          | 151          | 206          | 249          | 191          | 185          | 178          | 193          | 175          | 160          | 118          | 187      |
| 323          | 333          | 241          | 271          | 36.7         | 355          | 175          | 179          | 587          | 452          | 572          | 575          | 482          | 302          | 520          | 610          | 317          | 471          | 631          | 501          | 400          | 408          | 506          | 403          | 355          | 248          | 421      |
| 25.1         | 24.6         | 20.5         | 20.9         | 2.7          | 28.8         | 13.5         | 14.1         | 78.0         | 50.9         | 69.5         | 60.2         | 52.8         | 29.1         | 56.9         | 56.4         | 34.7         | 55.4         | 78.7         | 57.3         | 43.7         | 46.3         | 57.6         | 45.0         | 38.2         | 28.0         | 48.1     |
| 97.8         | 88.6         | 81.4         | 79.3         | 11.4         | 101          | 49.9         | 54.7         | 434          | 280          | 380          | 306          | 281          | 164          | 325          | 368          | 192          | 318          | 417          | 298          | 231          | 236          | 332          | 229          | 211          | 164          | 253      |
| 9.1          | 8.9          | 8.0          | 7.1          | 1.1          | 9.1          | 4.9          | 5.1          | 49.2         | 29.6         | 37.0         | 32.8         | 32.4         | 16.0         | 34.4         | 36.4         | 19.2         | 35.4         | 43.9         | 32.1         | 23.2         | 29.1         | 34.8         | 24.3         | 24.3         | 20.6         | 27.1     |
| 2300         | <1359        | 1400         | 1410         | <932         | 1480         | 2550         | 1800         | 2350         | <729         | 2300         | 1350         | 1720         | 1450         | 1200         | 1200         | 1570         | 1730         | 910          | <1032        | er           | 2240         | 2110         | 1580         | 1930         | 1630         | 1870     |
| 386          | 261          | 206          | 220          | 24.1         | 319          | 144          | 145          | 425          | 214          | 368          | 399          | 317          | 151          | 349          | 330          | 319          | 271          | 313          | 361          | 267          | 340          | 374          | 356          | 315          | 271          | 287      |
| 1560         | 587          | 54.0         | 360          | 5.8          | 380          | 35.1         | 31.1         | 0.57         | er           | 10.0         | 4.6          | 8.4          | 0.89         | 0.68         | 1.1          | 0.92         | 1.0          | er           | 10.9         | 10.4         | 1.4          | 1.4          | 1.2          | 3.2          | 0.55         | 4.3      |
| 1950         | 336          | 19.6         | 820          | <4.2         | 272          | 33.4         | 53.0         | <5.4         | 4.6          | 230          | 188          | 51.0         | 12900        | 11.6         | 11.9         | <5.8         | 2600         | <5.0         | er           | 230          | 10.7         | 7.0          | <4.4         | 11.7         | <3.6         | 22.6     |
| 54900        | 18200        | 1970         | 12500        | 72.0         | 20200        | 6400         | 142          | 162          | 160          | 12400        | er           | 4600         | er           | 166          | 174          | 141          | 160          | 29.5         | er           | 9400         | 183          | 37.0         | 280          | 265          | 97.0         | 156      |
| 4450         | 1960         | 560          | 1740         | <66.4        | 1390         | 6100         | 580          | 460          | <66.6        | 1850         | 3420         | 1180         | 150          | 1210         | 2180         | 2380         | 3600         | 560          | er           | 10100        | 1020         | 1430         | 3030         | 1160         | <47.5        | <67.8    |
| <7.4         | <4.6         | 5.6          | 7.4          | <3.0         | 7.2          | 12.1         | 17.5         | <3.4         | <3.0         | <3.2         | 5.3          | 3.8          | 14.0         | <3.0         | <3.0         | 4.2          | 6.3          | <3.7         | <3.7         | 10.3         | 6.1          | <3.1         | 2.7          | 5.4          | 2.9          | <3.6     |
| <401         | <253         | <191         | <245         | <216         | <258         | <245         | <193         | <211         | <154         | <232         | <278         | <243         | <219         | <173         | <196         | <203         | <252         | <184         | <189         | <233         | <222         | <163         | <201         | <255         | <135         | <245     |
| 3740         | 1630         | 320          | 1310         | <63.6        | 1640         | 127          | 103          | <58.6        | <61.0        | er           | <75.5        | <66.4        | <58.3        | <67.0        | <78.2        | <69.4        | 102          | <69.6        | <60.6        | 890          | <70.2        | <47.9        | <49.2        | 147          | <55.9        | <80.5    |
| er           | <0.001       | er           | er           | <0.001       | <0.001       | 0.39         | <0.001       | 0.37         | <0.001       | 0.27         | 2.4          | 0.58         | <0.13        | 2.7          | 0.89         | 1.4          | 1.9          | er           | er           | 7.8          | 0.21         | 2.4          | 2.4          | 0.76         | <0.001       | <0.001   |
| <2.6         | <1.7         | <1.1         | <1.4         | <1.1         | <1.2         | <1.2         | <1.1         | <1.1         | <0.95        | <1.1         | <1.4         | 1.9          | <1.0         | <1.2         | <1.1         | <1.1         | <1.1         | <1.2         | <1.1         | <1.1         | <0.96        | <1.1         | <0.94        | <0.69        | <1.2         |          |
| 83000        | 26100        | 2500         | 18700        | <1081        | 27000        | 9700         | <1461        | <1258        | <1200        | 24000        | <1492        | 10900        | <1132        | <1511        | 1660         | <1269        | <1380        | <1166        | er           | 34000        | <1139        | <859         | <1102        | <1160        | <1000        | <1605    |
| <0.001       | er           | 0.40         | 1.4          | <0.29        | <0.001       | 2.1          | 0.69         | 0.22         | <0.19        | 1.2          | 10.9         | 0.82         | er           | 1.2          | 2.4          | 2.1          | 6.7          | <0.42        | er           | 20.0         | 2.8          | 2.3          | 4.3          | 3.1          | <0.001       | <0.001   |
| <0.001       | 0.30         | er           | er           | er           | er           | <0.16        | er           | <0.16        | <0.14        | er           | 3.3          | 0.20         | 0.24         | 0.28         | 0.38         | <0.17        | 0.12         | <0.22        | <0.18        | 0.54         | <0.17        | 0.12         | 2.8          | <0.16        | er           | er       |
| 335          | 268          | 226          | 272          | 162          | 284          | 196          | 236          | 265          | 280          | 287          | 301          | 338          | 325          | 266          | 291          | 318          | 308          | 342          | 327          | 337          | 295          | 284          | 298          | 298          | 253          | 299      |
| <0.33        | 0.49         | 0.54         | <0.24        | <0.43        | 0.51         | <0.24        | 0.32         | 0.52         | <0.12        | 0.43         | 0.66         | 0.64         | 2.2          | 0.35         | 0.23         | <0.24        | 1.1          | 0.30         | <0.27        | 1.3          | 0.20         | 1.5          | 0.38         | 0.74         | 0.25         | <0.28    |
| <0.61        | <0.001       | <0.001       | <0.001       | <0.001       | <0.001       | <0.001       | <0.001       | <0.001       | <0.001       | er           | er           | <0.001       | <0.001       | <0.001       | <0.001       | <0.001       | <0.16        | <0.001       | <0.001       | <0.001       | <0.001       | <0.17        | er           | <0.001       | <0.001       | <0.001   |
| <0.001       | <0.06        | <0.001       | <0.001       | <0.001       | <0.06        | <0.001       | <0.05        | <0.001       | <0.001       | <0.05        | <0.001       | <0.001       | <0.001       | <0.001       | <0.001       | <0.001       | <0.05        | <0.001       | <0.001       | <0.001       | <0.001       | <0.001       | <0.001       | <0.03        | <0.001       |          |
| 2.2          | 2.3          | 0.89         | 1.0          | 0.08         | 2.1          | 0.40         | 0.22         | 384          | 381          | 322          | 317          | 338          | 211          | 374          | 447          | 371          | 260          | 225          | 180          | 192          | 237          | 222          | 242          | 270          | 271          | 266      |
| 84.2         | 139          | 94.0         | 58.6         | 30.0         | 97.0         | 27.1         | 23.9         | 230          | 216          | 206          | 452          | 478          | 213          | 378          | 445          | 261          | 398          | 580          | 296          | 212          | 328          | 271          | 238          | 317          | 286          | 237      |
| 78.7         | 90.7         | 57.6         | 48.4         | 13.3         | 58.4         | 18.0         | 16.5         | 170          | 125          | 130          | 234          | 266          | 101          | 233          | 285          | 167          | 225          | 265          | 150          | 114          | 178          | 156.5542     | 142.12       | 191.73       | 135.5262     | 96.53673 |

| RX6726<br>CR | RX6714<br>Synchysite | RX6714<br>Synchysite | RX6714<br>Synchysite | RX6714<br>Synchysite | RX6714<br>Synchysite |     |
|--------------|--------------|--------------|--------------|--------------|--------------|--------------|--------------|--------------|--------------|--------------|--------------|--------------|--------------|--------------|--------------|--------------|--------------|--------------|--------------|--------------|--------------|----------------------|----------------------|----------------------|----------------------|----------------------|-----|
| 1_135        | 1_136        | 1_137        | 1_138        | 1_139        | 1_140        | 1_141        | 1_142        | 1_161        | 1_170        | 1_171        | 1_172        | 1_173        | 1_174        | 1_162        | 1_163        | 1_164        | 1_165        | 1_166        | 1_167        | 1_168        | 1_169        | 1_3                  | 1_4                  | 1_5                  | 1_6                  | 1_7                  |     |
| 206000       | 227000       | 215000       | 211700       | 261000       | 226000       | 219000       | 217000       | 205000       | 221000       | 244000       | 207200       | 213000       | 234000       | 236000       | 229000       | 251000       | 222000       | 231000       | 223000       | 210600       | 223400       | 115000               | 118400               | 123000               | 117200               | 119600               |     |
| 27900        | 29300        | 28500        | 28800        | 29800        | 31100        | 29000        | 28600        | 30200        | 29500        | 27200        | 30300        | 28400        | 29800        | 30500        | 29200        | 31500        | 30900        | 29500        | 29470        | 31150        | 30390        | 25340                | 26100                | 25100                | 26140                | 25740                |     |
| 70900        | 68900        | 75000        | 75600        | 74500        | 79200        | 77700        | 78500        | 83600        | 77400        | 71300        | 82700        | 76100        | 74700        | 79400        | 75100        | 84500        | 80400        | 80800        | 75800        | 85500        | 81800        | 78200                | 79000                | 75000                | 80900                | 83500                |     |
| 6300         | 6380         | 6540         | 6440         | 6040         | 7770         | 7740         | 7410         | 7710         | 6840         | 5970         | 7780         | 6500         | 7010         | 6740         | 6460         | 7170         | 7830         | 8620         | 6860         | 7910         | 7980         | 9340                 | 10000                | 8720                 | 10460                | 9740                 |     |
| 2270         | 2300         | 2200         | 2270         | 1970         | 2780         | 2900         | 2770         | 2570         | 2120         | 1950         | 2630         | 2070         | 2130         | 2300         | 2122         | 2470         | 2744         | 2760         | 2459         | 2820         | 2670         | 3320                 | 3540                 | 2940                 | 3680                 | 3362                 |     |
| 2750         | 2420         | 2510         | 2690         | 2300         | 3220         | 3340         | 3270         | 3510         | 2650         | 2220         | 3560         | 2430         | 2690         | 2560         | 2530         | 2820         | 3290         | 3550         | 2710         | 4030         | 3350         | 5970                 | 6190                 | 5360                 | 6550                 | 6200                 |     |
| 273          | 245          | 247          | 274          | 238          | 351          | 357          | 365          | 316          | 271          | 228          | 319          | 219          | 258          | 225          | 253          | 273          | 335          | 405          | 283          | 429          | 352          | 733                  | 766                  | 630                  | 835                  | 763                  |     |
| 1320         | 1230         | 1173         | 1137         | 1170         | 1740         | 1701         | 1840         | 1190         | 1330         | 1180         | 1285         | 1100         | 1250         | 1055         | 1125         | 1260         | 1498         | 2130         | 1310         | 1830         | 1670         | 3510                 | 3860                 | 2860                 | 3630                 | 3890                 |     |
| 3800         | 3400         | 3520         | 3300         | 3010         | 5270         | 5010         | 5950         | 3120         | 4010         | 3980         | 3400         | 3140         | 3670         | 3480         | 3930         | 3650         | 4690         | 6530         | 4450         | 4360         | 3860         | 9820                 | 11460                | 8000                 | 10270                | 11310                |     |
| 205          | 168          | 178          | 166          | 146          | 280          | 269          | 300          | 149          | 210          | 180          | 159          | 150          | 187          | 171          | 178          | 180          | 239          | 356          | 209          | 248          | 210          | 452                  | 509                  | 359                  | 463                  | 545                  |     |
| 532          | 424          | 437          | 402          | 351          | 695          | 641          | 790          | 257          | 500          | 483          | 322          | 355          | 422          | 404          | 449          | 438          | 568          | 935          | 511          | 469          | 402          | 751                  | 1003                 | 544                  | 723                  | 851                  |     |
| 61.2         | 52.9         | 49.0         | 45.7         | 37.3         | 77.4         | 70.1         | 98.0         | 22.5         | 56.5         | 62.2         | 26.7         | 35.2         | 45.8         | 44.8         | 50.0         | 51.4         | 61.1         | 108          | 61.2         | 36.2         | 38.8         | 52.7                 | 74.0                 | 33.6                 | 49.7                 | 68.1                 |     |
| 341          | 265          | 297          | 251          | 185          | 442          | 390          | 464          | 100          | 304          | 333          | 139          | 198          | 234          | 268          | 270          | 269          | 337          | 617          | 358          | 145          | 197          | 202                  | 290                  | 128                  | 161                  | 209                  |     |
| 39.1         | 26.4         | 27.3         | 28.6         | 18.9         | 52.3         | 44.1         | 45.8         | 10.7         | 30.3         | 34.2         | 14.1         | 19.9         | 24.1         | 30.7         | 26.7         | 27.8         | 32.5         | 60.8         | 30.2         | 12.5         | 22.0         | 12.6                 | 26.2                 | 10.4                 | 8.0                  | 16.5                 |     |
| 1860         | 1180         | 1480         | 2120         | 1840         | 1360         | 1510         | <899         | 1290         | 1620         | 1510         | 1310         | 920          | 2900         | 2420         | 790          | 2440         | <903         | <844         | er           | <863         | 1560         | 142000               | 130000               | 94000                | 125000               | 155000               |     |
| 351          | 335          | 354          | 305          | 328          | 283          | 303          | 277          | 151          | 260          | 394          | 218          | 214          | 349          | 429          | 324          | 401          | 296          | 197          | 276          | 176          | 270          | 508                  | 368                  | 248                  | 335                  | 890                  |     |
| 1.4          | <0.40        | <0.98        | 3.0          | <0.47        | 1.4          | 0.75         | <0.50        | 17.1         | 2.1          | <0.001       | 120          | <0.39        | 1.1          | 0.51         | <0.001       | er           | 1.3          | <0.001       | 95.0         | 33.0         | 3.3          | 24.0                 | 690                  | er                   | 60.0                 | 112                  |     |
| 4.3          | <3.2         | 33.0         | 25.0         | 8.0          | <4.6         | 41.4         | <4.3         | 19.9         | <4.2         | <3.4         | 41.0         | <3.1         | 8.3          | 5.2          | <4.0         | <5.2         | 6.5          | <6.3         | 330          | 75.0         | 310          | <16.9                | 85.0                 | <18.6                | 27.0                 | 33.0                 |     |
| 155          | 120          | 99.0         | 800          | 14.9         | 84.0         | 362          | 680          | 2410         | 1300         | 22.7         | 2090         | 99.0         | 103          | 141          | 690          | er           | 195          | 520          | 43000        | 5800         | 129          | er                   | 45000                | er                   | 11000                | 18800                |     |
| 910          | 210          | 117          | 263          | 156          | 590          | 120          | 256          | 3140         | 880          | <51.2        | 860          | 55.0         | 610          | 610          | 172          | <72.8        | 410          | 233          | 3600         | 9600         | 3270         | 570                  | 4400                 | <231                 | 1300                 | 1290                 |     |
| <2.6         | <2.3         | <3.1         | 4.2          | <2.9         | <3.5         | <3.2         | <3.3         | <4.3         | 6.1          | <2.4         | <3.4         | <2.4         | <3.1         | <3.1         | <2.8         | 3.7          | <2.7         | 3.1          | er           | <3.6         | 9.3          | 57.0                 | 78.5                 | 44.0                 | 40.0                 | 53.6                 |     |
| <138         | <163         | <178         | <181         | <165         | <196         | <160         | <191         | <278         | <208         | <128         | 260          | <144         | <200         | <204         | <174         | <178         | <227         | <209         | <226         | <183         | <213         | <671                 | <1123                | <600                 | <734                 | 5900                 |     |
| <51.1        | <42.2        | <65.5        | <47.6        | <58.2        | 166          | <60.4        | <54.0        | er           | <51.8        | <51.1        | 109          | <49.7        | <63.6        | 104          | <49.6        | <59.7        | <65.5        | <84.5        | 530          | 69.0         | <74.7        | <189                 | <290                 | <166                 | <170                 | <233                 |     |
| 1.1          | er           | er           | er           | er           | 0.47         | er           | 0.11         | 1.8          | <0.08        | <0.001       | 0.07         | <0.001       | 0.19         | 0.17         | 0.10         | <0.001       | 0.46         | er           | er           | 3.1          | 0.69         | 2.0                  | 4.4                  | er                   | er                   | 0.66                 |     |
| <0.74        | <1.0         | <0.93        | <0.91        | <0.86        | <1.1         | <0.85        | <1.0         | <1.4         | <0.83        | <0.87        | <1.5         | <0.87        | <1.1         | <1.2         | <1.4         | 1.1          | <1.0         | <0.93        | <1.3         | 1.4          | <0.93        | <2.8                 | <6.3                 | <3.2                 | <3.0                 | <5.7                 |     |
| <860         | <1112        | <1329        | <913         | <1063        | <1037        | <1016        | <1234        | 37400        | 2800         | <1046        | 3760         | <946         | <1131        | <1280        | 1290         | <967         | <1158        | 1860         | 73000        | 11600        | <1393        | er                   | 57000                | <3548                | 9900                 | 23000                |     |
| 1.7          | er           | <0.001       | er           | er           | 0.26         | er           | 0.23         | 3.1          | <0.001       | <0.001       | 2.6          | <0.001       | 1.5          | 0.99         | <0.26        | <0.001       | 0.86         | er           | er           | 18.9         | 3.0          | <0.69                | er                   | <0.001               | <0.70                | er                   |     |
| 0.67         | 0.22         | er           | <0.13        | 0.13         | 0.22         | <0.001       | <0.15        | er           | er           | er           | 0.20         | <0.001       | 0.42         | 0.23         | <0.001       | <0.14        | 0.30         | er           | 0.23         | 0.94         | <0.18        | 228                  | 690                  | <0.48                | <0.74                | 108                  |     |
| 275          | 284          | 274          | 281          | 282          | 308          | 299          | 302          | 319          | 297          | 257          | 302          | 274          | 242          | 295          | 284          | 340          | 345          | 282          | 275          | 299          | 313          | 360                  | 400                  | 270                  | 318                  | 451                  |     |
| 0.41         | <0.19        | 0.37         | 0.70         | 0.23         | 0.42         | 0.21         | <0.25        | 0.65         | <0.19        | <0.17        | <0.28        | <0.13        | 0.56         | <0.29        | <0.24        | 0.72         | 0.69         | <0.34        | <0.31        | 0.78         | 1.1          | <0.72                | <1.3                 | <0.61                | <0.63                | 1.5                  |     |
| <0.11        | <0.001       | <0.20        | <0.001       | <0.001       | <0.001       | <0.001       | <0.001       | <0.001       | <0.001       | <0.001       | <0.001       | <0.001       | <0.001       | er           | <0.001       | er           | <0.001       | <0.001       | <0.001       | <0.001       | <0.001       | <0.001               | 3.3                  | 10.4                 | <0.001               | <0.001               | 1.4 |
| <0.03        | <0.001       | <0.001       | <0.001       | er           | er           | <0.001       | <0.04        | <0.001       | <0.001       | <0.001       | <0.001       | <0.001       | <0.001       | <0.05        | <0.04        | <0.001       | er           | <0.001       | <0.001       | er           | <0.001       | <0.001               | <0.001               | <0.001               | <0.21                | <0.001               |     |
| 181          | 214          | 200          | 278          | 146          | 225          | 227          | 344          | 418          | 312          | 413          | 394          | 260          | 268          | 543          | 235          | 323          | 346          | 453          | 272          | 203          | 475          | 8.3                  | 14.4                 | 17.9                 | 29.5                 | 23.1                 |     |
| 479          | 498          | 281          | 359          | 221          | 715          | 336          | 236          | 108          | 202          | 305          | 125          | 139          | 282          | 402          | 104          | 323          | 366          | 389          | 237          | 60.0         | 344          | 44.8                 | 114                  | 29.0                 | 42.4                 | 39.6                 |     |
| 185.04       | 232.3376     | 146.75       | 165.7197     | 102.307      | 337.1546     | 179.09       | 145.93       | 78.637       | 112.81       | 196.24       | 106.58       | 76.396       | 161.19       | 229.05       | 69.541       | 162.48       | 226.85       | 217.72       | 123.25       | 43.034       | 213.78       | 9.7567621            | 26.533017            | 2.9610292            | 11.643124            | 21.604097            |     |

|            |  |
|------------|--|
| RX6714     |  |
| Synchysite |  |
| 1_2        |  |
| 114200     |  |
| 21700      |  |
| 62400      |  |
| 6550       |  |
| 2110       |  |
| 3680       |  |
| 376        |  |
| 1630       |  |
| 3430       |  |
| 189        |  |
| 297        |  |
| 21.5       |  |
| 75.0       |  |
| 5.9        |  |
|            |  |
| 20200      |  |
| 214        |  |
| 22.9       |  |
| 13.5       |  |
| 345        |  |
| 1610       |  |
| 18.6       |  |
| <167       |  |
| 59.0       |  |
| 7.4        |  |
| <1.2       |  |
| <1242      |  |
| 0.73       |  |
| 4.5        |  |
| 270        |  |
| 1.5        |  |
| er         |  |
| <0.001     |  |
| 27.7       |  |
| 104        |  |
| 69.455472  |  |
